# Supplementary material
Source: PubMed Central journal article supplement (PMC5668870)

## ***Supporting Information***

*for*

### **Chemical Synthesis of GPI Glycan-Peptide Conjugates by Traceless Staudinger Ligation**

Sanyong Zhu and Zhongwu Guo\*

Department of Chemistry, University of Florida, 214 Leigh Hall, Gainesville, Florida 32611,  
United States

\*Corresponding Author E-mail: [zguo@chem.ufl.edu](mailto:zguo@chem.ufl.edu)

### **Table of Contents**

|                                                                                                           |                |
|-----------------------------------------------------------------------------------------------------------|----------------|
| I. Experimental -----                                                                                     | Page S2 – S13  |
| II. MS spectra and HPLC diagrams of CD52 peptide, its phosphinothioesters,<br>and its GPI conjugate ----- | Page S13 – S17 |
| III. NMR and MS spectra of synthetic intermediates and other GPI-peptide<br>conjugates-----               | Page S18 – S83 |

## I. Experimental

**General methods.** Commercial chemicals and materials were used as received without additional purification unless noted otherwise. Molecular sieves 4Å were flame-dried under vacuum and then cooled to rt under an N<sub>2</sub> atmosphere immediately before use. TLC was carried out on Silica Gel 60Å F254 plates with detection by a UV detector and/or by charring with 10% H<sub>2</sub>SO<sub>4</sub> in EtOH (v/v). Mass spectrometry (MS) was recorded either on a high resolution ESI-TOF machine or on a normal resolution MALD-TOF machine. NMR spectra were recorded on a 400, 500 or 600 MHz machine with chemical shifts reported in ppm ( $\delta$ ) downfield from internal tetramethylsilane (TMS) or DHO references and with signals described as s (singlet), d (doublet), t (triplet) or m (multiplet) and coupling constants reported in Hz.

### Methyl 6-*O*-[(2-azidoethoxy)-phosphono]-2,3,4-tri-*O*-(*p*-methoxybenzyl)- $\alpha$ -D-mannopyranoside (**10**).

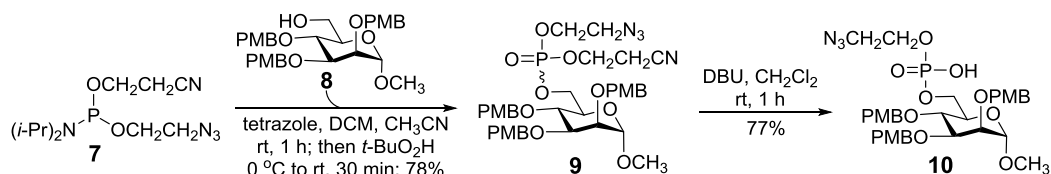

To a solution of **8** (560 mg, 1.01 mmol) and freshly prepared **7** (870 mg, 3.03 mmol) in CH<sub>2</sub>Cl<sub>2</sub>/CH<sub>3</sub>CN (v/v, 2/1, 10 mL) was added slowly an acetonitrile solution of tetrazole (~0.45 M, 11.22 mL, 5.05 mmol) at rt under an N<sub>2</sub> atmosphere. After the mixture was stirred at rt for 1 h, it was cooled to 0 °C and mixed with *tert*-butyl hydroperoxide (5.5 M solution in decane, 0.92 mL, 5.05 mmol). The mixture was stirred at rt for another 30 min and quench with aqueous Na<sub>2</sub>S<sub>2</sub>O<sub>3</sub>. The aqueous layer was extracted with CH<sub>2</sub>Cl<sub>2</sub> three times. The combined organic layer was washed with aqueous NaHCO<sub>3</sub> and brine, dried, and concentrated under vacuum. The residue was purified by column chromatography (EtOAc/hexane 2:1) to give **9** (595 mg, 78% yield) as a diastereomeric mixture (R/S 1:1). It was dissolved in CH<sub>2</sub>Cl<sub>2</sub> (10 mL). After adding DBU (2 drops) and stirring at rt for 1 h, the solvent was evaporated, and the residue was purified by flash silica gel column chromatography (CH<sub>3</sub>OH/CH<sub>2</sub>Cl<sub>2</sub> 1:10) to give **10** (426.6 mg, 77%) as colorless syrup.  $R_f$  = 0.45 (CH<sub>3</sub>OH/CH<sub>2</sub>Cl<sub>2</sub> 1:4); <sup>1</sup>H NMR (500 MHz, CDCl<sub>3</sub>)  $\delta$ : 7.17 – 7.13 (m, 6H, Ph), 6.78 – 6.74 (m, 6H, Ph), 4.72 (d,  $J$  = 10.5 Hz, 1H, Ph-CH<sub>2</sub>), 4.55 (d,  $J$  = 12 Hz, 1H, Ph-CH<sub>2</sub>), 4.53 (d,  $J$  = 1.5 Hz, 1H, H-1), 4.50 (d,  $J$  = 10.5 Hz, 1H, Ph-CH<sub>2</sub>), 4.48 (d,  $J$  = 10.0 Hz, 1H, Ph-CH<sub>2</sub>), 4.44 (d,  $J$  = 12.0 Hz, 1H, Ph-CH<sub>2</sub>), 4.41 (d,  $J$  = 11.5 Hz, 1H, Ph-CH<sub>2</sub>), 4.08 (dd,  $J$  =

12.0, 5.0 Hz, 1H, H-6a), 4.02 (dd,  $J = 11.0, 5.0$  Hz, 1H, H-6b), 3.92 – 3.88 (m, 2H,  $-OCH_2CH_2-$ ), 3.72 (s, 3H, Ph- $OCH_3$ ), 3.71 (s, 3H, Ph- $OCH_3$ ), 3.70 (s, 3H, Ph- $OCH_3$ ), 3.66 – 3.64 (m, 3H, H-2, H-3, H-4), 3.58 – 3.56 (m, 1H, H-5), 3.26 – 3.24 (m, 2H,  $-CH_2CH_2-N_3$ ), 3.19 (s, 3H,  $-OCH_3$ ).  $^{13}C$  NMR (125 MHz,  $CDCl_3$ )  $\delta$ : 159.25, 159.13, 159.08, 130.53, 130.48, 130.06, 129.62, 129.50, 129.24, 113.71, 99.13(C-1), 79.67, 74.62, 74.27, 74.14, 72.49, 71.78, 71.28, 64.80, 64.17, 55.20, 54.62, 51.29.  $^{31}P$  NMR (160 MHz,  $CDCl_3$ )  $\delta$ : -2.49. HR ESI-TOF MS ( $m/z$ ): calcd for  $C_{33}H_{41}N_3O_{12}P$  [M - H] $^-$ , 702.2433; found, 702.2446.

### Methyl 6-*O*-[(2-azidoethoxy)-phosphono]- $\alpha$ -D-mannopyranoside (**11**).

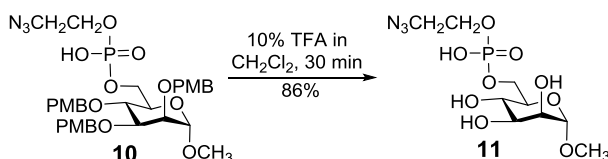

To a solution of **10** (330 mg, 0.47 mmol) in  $CH_2Cl_2$  (4.5 mL) was added TFA (0.5 mL). After stirring at rt for 30 min, the reaction mixture was co-evaporated with toluene three times. The residue was subjected to silica gel column chromatography ( $CH_3OH/EtOAc$  1:1) to produce **11** (138 mg, 86% yield) as colorless syrup.  $R_f = 0.42$  ( $CH_3OH/EtOAc$  1:1);  $^1H$  NMR (600 MHz,  $CD_3OD$ )  $\delta$ : 4.61 (d,  $J = 1.8$  Hz, 1H, H-1), 4.14 – 4.06 (m, 2H, H-6a, H-6b), 4.03 – 4.00 (m, 2H,  $-OCH_2CH_2-$ ), 3.76 (dd,  $J = 3.6, 1.8$  Hz, 1H, H-2), 3.70 (dd,  $J = 9.6, 5.4$  Hz, 1H, H-4), 3.66 (dd,  $J = 9.6, 3.6$  Hz, 1H, H-3), 3.57 – 3.55 (m, 1H, H-5), 3.46 (t,  $J = 5.4$  Hz, 2H,  $-CH_2CH_2N_3$ ), 3.35 (s, 3H,  $-OCH_3$ ).  $^{13}C$  NMR (150 MHz,  $CD_3OD$ )  $\delta$ : 102.79 (C-1), 73.44 (C-5), 72.47 (C-3), 72.05 (C-2), 68.17 (C-4), 66.08 (C-6), 65.42 ( $-OCH_2CH_2-$ ), 55.26 ( $-OCH_3$ ), 52.60 ( $-CH_2CH_2N_3$ ).  $^{31}P$  NMR (160 MHz,  $CD_3OD_3$ )  $\delta$ : 0.61. HR ESI-TOF MS ( $m/z$ ): calcd for  $C_9H_{17}N_3O_9P$  [M - H] $^-$ , 342.0708; found, 342.0717.

### Methyl 3,4,6-tri-*O*-(*p*-methoxybenzyl)- $\alpha$ -D-mannopyranosyl-(1 $\rightarrow$ 6)-2,3,4-tri-*O*-(*p*-methoxybenzyl)- $\alpha$ -D-mannopyranoside (**13**).

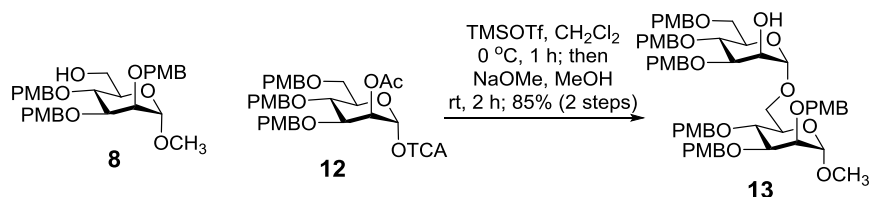

To a stirred mixture of **8** (118 mg, 0.213 mmol), **12** (196 mg, 0.319 mmol) and molecular sieves  $4\text{\AA}$  in anhydrous  $CH_2Cl_2$  (5 mL) was added slowly TMSOTf (5.8  $\mu$ L, 0.032 mmol) under an  $N_2$  atmosphere at 0  $^\circ C$ . After the mixture was stirred at 0  $^\circ C$  for 1 h, it was neutralized with  $Et_3N$ ,

filtered, and concentrated under vacuum. The residue was purified by silica gel column chromatography (EtOAc/hexane 1:2) to give the disaccharide as colorless syrup. This product was then dissolved in CH<sub>3</sub>OH (5 mL) and mixed with CH<sub>3</sub>ONa (11.5 mg, 0.213 mmol) at rt. After the mixture was stirred at rt for 2 h, it was concentrated under vacuum. The residue was purified by silica gel column chromatography (EtOAc/hexane 3:1) to afford **13** (195 mg, 85% for two steps) as colorless syrup.  $R_f = 0.30$  (EtOAc/hexane 3:1); <sup>1</sup>H NMR (600 MHz, CDCl<sub>3</sub>)  $\delta$ : 7.30 – 7.24 (m, 8H, Ph), 7.16 (d,  $J = 8.4$  Hz, 2H, Ph), 7.05 (d,  $J = 8.8$  Hz, 2H, Ph), 6.87 – 6.78 (m, 12H, Ph), 5.05 (d,  $J = 1.2$  Hz, 1H, H-1<sup>Man-II</sup>), 4.82 (d,  $J = 10.8$  Hz, 1H, Ph-CH<sub>2</sub>), 4.72 (d,  $J = 10.2$  Hz, 1H, Ph-CH<sub>2</sub>), 4.67 (d,  $J = 12.0$  Hz, 1H, Ph-CH<sub>2</sub>), 4.66 (d,  $J = 1.2$  Hz, 1H, H-1<sup>Man-I</sup>), 4.63 – 4.48 (m, 6H, Ph-CH<sub>2</sub>), 4.42 (d,  $J = 10.2$  Hz, 1H, Ph-CH<sub>2</sub>), 4.41 (d,  $J = 12.0$  Hz, 1H, Ph-CH<sub>2</sub>), 4.37 (d,  $J = 10.2$  Hz, 1H, Ph-CH<sub>2</sub>), 4.08 (dd,  $J = 3.0, 4.8$  Hz, 1H), 3.88 – 3.70 (m, 8H), 3.81 (s, 3H, Ph-OCH<sub>3</sub>), 3.79 (s, 3H, Ph-OCH<sub>3</sub>), 3.77 (s, 3H, Ph-OCH<sub>3</sub>), 3.76 (s, 3H, Ph-OCH<sub>3</sub>), 3.75 (s, 3H, Ph-OCH<sub>3</sub>), 3.72 (s, 3H, Ph-OCH<sub>3</sub>), 3.67 (dd,  $J = 10.8, 4.2$  Hz, 1H), 3.62 (dd,  $J = 8.4, 4.8$  Hz, 1H), 3.59 (dd,  $J = 10.8, 1.8$  Hz, 1H), 3.25 (s, 3H, -OCH<sub>3</sub>), 2.35 (d,  $J = 3.0$  Hz, 1H, -OH). <sup>13</sup>C NMR (150 MHz, CDCl<sub>3</sub>)  $\delta$ : 159.43 (Ph-OCH<sub>3</sub>), 159.33 (Ph-OCH<sub>3</sub>), 159.26 (Ph-OCH<sub>3</sub>), 159.23 (3C, Ph-OCH<sub>3</sub>), 130.86, 130.82, 130.53, 130.11, 129.78, 129.70, 129.65, 129.53, 129.40, 113.99, 113.88, 113.86, 113.81, 113.76, 99.78(C-1<sup>Man-II</sup>), 98.88(C-1<sup>Man-I</sup>), 80.07, 79.18, 74.84, 74.77, 74.49, 74.45, 74.03, 73.08, 72.44, 71.83, 71.50, 71.14, 68.56, 68.16, 66.48, 55.41 (Ph-OCH<sub>3</sub>), 55.39 (Ph-OCH<sub>3</sub>), 55.37 (2C, Ph-OCH<sub>3</sub>), 55.34 (Ph-OCH<sub>3</sub>), 55.31 (Ph-OCH<sub>3</sub>), 54.75 (-OCH<sub>3</sub>). HR ESI-TOF MS ( $m/z$ ): calcd for C<sub>61</sub>H<sub>72</sub>O<sub>17</sub>Na [M + Na]<sup>+</sup>, 1099.4667; found, 1099.4663.

**Methyl 6-*O*-*tert*-butyldimethylsilyl-2,3,4-tri-*O*-(*p*-methoxybenzyl)- $\alpha$ -D-mannopyranosyl-(1 $\rightarrow$ 2)-3,4,6-tri-*O*-(*p*-methoxybenzyl)- $\alpha$ -D-mannopyranosyl-(1 $\rightarrow$ 6)-2,3,4-tri-*O*-(*p*-methoxybenzyl)- $\alpha$ -D-mannopyranoside (**15**).**

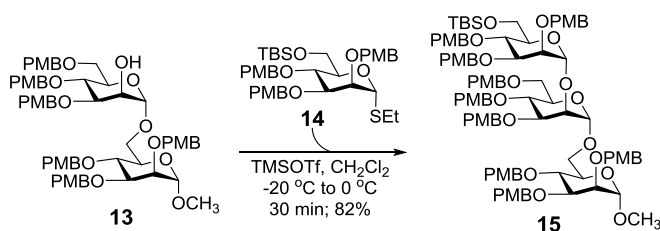

After the mixture of **13** (688 mg, 0.64 mmol), **14** (537 mg, 0.77 mmol), and molecular sieves 4Å in anhydrous diethyl ether (10 mL) was stirred at rt for 10 min, it was cooled to -20 °C, which was followed by the addition of NIS (346 mg, 1.54 mmol) and AgOTf (19.8 mg, 0.077 mmol). The mixture was stirred at 0 °C for 30 min and then quenched with Et<sub>3</sub>N, filtered, and



concentrated under vacuum. The residue was purified by silica gel column chromatography (EtOAc/hexane 1:2) to produce **15** (899mg, 82%) as colorless syrup.  $R_f = 0.60$  (EtOAc/hexane 1:1);  $^1\text{H NMR}$  (600 MHz,  $\text{CDCl}_3$ )  $\delta$ : 7.30 (d,  $J = 8.4$  Hz, 2H, Ph), 7.26 – 7.18 (m, 12H, Ph), 7.15 (d,  $J = 8.4$  Hz, 2H, Ph), 7.11 (d,  $J = 8.4$  Hz, 2H, Ph), 6.86 – 6.73 (m, 18H, Ph), 5.24 (s, 1H, H-1<sup>Man-II</sup>), 4.86 (s, 1H, H-1<sup>Man-III</sup>), 4.83 (d,  $J = 10.8$  Hz, 2H, Ph- $\text{CH}_2$ ), 4.75 (d,  $J = 10.8$  Hz, 1H, Ph- $\text{CH}_2$ ), 4.68 (s, 1H, H-1<sup>Man-I</sup>), 4.67 (d,  $J = 12.0$  Hz, 1H, Ph- $\text{CH}_2$ ), 4.63 (d,  $J = 12.0$  Hz, 1H, Ph- $\text{CH}_2$ ), 4.60 (d,  $J = 12.0$  Hz, 1H, Ph- $\text{CH}_2$ ), 4.56 (d,  $J = 10.8$  Hz, 1H, Ph- $\text{CH}_2$ ), 4.51 – 4.45 (m, 4H, Ph- $\text{CH}_2$ ), 4.44 – 4.35 (m, 7H, Ph- $\text{CH}_2$ ), 4.15 (d,  $J = 2.4$  Hz, 1H), 3.96 – 3.85 (m, 5H), 3.83 – 3.59 (m, 11H), 3.81 (s, 3H, Ph- $\text{OCH}_3$ ), 3.80 (s, 3H, Ph- $\text{OCH}_3$ ), 3.78 (s, 3H, Ph- $\text{OCH}_3$ ), 3.76 (s, 3H, Ph- $\text{OCH}_3$ ), 3.74 (s, 6H, Ph- $\text{OCH}_3 \times 2$ ), 3.73 (s, 3H, Ph- $\text{OCH}_3$ ), 3.68 (s, 3H, Ph- $\text{OCH}_3$ ), 3.66 (s, 3H, Ph- $\text{OCH}_3$ ), 3.57 (d,  $J = 10.8$  Hz, 1H), 3.25 (s, 3H, - $\text{OCH}_3$ ), 0.90 (s, 9H, - $t\text{Bu}$ ), 0.08 (s, 3H, - $\text{SiCH}_3$ ), 0.07 (s, 3H, - $\text{SiCH}_3$ ).  $^{13}\text{C NMR}$  (150 MHz,  $\text{CDCl}_3$ )  $\delta$ : 159.30 (Ph- $\text{OCH}_3$ ), 159.23 (2C, Ph- $\text{OCH}_3$ ), 159.18 (Ph- $\text{OCH}_3$ ), 159.15 (Ph- $\text{OCH}_3$ ), 159.14 (Ph- $\text{OCH}_3$ ), 159.08 (Ph- $\text{OCH}_3$ ), 159.03 (2C, Ph- $\text{OCH}_3$ ), 131.42, 131.13, 131.04, 130.89, 130.78, 130.47, 129.76, 129.57, 129.43, 129.37, 129.22, 113.89, 113.85, 113.81, 113.79, 113.74, 113.73, 113.71, 113.59, 99.33(C-1<sup>Man-II</sup>), 98.88(C-1<sup>Man-III</sup>), 98.72(C-1<sup>Man-I</sup>), 80.28, 79.59, 74.72, 74.60, 74.57, 74.50, 74.27, 73.67, 73.07, 72.96, 72.32, 72.05, 71.84, 71.79, 71.54, 71.42, 71.08, 69.07, 66.69, 62.87, 60.53, 55.39 (2C, Ph- $\text{OCH}_3$ ), 55.36 (Ph- $\text{OCH}_3$ ), 55.32 (3C, Ph- $\text{OCH}_3$ ), 55.29 (Ph- $\text{OCH}_3$ ), 55.25 (Ph- $\text{OCH}_3$ ), 55.18 (Ph- $\text{OCH}_3$ ), 54.64 (- $\text{OCH}_3$ ), 26.14, 18.51, -4.83, -5.06. HR ESI-TOF MS ( $m/z$ ): calcd for  $\text{C}_{97}\text{H}_{120}\text{O}_{25}\text{SiNa}$  [ $\text{M} + \text{Na}$ ] $^+$ , 1735.7786; found, 1735.7780.

**Ethyl 6-*O*-*tert*-butyldimethyl- silyl-2,3,4-tri-*O*-(*p*-methoxybenzyl)-1-thio- $\alpha$ -D-mannopyranoside (**14**)**

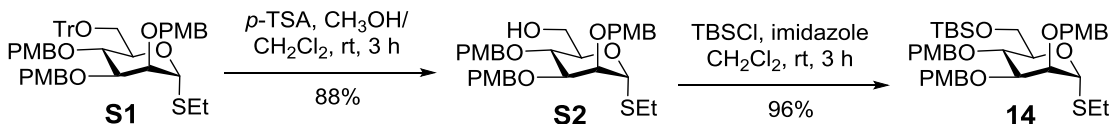

To a solution of **S1** (836 mg, 1.0 mmol) in  $\text{CH}_3\text{OH}/\text{CH}_2\text{Cl}_2$  (1/1, v/v, 10 mL) was added *p*-TSA (19 mg, 0.1 mmol). After stirring at rt for 3 h, the reaction was quenched with  $\text{Et}_3\text{N}$ . The solvent was removed under vacuum, and the residue was purified by silica gel column chromatography (EtOAc/hexane 1:2) to give **S2** (513.9 mg, 88%) as colorless syrup.  $R_f = 0.45$  (EtOAc/hexane 1:1);  $^1\text{H NMR}$  (600 MHz,  $\text{CDCl}_3$ )  $\delta$ : 7.28 – 7.22 (m, 6H, Ph), 6.86 – 6.84 (m, 6H, Ph), 5.24 (s, 1H, H-1), 4.85 (d,  $J = 10.8$  Hz, 1H, Ph- $\text{CH}_2$ ), 4.64 (d,  $J = 12.6$  Hz, 1H, Ph- $\text{CH}_2$ ), 4.61 (d,  $J = 12.0$  Hz,

1H, Ph-CH<sub>2</sub>), 4.55 – 4.48 (m, 3H, Ph-CH<sub>2</sub>), 3.95 (dd, *J* = 9.6, 3.6 Hz, 1H, H-3), 3.92 (t, *J* = 9.6 Hz, 1H, H-4), 3.80 – 3.73 (m, 4H, H-2, H-5, H-6a, H-6b), 3.80 (s, 3H, Ph-OCH<sub>3</sub>), 3.79 (s, 3H, Ph-OCH<sub>3</sub>), 3.78 (s, 3H, Ph-OCH<sub>3</sub>), 2.58 – 2.50 (m, 2H, -SCH<sub>2</sub>CH<sub>3</sub>), 1.94 (dd, *J* = 7.2, 6.0 Hz, 1H, -OH), 1.22 (t, *J* = 7.2 Hz, 1H, -SCH<sub>2</sub>CH<sub>3</sub>). <sup>13</sup>C NMR (150 MHz, CDCl<sub>3</sub>) δ: 159.41 (Ph-OCH<sub>3</sub>), 159.37 (Ph-OCH<sub>3</sub>), 159.32 (Ph-OCH<sub>3</sub>), 130.74, 130.50, 130.24, 129.80, 129.65, 129.50, 113.94, 82.26(C-1), 80.14, 76.16, 74.96, 74.89, 72.48, 72.07, 71.87, 62.57, 55.40 (3C, Ph-OCH<sub>3</sub>), 25.41 (-SCH<sub>2</sub>CH<sub>3</sub>), 15.01 (-SCH<sub>2</sub>CH<sub>3</sub>). HR ESI-TOF MS (*m/z*): calcd for C<sub>32</sub>H<sub>40</sub>O<sub>8</sub>SNa [M + Na]<sup>+</sup>, 607.2342; found, 607.2332.

To a solution of **S2** (368 mg, 0.63 mmol) in CH<sub>2</sub>Cl<sub>2</sub> (5 mL) was added imidazole (85.6 mg, 1.26 mmol). After stirring at rt for 10 min, TBSCl (142.7 mg, 0.95 mmol) was added, and the mixture was stirred at rt for another 3 h. The mixture was concentrated under vacuum, and the residue was purified by silica gel column chromatography (EtOAc/hexane 1:10) to give **14** (422.7 mg, 96%) as colorless syrup. *R<sub>f</sub>* = 0.50 (EtOAc/hexane 1:5); <sup>1</sup>H NMR (600 MHz, CDCl<sub>3</sub>) δ: 7.31 – 7.24 (m, 6H, Ph), 6.87 (d, *J* = 8.4 Hz, 6H, Ph), 5.31 (s, 1H, H-1), 4.85 (d, *J* = 10.8 Hz, 1H, Ph-CH<sub>2</sub>), 4.63 (d, *J* = 12.6 Hz, 1H, Ph-CH<sub>2</sub>), 4.61 (d, *J* = 12.0 Hz, 1H, Ph-CH<sub>2</sub>), 4.55 – 4.49 (m, 3H, Ph-CH<sub>2</sub>), 3.94 (dd, *J* = 9.6, 3.6 Hz, 1H, H-3), 3.88 (t, *J* = 9.6 Hz, 1H, H-4), 3.83 – 3.80 (m, 3H, H-5, H-6a, H-6b), 3.80 (s, 6H, Ph-OCH<sub>3</sub> x 2), 3.79 (s, 3H, Ph-OCH<sub>3</sub>), 3.76 (dd, *J* = 3.0, 1.8 Hz, 1H, H-2), 2.64 – 2.50 (m, 2H, -SCH<sub>2</sub>CH<sub>3</sub>), 1.25 (t, *J* = 7.8 Hz, 1H, -SCH<sub>2</sub>CH<sub>3</sub>), 0.90 (s, 9H, -*t*Bu), 0.07 (s, 3H, -SiCH<sub>3</sub>), 0.06 (s, 3H, -SiCH<sub>3</sub>). <sup>13</sup>C NMR (150 MHz, CDCl<sub>3</sub>) δ: 159.23 (Ph-OCH<sub>3</sub>), 131.06, 130.62, 130.36, 129.65, 129.49, 113.77, 81.36(C-1), 80.07, 76.15, 74.86, 74.78, 73.50, 71.75, 71.50, 62.86, 55.33 (3C, Ph-OCH<sub>3</sub>), 26.00 (-*t*Bu), 25.02 (-SCH<sub>2</sub>CH<sub>3</sub>), 18.37 (-SiC(CH<sub>3</sub>)<sub>3</sub>), 14.98 (-SCH<sub>2</sub>CH<sub>3</sub>), -5.06 (-SiCH<sub>3</sub>), -5.22 (-SiCH<sub>3</sub>). HR ESI-TOF MS (*m/z*): calcd for C<sub>38</sub>H<sub>54</sub>O<sub>8</sub>SSiNa [M + Na]<sup>+</sup>, 721.3206; found, 721.3231.

**Methyl 2,3,4-tri-*O*-(*p*-methoxybenzyl)- $\alpha$ -D-mannopyranosyl-(1 $\rightarrow$ 2)-3,4,6-tri-*O*-(*p*-methoxybenzyl)- $\alpha$ -D-mannopyranosyl-(1 $\rightarrow$ 6)-2,3,4-tri-*O*-(*p*-methoxybenzyl)- $\alpha$ -D-mannopyranoside (**16**).**

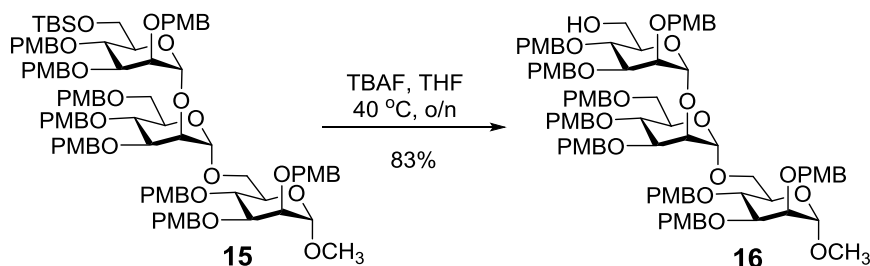

To a solution of **15** (678 mg, 0.395 mmol) in THF (4.0 mL) was added TBAF (0.60 mL, 1.0 M in THF, 0.60 mmol). The mixture was stirred at 40 °C overnight. After the solvent was removed under vacuum, the residue was purified by silica gel column chromatography (EtOAc/hexane 1:1) to afford **16** as colorless syrup (545 mg, 86%).  $R_f = 0.50$  (EtOAc/hexane 2:1);  $^1\text{H NMR}$  (600 MHz,  $\text{CDCl}_3$ )  $\delta$ : 7.30 – 7.11 (m, 18H, Ph), 6.87 – 6.76 (m, 18H, Ph), 5.15 (d,  $J = 1.2$  Hz, 1H, H-1<sup>Man-II</sup>), 5.01 (d,  $J = 1.8$  Hz, 1H, H-1<sup>Man-III</sup>), 4.83 (d,  $J = 10.8$  Hz, 1H, Ph- $\text{CH}_2$ ), 4.81 (d,  $J = 10.8$  Hz, 1H, Ph- $\text{CH}_2$ ), 4.77 (d,  $J = 10.2$  Hz, 1H, Ph- $\text{CH}_2$ ), 4.69 (d,  $J = 1.2$  Hz, 1H, H-1<sup>Man-I</sup>), 4.66 (d,  $J = 13.2$  Hz, 2H, Ph- $\text{CH}_2$ ), 4.62 (d,  $J = 12.0$  Hz, 1H, Ph- $\text{CH}_2$ ), 4.54 – 4.41 (m, 12H, Ph- $\text{CH}_2$ ), 4.12 (t,  $J = 1.8$  Hz, 1H), 3.90 – 3.58 (m, 17H), 3.81 (s, 3H, Ph- $\text{OCH}_3$ ), 3.80 (s, 3H, Ph- $\text{OCH}_3$ ), 3.79 (s, 3H, Ph- $\text{OCH}_3$ ), 3.76 (s, 3H, Ph- $\text{OCH}_3$ ), 3.74 (s, 3H, Ph- $\text{OCH}_3$ ), 3.73 (s, 6H, Ph- $\text{OCH}_3 \times 2$ ), 3.67 (s, 6H, Ph- $\text{OCH}_3 \times 2$ ), 3.26 (s, 3H, - $\text{OCH}_3$ ).  $^{13}\text{C NMR}$  (150 MHz,  $\text{CDCl}_3$ )  $\delta$ : 159.30 (Ph- $\text{OCH}_3$ ), 159.21 (Ph- $\text{OCH}_3$ ), 159.17 (Ph- $\text{OCH}_3$ ), 159.11 (Ph- $\text{OCH}_3$ ), 159.03 (Ph- $\text{OCH}_3$ ), 130.89, 130.85, 130.83, 130.80, 130.77, 130.54, 130.39, 130.31, 129.63, 129.52, 129.34, 129.19, 113.91, 113.85, 113.82, 113.74, 113.72, 113.68, 99.71(C-1<sup>Man-II</sup>), 99.61(C-1<sup>Man-III</sup>), 99.00(C-1<sup>Man-I</sup>), 80.06, 79.65, 78.84, 74.96, 74.77, 74.65, 74.56, 74.23, 74.18, 74.10, 72.97, 72.85, 72.30, 72.06, 71.94, 71.83, 71.60, 71.33, 68.99, 66.46, 62.78, 55.35 (Ph- $\text{OCH}_3$ ), 55.34 (2C, Ph- $\text{OCH}_3$ ), 55.30 (Ph- $\text{OCH}_3$ ), 55.28 (2C, Ph- $\text{OCH}_3$ ), 55.26 (Ph- $\text{OCH}_3$ ), 55.20 (Ph- $\text{OCH}_3$ ), 55.16 (Ph- $\text{OCH}_3$ ), 54.78 (- $\text{OCH}_3$ ). HR ESI-TOF MS ( $m/z$ ): calcd for  $\text{C}_{91}\text{H}_{106}\text{O}_{25}\text{Na}$  [ $\text{M} + \text{Na}$ ]<sup>+</sup>, 1621.6921; found, 1621.6911.

**Methyl 6-*O*-[(2-azidoethoxy)-phosphono]-2,3,4-tri-*O*-(*p*-methoxybenzyl)- $\alpha$ -D-mannopyranosyl-(1 $\rightarrow$ 2)-3,4,6-tri-*O*-(*p*-methoxybenzyl)- $\alpha$ -D-mannopyranosyl-(1 $\rightarrow$ 6)-2,3,4-tri-*O*-(*p*-methoxybenzyl)- $\alpha$ -D-mannopyranoside (**17**).**

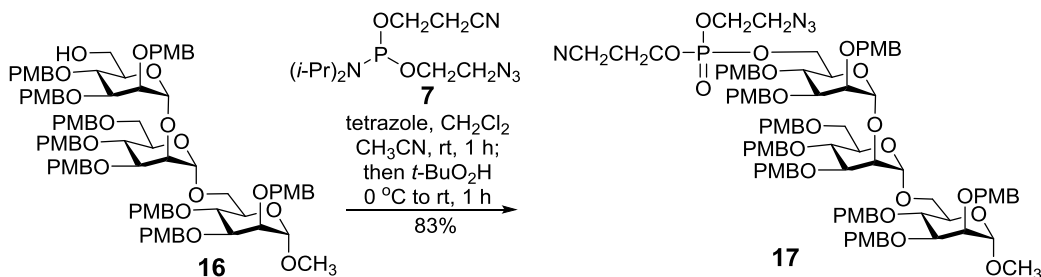

To a solution of **16** (500 mg, 0.313 mmol) and freshly prepared **7** (269mg, 0.938 mmol) in anhydrous  $\text{CH}_2\text{Cl}_2/\text{CH}_3\text{CN}$  (2:1, v/v, 8 mL) was added slowly an acetonitrile solution of tetrazole (~0.45 M, 6.96 mL, 3.13 mmol) under an  $\text{N}_2$  atmosphere. After the mixture was stirred at rt for 1 h, it was cooled to 0 °C, and then *tert*-butyl hydroperoxide (5.5 M solution in decane, 0.57 mL,

3.13 mmol) was added. The mixture was stirred at rt for 1 h and quenched with aqueous  $\text{Na}_2\text{S}_2\text{O}_3$ . The aqueous layer was extracted with  $\text{CH}_2\text{Cl}_2$  three times. The combined organic layer was washed with aqueous  $\text{NaHCO}_3$  and brine, dried, and concentrated under vacuum. The residue was purified by column chromatography (EtOAc/hexane 2:1) to give the phosphorylated product as a diastereomeric mixture (R/S  $\approx$  1/1). This product was then dissolved in  $\text{CH}_2\text{Cl}_2$  (8 mL) and mixed with DBU (2 drops). After stirring at rt for 1.5 h, the solution was concentrated, and the residue was subjected to silica gel column chromatography ( $\text{CH}_3\text{OH}/\text{CH}_2\text{Cl}_2$  1:10) to produce **17** (393.5 mg, 72% for 2 steps) as colorless syrup.  $R_f = 0.55$  ( $\text{CH}_3\text{OH}/\text{CH}_2\text{Cl}_2$  1:5);  $^1\text{H}$  NMR (600 MHz,  $\text{CD}_3\text{OD}$ )  $\delta$ : 7.35 (d,  $J = 8.4$  Hz, 2H, Ph), 7.25 – 7.11 (m, 12H, Ph), 7.06 (d,  $J = 8.4$  Hz, 2H, Ph), 7.02 (d,  $J = 8.4$  Hz, 2H, Ph), 6.86 – 6.75 (m, 14H, Ph), 6.71 (d,  $J = 8.4$  Hz, 2H, Ph), 6.68 (d,  $J = 8.4$  Hz, 2H, Ph), 5.09 (s, 1H, H-1<sup>Man-II</sup>), 4.92 (s, 1H, H-1<sup>Man-III</sup>), 4.82 (s, 1H, H-1<sup>Man-I</sup>), 4.77 (d,  $J = 10.8$  Hz, 1H, Ph- $\text{CH}_2$ ), 4.71 – 4.64 (m, 4H, Ph- $\text{CH}_2$ ), 4.61 (d,  $J = 10.8$  Hz, 1H, Ph- $\text{CH}_2$ ), 4.51 (d,  $J = 10.8$  Hz, 1H, Ph- $\text{CH}_2$ ), 4.45 – 4.32 (m, 10H, Ph- $\text{CH}_2$ ), 4.27 (d,  $J = 10.8$  Hz, 1H, Ph- $\text{CH}_2$ ), 4.20 – 4.15 (m, 2H), 4.02 – 3.92 (m, 3H), 3.89 – 3.40 (m, 17H), 3.75 (s, 3H, Ph- $\text{OCH}_3$ ), 3.73 (s, 3H, Ph- $\text{OCH}_3$ ), 3.71 (s, 3H, Ph- $\text{OCH}_3$ ), 3.69 (s, 3H, Ph- $\text{OCH}_3$ ), 3.68 (s, 6H, Ph- $\text{OCH}_3 \times 2$ ), 3.62 (s, 3H, Ph- $\text{OCH}_3$ ), 3.61 (s, 3H, Ph- $\text{OCH}_3$ ), 3.57 (s, 3H, Ph- $\text{OCH}_3$ ), 3.32 (s, 3H,  $-\text{OCH}_3$ ).  $^{13}\text{C}$  NMR (150 MHz,  $\text{CD}_3\text{OD}$ )  $\delta$ : 160.84 (Ph- $\text{OCH}_3$ ), 160.80 (Ph- $\text{OCH}_3$ ), 160.76 (Ph- $\text{OCH}_3$ ), 160.67 (Ph- $\text{OCH}_3$ ), 160.65 (Ph- $\text{OCH}_3$ ), 160.58 (Ph- $\text{OCH}_3$ ), 160.52 (Ph- $\text{OCH}_3$ ), 132.43, 132.08, 132.01, 131.97, 131.91, 131.75, 131.65, 131.38, 131.27, 130.97, 130.90, 130.81, 130.69, 130.66, 130.49, 130.43, 114.99, 114.81, 114.76, 114.71, 114.60, 114.57, 101.02(C-1<sup>Man-II</sup>), 100.64(C-1<sup>Man-III</sup>), 100.19(C-1<sup>Man-I</sup>), 81.18, 80.32, 79.38, 76.05, 75.57, 75.34, 75.19, 75.12, 73.86, 73.37, 73.31, 73.16, 72.83, 72.72, 72.56, 72.46, 71.61, 69.86, 67.91, 65.47, 63.51, 55.70, 55.65, 55.58, 55.45, 53.58, 52.59. MALDI-TOF MS (m/z): calcd for  $\text{C}_{93}\text{H}_{109}\text{N}_3\text{O}_{28}\text{PNa}$  [ $\text{M} + 2\text{Na} - \text{H}$ ]<sup>+</sup>, 1792.673; found, 1792.610.

**Methyl 6-O-[(2-azidoethoxy)-phosphono]- $\alpha$ -D-mannopyranosyl-(1 $\rightarrow$ 2)- $\alpha$ -D-mannopyranosyl-(1 $\rightarrow$ 6)- $\alpha$ -D-mannopyranoside (**18**).**

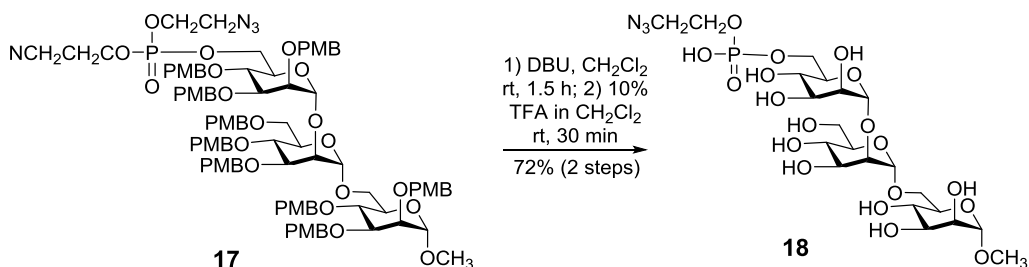

To a solution of **17** (286 mg, 0.164 mmol) in CH<sub>2</sub>Cl<sub>2</sub> (3.6mL) was added TFA (0.4 mL). After stirring at rt for 30 min, the reaction mixture was co-evaporated with toluene three times. The residue was subjected to flash silica gel column chromatography (CH<sub>3</sub>OH/EtOAc 1:1) to afford **18** (96.3 mg, 88% yield) as a white foamy solid. *R<sub>f</sub>* = 0.45 (CH<sub>3</sub>OH/EtOAc 2:1); <sup>1</sup>H NMR (600 MHz, D<sub>2</sub>O) δ: 5.13 (d, *J* = 1.2 Hz, 1H, H-1<sup>Man-II</sup>), 5.02 (d, *J* = 1.2 Hz, 1H, H-1<sup>Man-III</sup>), 4.74 (d, *J* = 1.2 Hz, 1H, H-1<sup>Man-I</sup>), 4.15 (ddd, *J* = 11.4, 5.4, 1.8 Hz, 1H), 4.09 (t, *J* = 5.4 Hz, 1H), 4.07 – 4.03 (m, 3H, H-2<sup>Man-III</sup>, -OCH<sub>2</sub>CH<sub>2</sub>-), 3.99 (dd, *J* = 3.6, 1.2 Hz, 1H, H-2<sup>Man-II</sup>), 3.96 – 3.94 (m, 2H), 3.92 (dd, *J* = 3.6, 1.2 Hz, 1H, H-2<sup>Man-I</sup>), 3.82 (dd, *J* = 9.6, 1.2 Hz, 1H), 3.76 – 3.68 (m, 7H), 3.52 (t, *J* = 4.8 Hz, 2H, -CH<sub>2</sub>CH<sub>2</sub>N<sub>3</sub>), 3.39 (s, 3H, -OCH<sub>3</sub>). <sup>13</sup>C NMR (150 MHz, D<sub>2</sub>O) δ: 102.33 (C-1<sup>Man-II</sup>), 100.87 (C-1<sup>Man-III</sup>), 97.81 (C-1<sup>Man-I</sup>), 78.87, 72.64, 71.93, 70.62, 70.11, 69.81, 66.76, 66.54, 66.21, 65.75, 64.63, 60.79, 54.69 (-OCH<sub>3</sub>), 50.89 (-CH<sub>2</sub>CH<sub>2</sub>N<sub>3</sub>). <sup>31</sup>P NMR (160 MHz, D<sub>2</sub>O) δ: 0.30. HR ESI-TOF MS (*m/z*): calcd for C<sub>21</sub>H<sub>37</sub>N<sub>3</sub>O<sub>19</sub>P [M - H]<sup>-</sup>, 666.1764; found, 666.1764.

#### General procedure for the preparation of peptide phosphinothioesters.

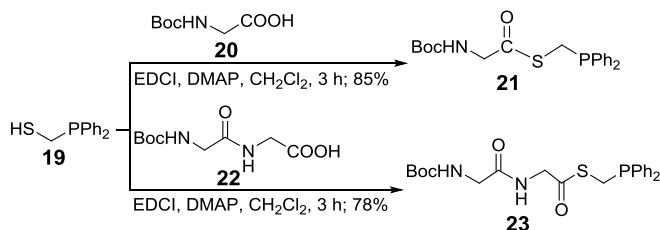

To a stirred solution of freshly prepared **19** (232.3 mg, 1.0 mmol) and amino acid **20** (175.2 mg, 1.0 mmol) or peptide **21** (232.2 mg, 1.0 mmol) in anhydrous CH<sub>2</sub>Cl<sub>2</sub> (10 mL) were added EDCI (465.7 mg, 3.0 mmol) and DMAP (24.4 mg, 0.2 mmol). After stirring at rt for 3 h, the mixture was diluted with CH<sub>2</sub>Cl<sub>2</sub>, washed with water and brine, dried, and concentrated under vacuum. The residue was purified by silica gel column chromatography to produce **21** (350.2 mg, 85%) and **23** (348.7 mg, 78%).

**21**: a white solid. *R<sub>f</sub>* = 0.65 (EtOAc/hexane 1:3); <sup>1</sup>H NMR (400 MHz, CDCl<sub>3</sub>) δ: 7.45 – 7.34 (m, 10H, Ph), 5.16 (s, 1H, -NH-), 3.99 (d, *J* = 6.4 Hz, 2H, -NHCH<sub>2</sub>CO-), 3.52 (d, *J* = 3.6 Hz, 2H, -SCH<sub>2</sub>PPh<sub>2</sub>), 1.43 (s, 9H, -*t*Bu). <sup>13</sup>C NMR (100 MHz, CDCl<sub>3</sub>) δ: 197.55 (-COS-), 155.52 (-OCONH-), 136.76, 132.69, 129.24, 128.60, 80.42 (-*Ot*Bu), 50.25 (-NHCH<sub>2</sub>CO-), 28.36 (-*t*Bu), 25.23 (-SCH<sub>2</sub>PPh<sub>2</sub>). HR ESI-TOF MS (*m/z*): calcd for C<sub>20</sub>H<sub>24</sub>NO<sub>3</sub>SPNa [M + Na]<sup>+</sup>, 412.1112; found, 412.1116.

**23**: a white solid. *R<sub>f</sub>* = 0.35 (EtOAc/hexane 1:1); <sup>1</sup>H NMR (600 MHz, CDCl<sub>3</sub>) δ: 7.42 – 7.35 (m, 10H, Ph), 6.86 (s, 1H, -NH-), 5.20 (s, 1H, -NH-), 4.17 (d, *J* = 6.0 Hz, 2H, -BocNHCH<sub>2</sub>CO-), 3.83

(d,  $J = 4.8$  Hz, 2H,  $-\text{NHCH}_2\text{CO}-$ ), 3.52 (d,  $J = 3.6$  Hz, 2H,  $-\text{SCH}_2\text{PPh}_2$ ), 1.44 (s, 9H,  $-t\text{Bu}$ ).  $^{13}\text{C}$  NMR (150 MHz,  $\text{CDCl}_3$ )  $\delta$ : 195.71 ( $-\text{COS}-$ ), 169.80 ( $-\text{OCONH}-$ ), 156.11 ( $-\text{OCONHBoc}-$ ), 136.50, 132.76, 129.24, 128.58, 80.47 ( $-\text{O}t\text{Bu}$ ), 48.78 ( $-\text{BocNHCH}_2\text{CO}-$ ), 44.28 ( $-\text{NHCH}_2\text{CO}-$ ), 28.28 ( $-t\text{Bu}$ ), 25.47 ( $-\text{SCH}_2\text{PPh}_2$ ). HR ESI-TOF MS ( $m/z$ ): calcd for  $\text{C}_{22}\text{H}_{28}\text{N}_2\text{O}_4\text{PS}$  [ $\text{M} + \text{H}$ ] $^+$ , 447.1507; found, 447.1503.

### General procedure for peptide-GPI ligation.

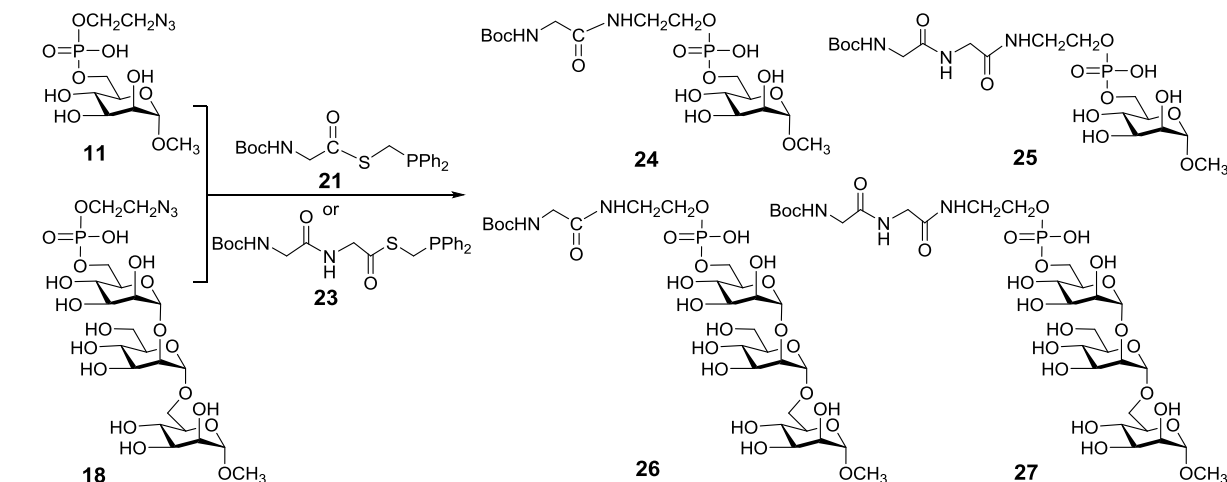

| entry | azide     | thioester | temp ( $^{\circ}\text{C}$ ) | solvent <sup>a</sup>      | time (day) | product   | yield <sup>b</sup> (%) |
|-------|-----------|-----------|-----------------------------|---------------------------|------------|-----------|------------------------|
| 1     | <b>11</b> | <b>21</b> | rt                          | DMF                       | 2          | <b>24</b> | 55                     |
| 2     | <b>11</b> | <b>21</b> | 40                          | DMF                       | 1          | <b>24</b> | 96                     |
| 3     | <b>11</b> | <b>21</b> | 40                          | DMF/ $\text{H}_2\text{O}$ | 1          | <b>24</b> | 93                     |
| 4     | <b>11</b> | <b>23</b> | 40                          | DMF                       | 1          | <b>25</b> | 93                     |
| 5     | <b>11</b> | <b>23</b> | 40                          | DMF/ $\text{H}_2\text{O}$ | 1          | <b>25</b> | 92                     |
| 6     | <b>18</b> | <b>21</b> | 40                          | DMF                       | 1          | <b>26</b> | 93                     |
| 7     | <b>18</b> | <b>21</b> | 40                          | DMF/ $\text{H}_2\text{O}$ | 1          | <b>26</b> | 91                     |
| 8     | <b>18</b> | <b>23</b> | 40                          | DMF                       | 1          | <b>27</b> | 92                     |
| 9     | <b>18</b> | <b>23</b> | 40                          | DMF/ $\text{H}_2\text{O}$ | 1          | <b>27</b> | 89                     |

An azide, **11** (5.15 mg, 0.015 mmol) or **18** (10.2 mg, 0.015 mmol) and a thioester, **21** (8.8 mg, 0.023 mmol) or **23** (10.1 mg, 0.023 mmol) were dissolved in DMF (0.5 mL) or DMF/ $\text{H}_2\text{O}$  (1/1, v/v, 0.5 mL). After stirring at 40  $^{\circ}\text{C}$  for 1 day, the solution was concentrated under vacuum. The residue was purified by silica gel column chromatography to give **24**, **25**, **26**, and **27**, respectively (their yields are shown in Table 1)

**24**: a white foamy solid (6.83 mg, 96%, entry 2).  $R_f = 0.50$  (EtOAc/ $\text{CH}_3\text{OH}$  1:1);  $^1\text{H}$  NMR (600 MHz,  $\text{D}_2\text{O}$ )  $\delta$ : 4.74 (s, 1H, H-1), 4.12 (dd,  $J = 11.4, 5.4$  Hz, 1H, H-6a), 4.05 (dd,  $J = 10.8, 5.4$  Hz, 1H, H-6b), 3.94 – 3.91 (m, 3H,  $-\text{OCH}_2\text{CH}_2$ , H-2), 3.77 – 3.69 (m, 5H,  $-\text{CH}_2\text{NHBoc}$ , H-3, H-4, H-5), 3.46 (s, 2H,  $-\text{OCH}_2\text{CH}_2$ ), 3.39 (s, 3H,  $-\text{OCH}_3$ ), 1.42 (s, 9H,  $-t\text{Bu}$ ).  $^{13}\text{C}$  NMR (150 MHz,  $\text{D}_2\text{O}$ )  $\delta$ :

172.56 (-CONH), 158.00 (-*t*BuOCONH-), 100.83 (C-1), 81.56 (-*Ot*Bu), 71.31, 70.35, 69.74, 66.15, 64.39, 63.96, 54.68 (-OCH<sub>3</sub>), 43.31 (-COCH<sub>2</sub>NHBoc), 39.79 (-OCH<sub>2</sub>CH<sub>2</sub>NH), 27.49 (-*t*Bu). <sup>31</sup>P NMR (160 MHz, D<sub>2</sub>O)  $\delta$ : 0.29. HR ESI-TOF MS (m/z): calcd for C<sub>16</sub>H<sub>30</sub>N<sub>2</sub>O<sub>12</sub>P [M - H]<sup>-</sup>, 473.1542; found, 473.1521.

**25**: a white foamy solid (7.33 mg, 92%, entry 5). *R<sub>f</sub>* = 0.40 (EtOAc/CH<sub>3</sub>OH 1:1); <sup>1</sup>H NMR (600 MHz, D<sub>2</sub>O)  $\delta$ : 4.74 (s, 1H, H-1), 4.12 (dd, *J* = 11.4, 5.4 Hz, 1H, H-6a), 4.05 (dd, *J* = 10.8, 5.4 Hz, 1H, H-6b), 3.93 – 3.91 (m, 5H, -OCH<sub>2</sub>CH<sub>2</sub>-COCH<sub>2</sub>NH-, H-2), 3.81 (s, 2H, -CH<sub>2</sub>NHBoc), 3.76 (dd, *J* = 9.0, 3.6 Hz, 1H, H-3), 3.70 – 3.69 (m, 2H, H-4, H-5), 3.46 (t, *J* = 5.4 Hz, 2H, -OCH<sub>2</sub>CH<sub>2</sub>), 3.39 (s, 3H, -OCH<sub>3</sub>), 1.42 (s, 9H, -*t*Bu). <sup>13</sup>C NMR (150 MHz, D<sub>2</sub>O)  $\delta$ : 173.18 (-CONH), 173.18 (-CONH), 156.94 (-*t*BuOCONH-), 100.81 (C-1), 81.65 (-*Ot*Bu), 71.29, 70.35, 69.74, 66.14, 64.37, 63.91, 54.66 (-OCH<sub>3</sub>), 43.32 (-COCH<sub>2</sub>NHBoc), 42.23 (-COCH<sub>2</sub>NH), 39.88 (-OCH<sub>2</sub>CH<sub>2</sub>NH), 27.47 (-*t*Bu). HR ESI-TOF MS (m/z): calcd for C<sub>18</sub>H<sub>33</sub>N<sub>3</sub>O<sub>13</sub>P [M - H]<sup>-</sup>, 530.1756; found, 530.1728.

**26**: a white foamy solid (11.80 mg, 92%, entry 8). *R<sub>f</sub>* = 0.50 (EtOAc/CH<sub>3</sub>OH 1:2); <sup>1</sup>H NMR (600 MHz, D<sub>2</sub>O)  $\delta$ : 5.12 (s, 1H, H-1<sup>Man-III</sup>), 5.02 (s, 1H, H-1<sup>Man-II</sup>), 4.74 (s, 1H, H-1<sup>Man-I</sup>), 4.11 – 4.02 (m, 3H), 3.98 – 3.92 (m, 6H), 3.86 – 3.84 (m, 3H), 3.82 (d, *J* = 11.4 Hz, 1H), 3.77 – 3.64 (m, 9H), 3.48 (t, *J* = 3.6 Hz, 2H, -OCH<sub>2</sub>CH<sub>2</sub>), 3.39 (s, 3H, -OCH<sub>3</sub>), 1.43 (s, 9H, -*t*Bu). <sup>13</sup>C NMR (150 MHz, D<sub>2</sub>O)  $\delta$ : 172.56 (-CONH), 157.99 (-*t*BuOCONH-), 102.32 (C-1<sup>Man-III</sup>), 100.88 (C-1<sup>Man-I</sup>), 97.80 (C-1<sup>Man-II</sup>), 81.58 (-*Ot*Bu), 78.81, 72.65, 71.98, 70.65, 70.12, 69.81, 66.76, 66.54, 66.24, 65.75, 64.65, 64.01, 60.80, 60.03, 54.69 (-OCH<sub>3</sub>), 43.34 (-COCH<sub>2</sub>NHBoc), 39.88 (-OCH<sub>2</sub>CH<sub>2</sub>NH), 27.53 (-*t*Bu). <sup>31</sup>P NMR (160 MHz, D<sub>2</sub>O)  $\delta$ : 0.50. HR ESI-TOF MS (m/z): calcd for C<sub>28</sub>H<sub>50</sub>N<sub>2</sub>O<sub>22</sub>P [M - H]<sup>-</sup>, 797.2598; found, 797.2605.

**27**: a white foamy solid (6.83 mg, 96%, entry 2). *R<sub>f</sub>* = 0.45 (EtOAc/CH<sub>3</sub>OH 1:2); <sup>1</sup>H NMR (600 MHz, D<sub>2</sub>O)  $\delta$ : 5.12 (s, 1H, H-1<sup>Man-III</sup>), 5.02 (s, 1H, H-1<sup>Man-II</sup>), 4.74 (s, 1H, H-1<sup>Man-I</sup>), 4.11 – 4.03 (m, 3H), 3.99 – 3.92 (m, 7H), 3.87 – 3.79 (m, 6H), 3.77 – 3.63 (m, 8H), 3.48 (t, *J* = 5.4 Hz, 2H, -OCH<sub>2</sub>CH<sub>2</sub>), 3.39 (s, 3H, -OCH<sub>3</sub>), 1.43 (s, 9H, -*t*Bu). <sup>13</sup>C NMR (150 MHz, D<sub>2</sub>O)  $\delta$ : 173.16 (-CONH), 171.34 (-CONH), 159.88 (-*t*BuOCONH-), 102.31 (C-1<sup>Man-III</sup>), 100.88 (C-1<sup>Man-I</sup>), 97.79 (C-1<sup>Man-II</sup>), 81.69 (-*Ot*Bu), 78.80, 72.64, 72.02, 70.64, 70.12, 69.81, 66.76, 66.54, 66.24, 65.73, 64.57, 63.91, 60.79, 60.03, 54.69 (-OCH<sub>3</sub>), 43.36 (-COCH<sub>2</sub>NHBoc), 42.28 (-COCH<sub>2</sub>NH), 39.93 (-OCH<sub>2</sub>CH<sub>2</sub>NH), 27.52 (-*t*Bu). <sup>31</sup>P NMR (160 MHz, D<sub>2</sub>O)  $\delta$ : 0.56. HR ESI-TOF MS (m/z): calcd for C<sub>30</sub>H<sub>53</sub>N<sub>3</sub>O<sub>23</sub>P [M - H]<sup>-</sup>, 854.2813; found, 854.2810.

## Synthesis of CD52 peptide phosphinothioesters **32** and **33**.

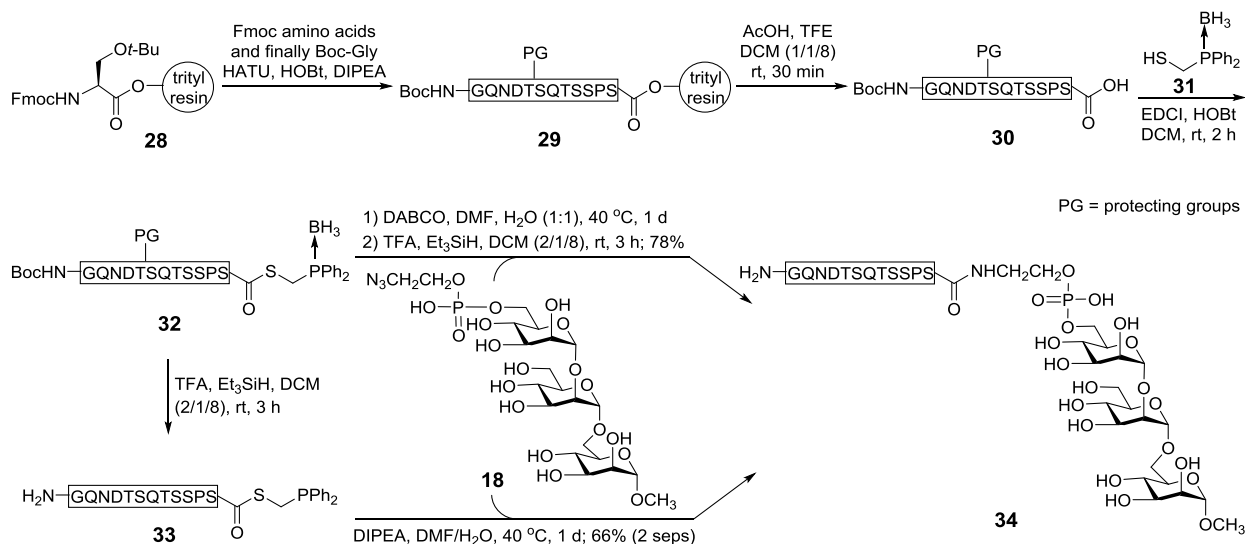

CD52 peptide **30** was prepared by solid-phase synthesis on a peptide synthesizer using standard Fmoc chemistry. The synthesis started from commercial serine-modified 2-chlorotrytil resin **28**, and the completed peptide **30** was released from the resin with 10% AcOH in TFE and DCM (1/1/8 v/v/v). The product was purified by silica gel column chromatography (CH<sub>3</sub>OH/CH<sub>2</sub>Cl<sub>2</sub> 1:5) and characterized with MALDI-TOF MS (calcd for C<sub>135</sub>H<sub>179</sub>N<sub>15</sub>O<sub>26</sub>Na [M + Na]<sup>+</sup>, 2449.3; found, 2449.8). Peptide **30** (86 mg, 0.035 mmol) was then dissolved in CH<sub>2</sub>Cl<sub>2</sub> (2 mL), and to the solution were added mercaptan **31** (13.08 mg, 0.053 mmol), EDCI (20.16 mg, 0.106 mmol), and HOBT (9.45 mg, 0.07 mmol) at rt. After stirring at rt for 2 h, the mixture was concentrated, and the residue was purified by silica gel column chromatography (CH<sub>3</sub>OH/CH<sub>2</sub>Cl<sub>2</sub> 1:10) to produce **32** (87.5 mg, 93%) as a white solid. MALDI-TOF MS: calcd for C<sub>135</sub>H<sub>179</sub>N<sub>15</sub>O<sub>26</sub>Na [M – BH<sub>3</sub> + Na]<sup>+</sup>, 2663.3; found, 2663.5.

To a solution of **32** (87.5 mg, 0.033 mmol) in CH<sub>2</sub>Cl<sub>2</sub> (1.6 mL) were added TFA (0.4 mL) and Et<sub>3</sub>SiH (0.2 mL). After stirring at rt for 3 h, the mixture was poured into cold ethyl ether (20 mL). The precipitated product **33** was filtered, dried under vacuum, and applied directly to the next step. MALDI-TOF MS: calcd for C<sub>58</sub>H<sub>83</sub>N<sub>15</sub>O<sub>23</sub>PS [M – H]<sup>-</sup>, 1420.5; found, 1420.7.

**Staudinger ligation between **32** and **18**.** To a solution of **32** (2.3 mg, 0.87 nmol) and **18** (0.85 mg, 1.30 nmol) in DMF and H<sub>2</sub>O (1:1, v/v, 300 μL) was added DABCO (0.3 mg, 2.60 nmol). After stirring at 40 °C for 1 day and MS indication of completed reaction, the mixture was concentrated under vacuum. The residue was dissolved in 20% TEA in Et<sub>3</sub>SiH and DCM (2/1/8, v/v/v, 0.5 mL). After stirring at rt for 3 h, 5 mL of cold ether was added to the mixture to precipitate the



reaction product, which was finally purified by reversed-phase HPLC to afford **34** (1.24 mg, 78%) as a white solid. HPLC conditions: C18 column (5  $\mu\text{m}$ , 250 x 4.6 mm), gradient elution with 10~60%  $\text{CH}_3\text{CN}$  in  $\text{H}_2\text{O}$ , 1.5 mL/min flow rate, UV detection at 220 nm, retention time 9.5 min. MALDI-TOF MS: calcd for  $\text{C}_{66}\text{H}_{110}\text{N}_{16}\text{O}_{42}\text{P}$   $[\text{M} - \text{H}]^-$ , 1829.7; found, 1829.9.

**Staudinger ligation between 33 and 18.** To a solution of **33** (1.5 mg, 1.05 nmol) and **18** (1.1 mg, 1.60 nmol) in DMF and  $\text{H}_2\text{O}$  (1:1, v/v, 0.5 mL) was added DIPEA (1.84  $\mu\text{L}$ , 10.5 nmol). After stirring at 40  $^\circ\text{C}$  for 1 day, the mixture was concentrated and the product was purified by HPLC as described above to give **34** (1.24 mg, 66%) as a white solid (identical to the product obtained from the above procedure).

## II. MS spectra and HPLC diagrams of CD52 peptide, its phosphinothioesters, and its GPI conjugate

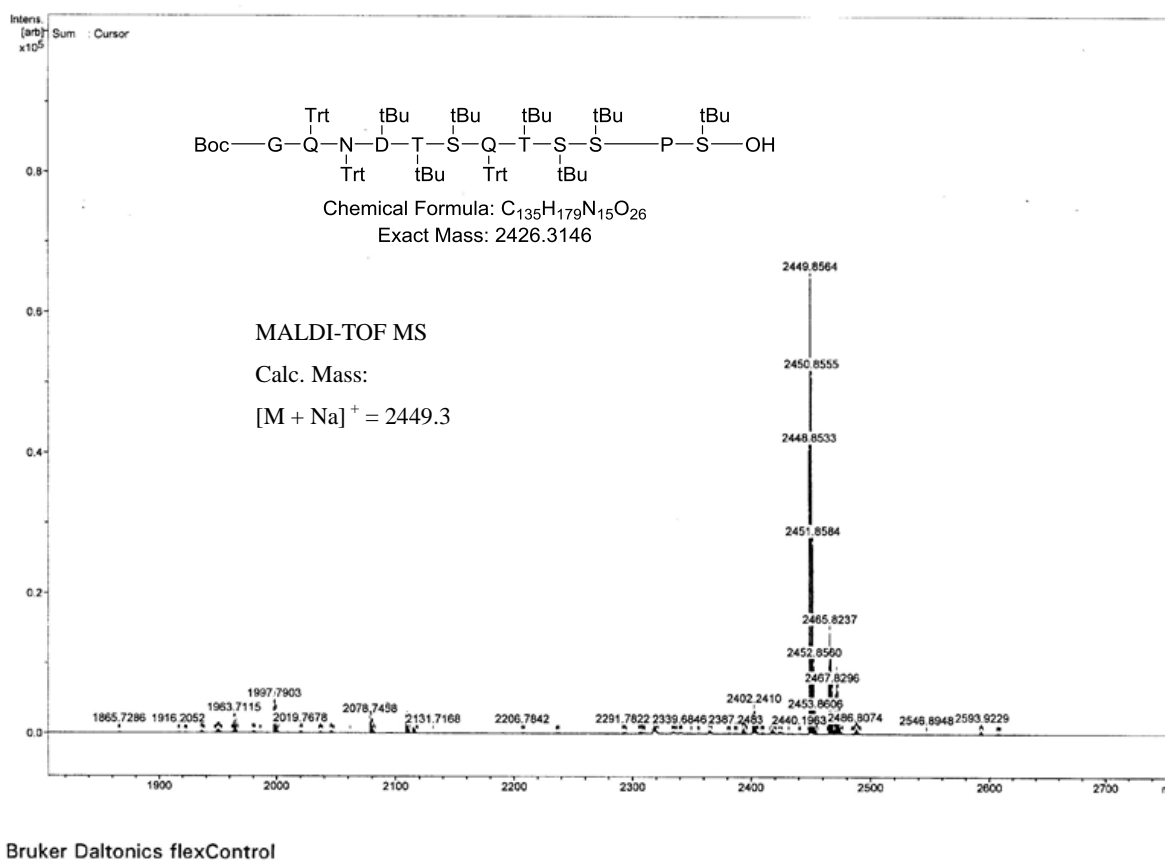

**Figure S1.** MALDI-TOF MS spectrum of the peptide **30** obtained from solid-phase synthesis

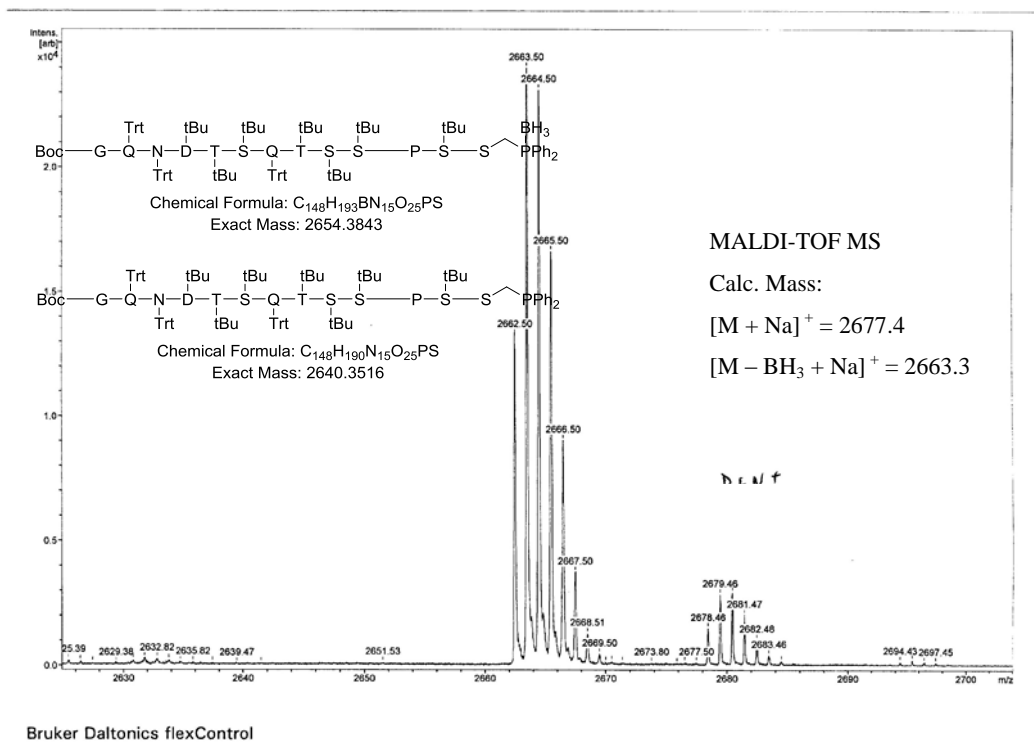

Figure S2. MALDI-TOF MS spectrum of peptide phosphinothioester **32**

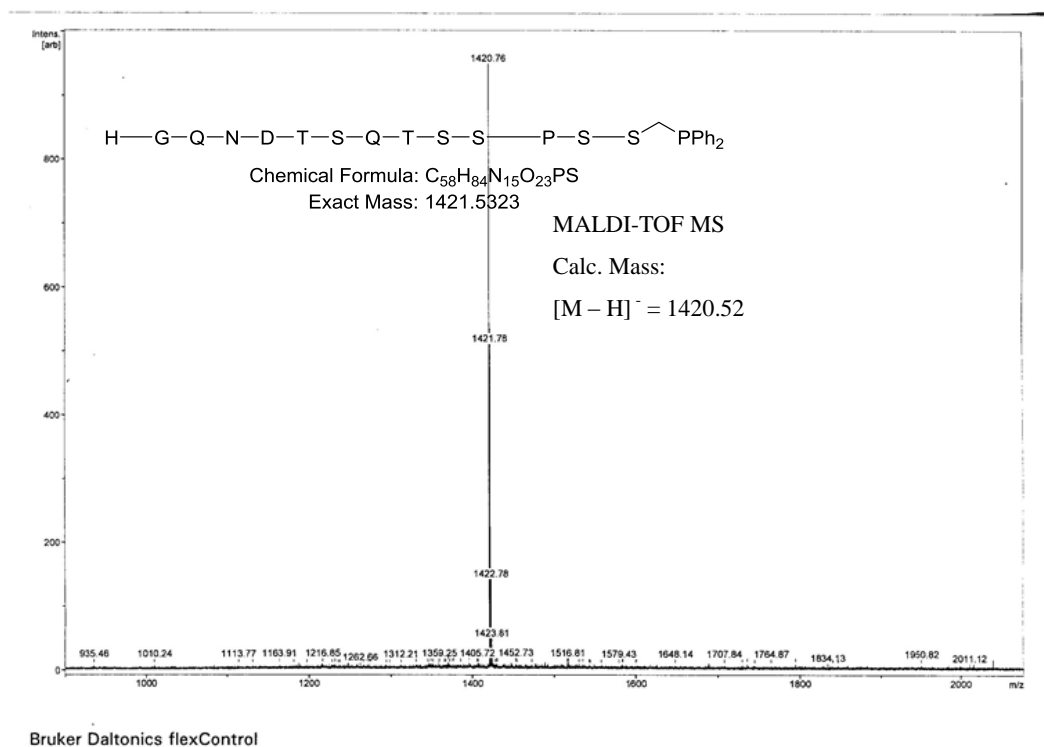

Figure S3. MALDI-TOF MS spectrum of peptide phosphinothioester **33**

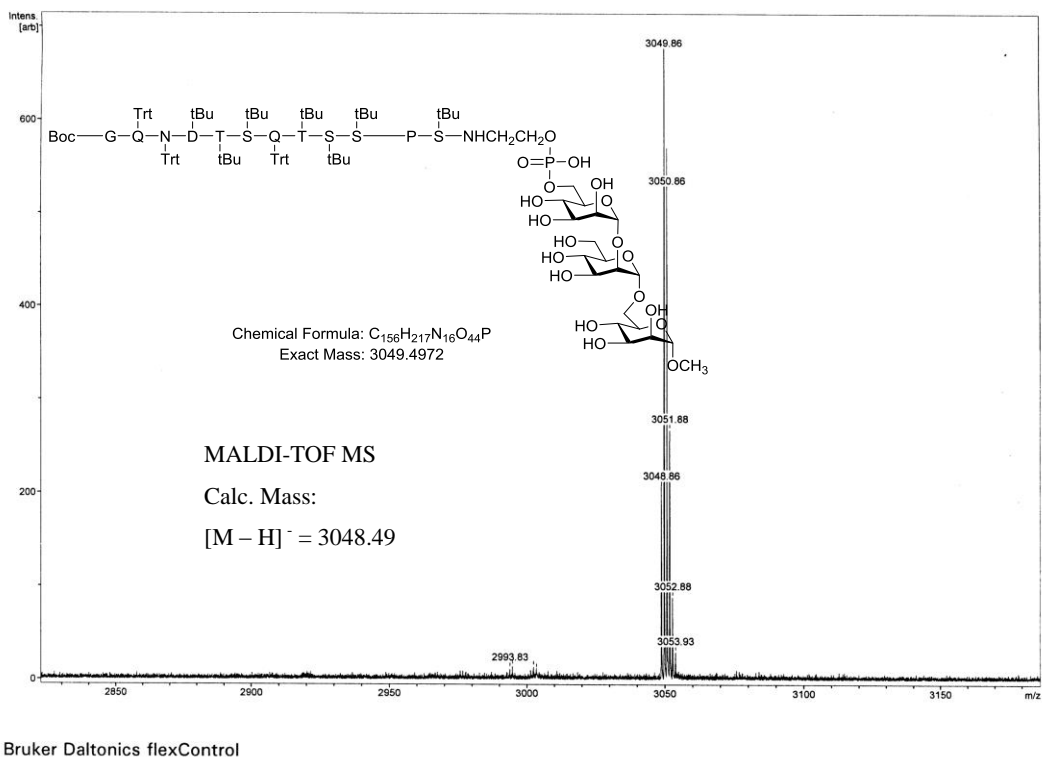

**Figure S4.** MALDI-TOF MS spectrum of the reaction product of **18** and **32** (i.e., protected **34**)

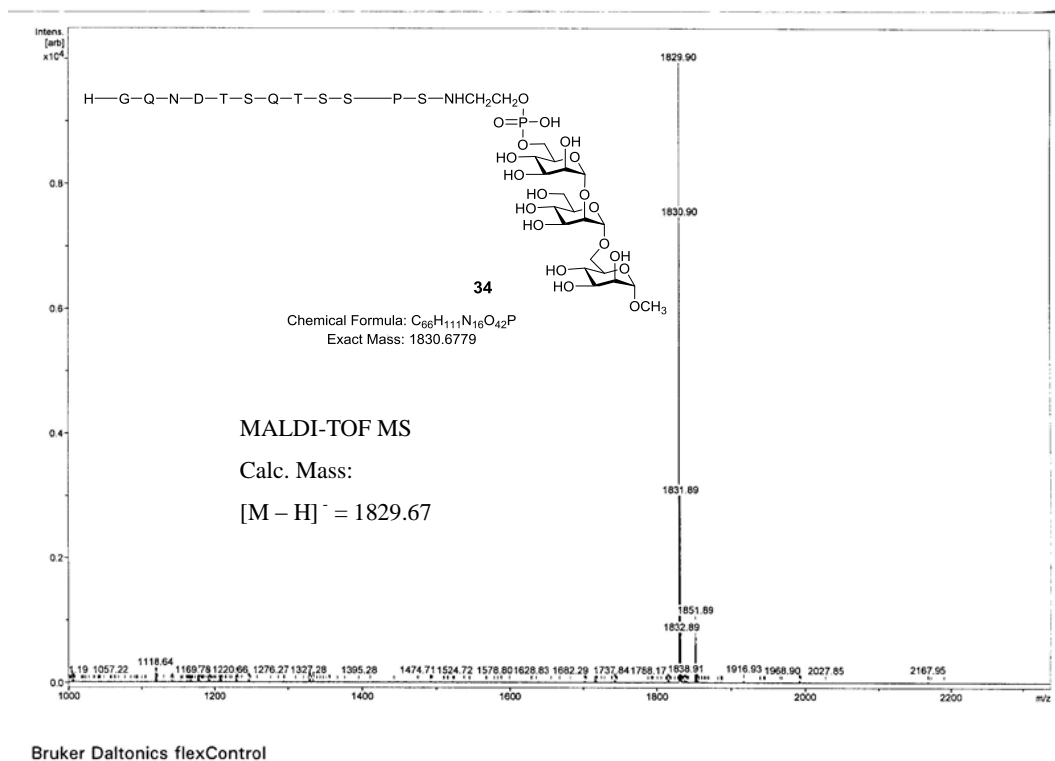

**Figure S5.** MALDI-TOF MS spectrum of CD52 analog **34**

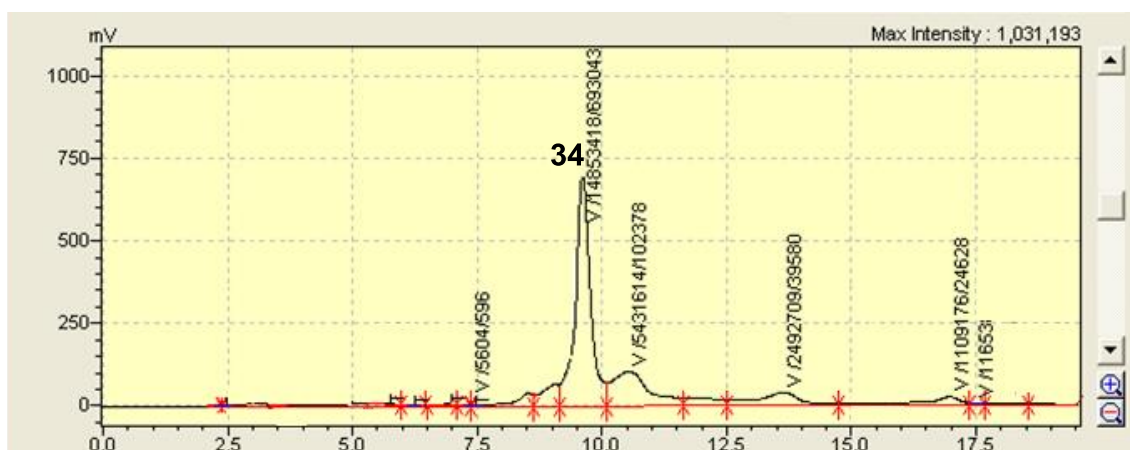

**Figure S6.** HPLC diagram of **34** derived from **18** and **32** (after the deprotection step). C18 column (5  $\mu$ m, 250 x 4.6 mm); gradient eluent: 10-60% CH<sub>3</sub>CN in H<sub>2</sub>O; flow rate: 1.5 mL/min, UV detection at 220 nm.

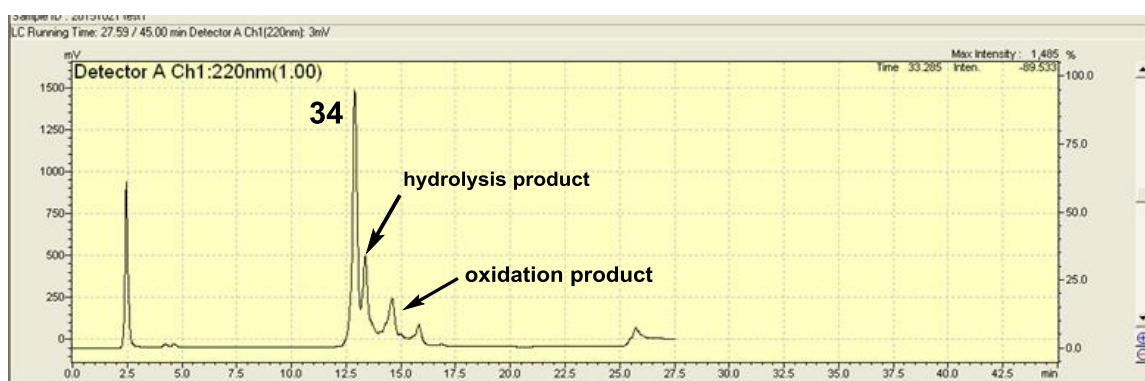

**Figure S7.** HPLC diagram of **34** derived from **18** and **33**. C18 column (5  $\mu$ m, 250 x 4.6 mm); gradient eluent: 5-60% CH<sub>3</sub>CN in H<sub>2</sub>O; flow rate: 1.5 mL/min, UV detection at 220 nm.

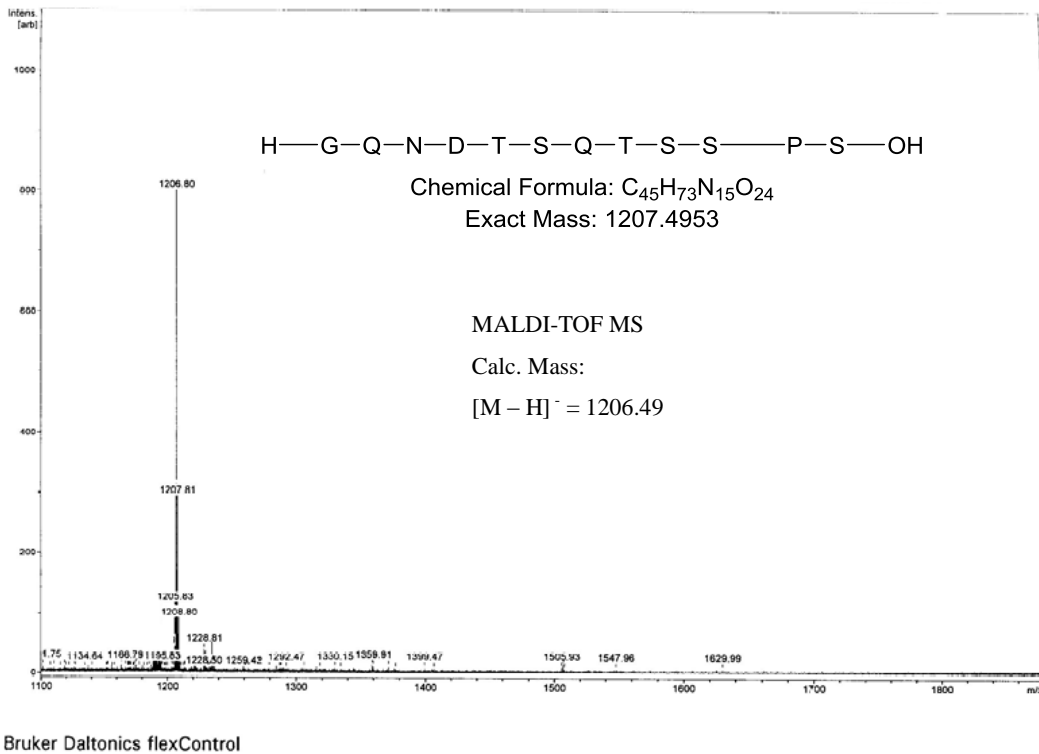

**Figure S8.** MALDI-TOF MS spectrum of the hydrolysis product of **33**

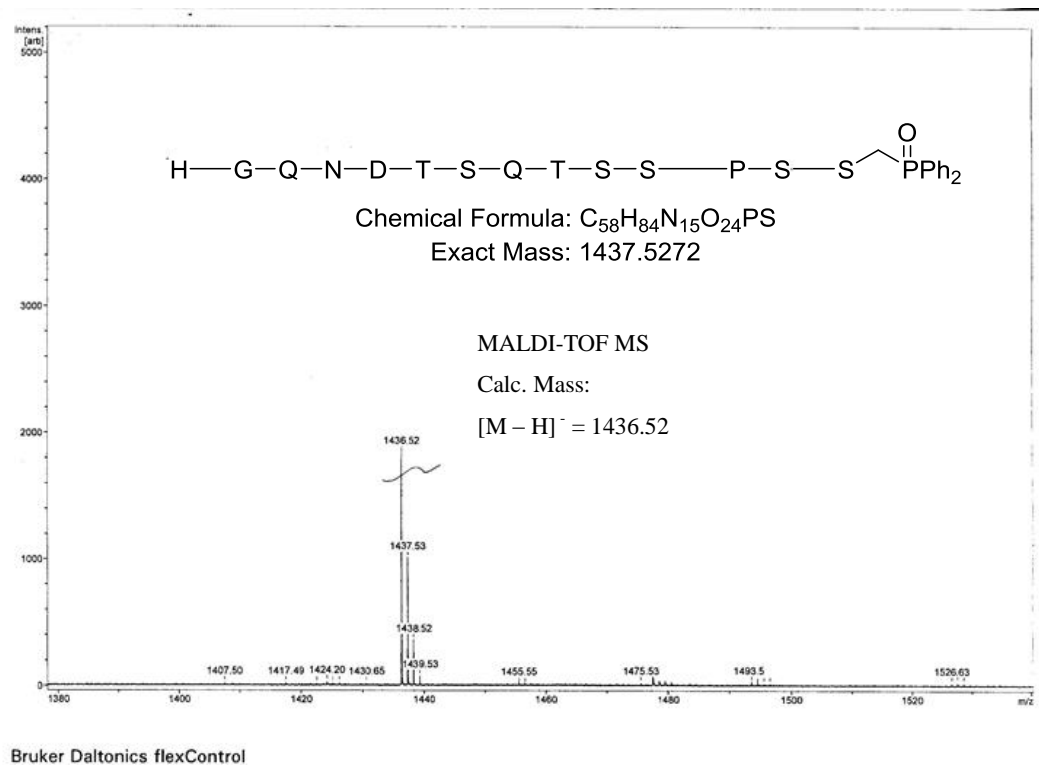

**Figure S9.** MALDI-TOF MS spectrum of the oxidation product of **33**

### III. NMR and MS spectra of synthetic intermediates and other GPI-peptide conjugates

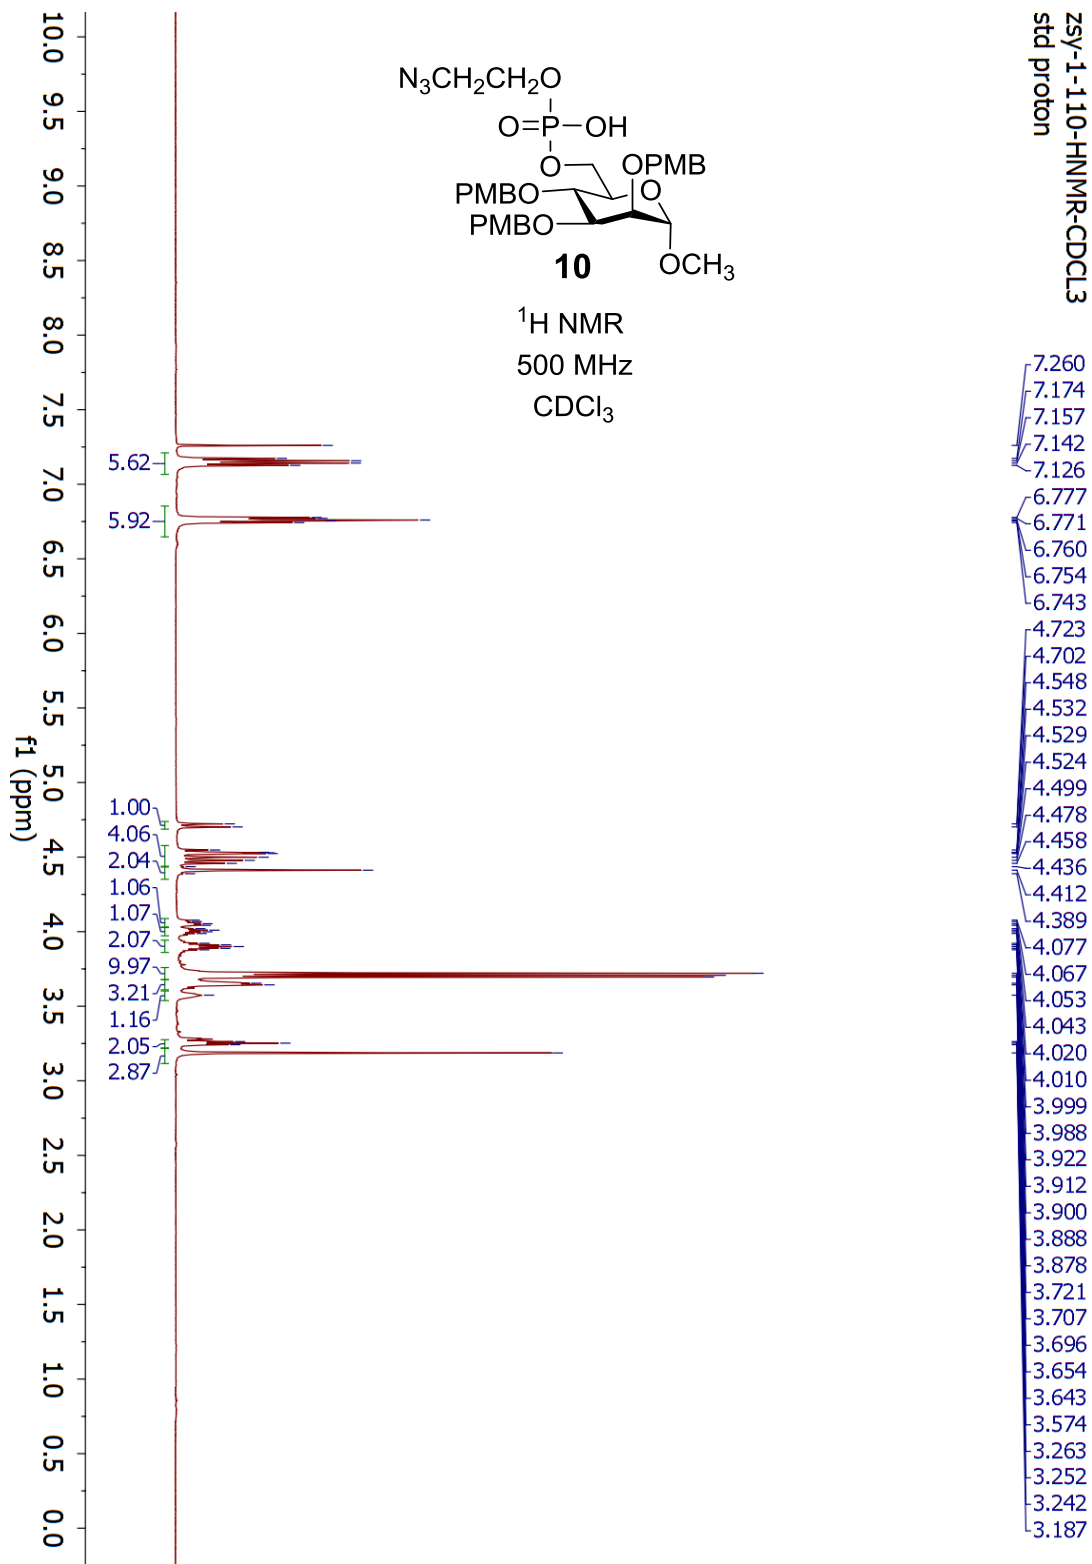

zsy-1-110-CNMR-CDCL3  
standard carbon

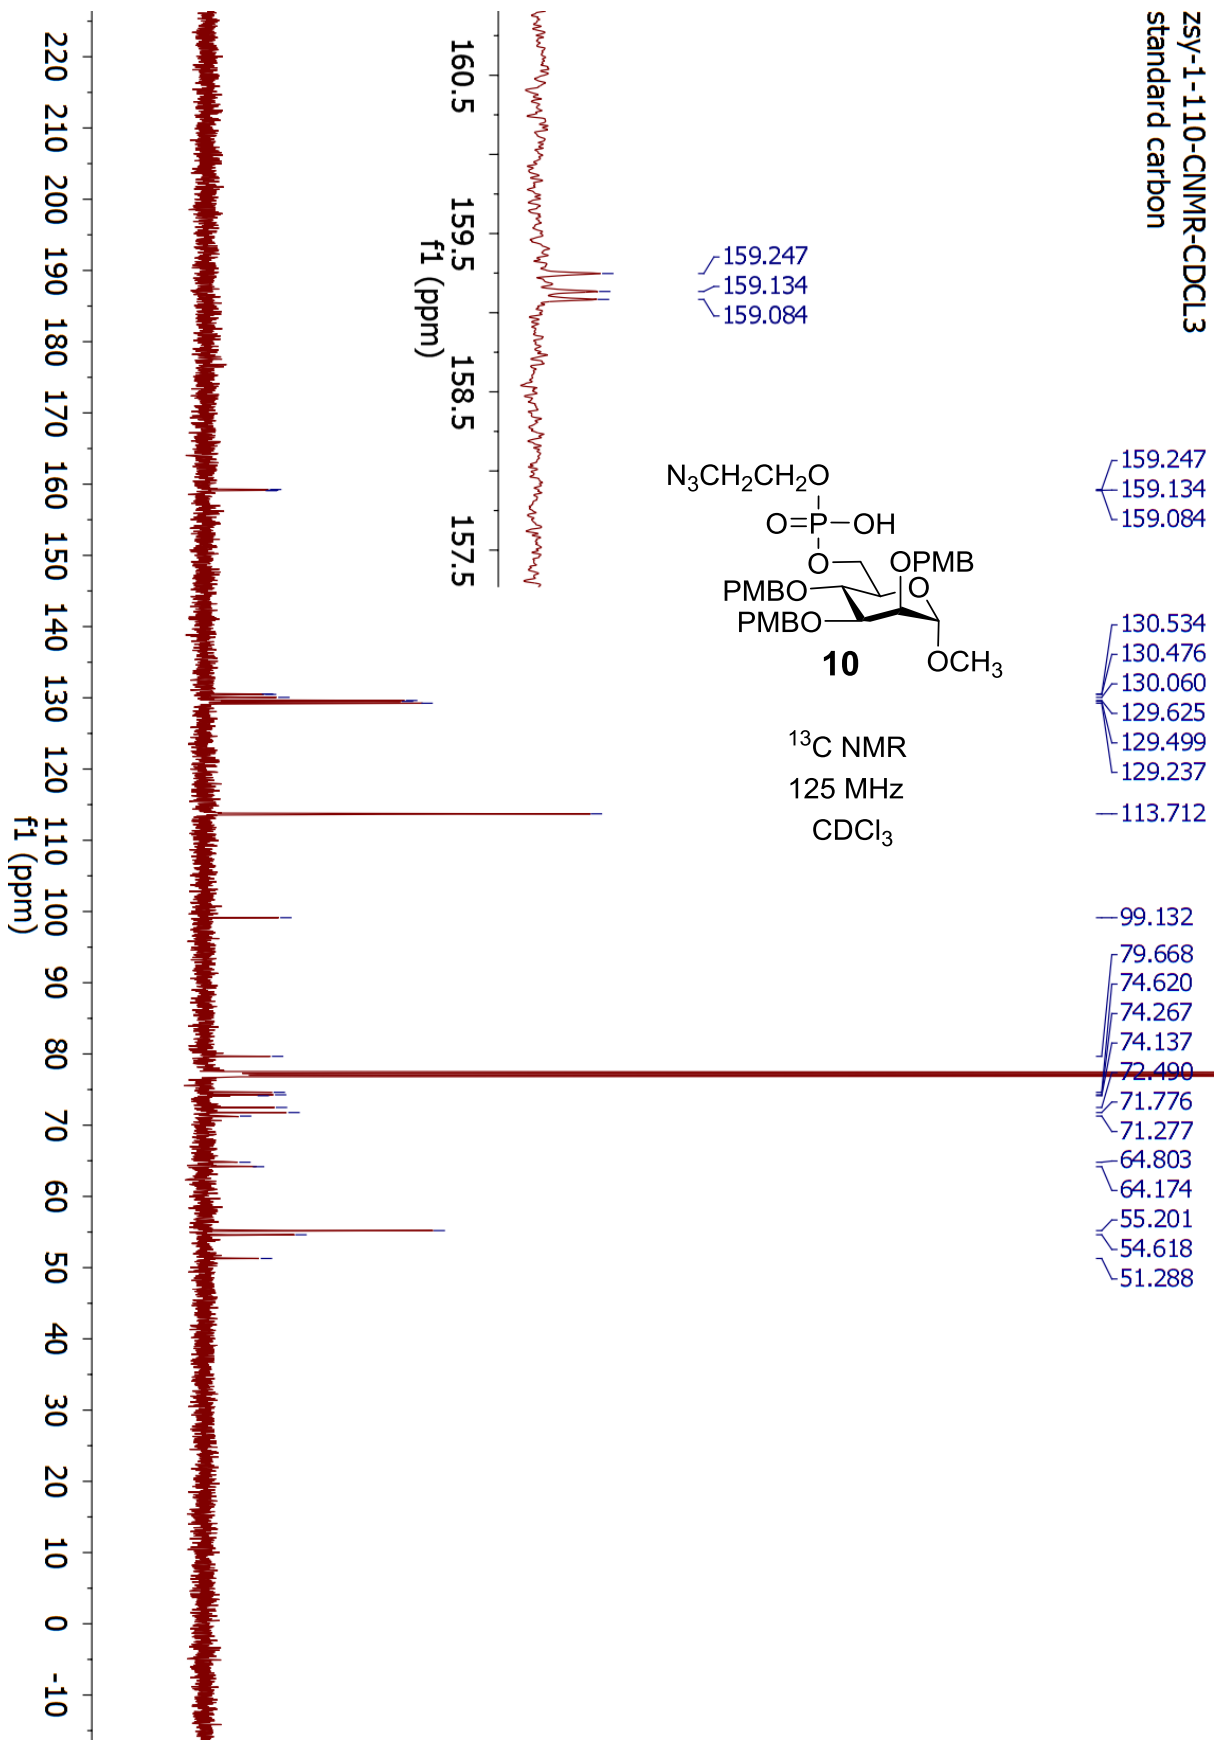

zsy-1-110-PNMR-CDCl3  
P31 spectrum

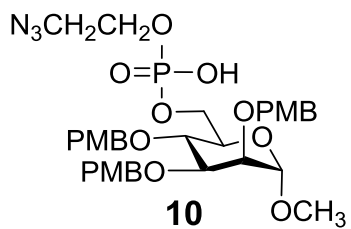

<sup>31</sup>P NMR  
160 MHz  
CDCl<sub>3</sub>

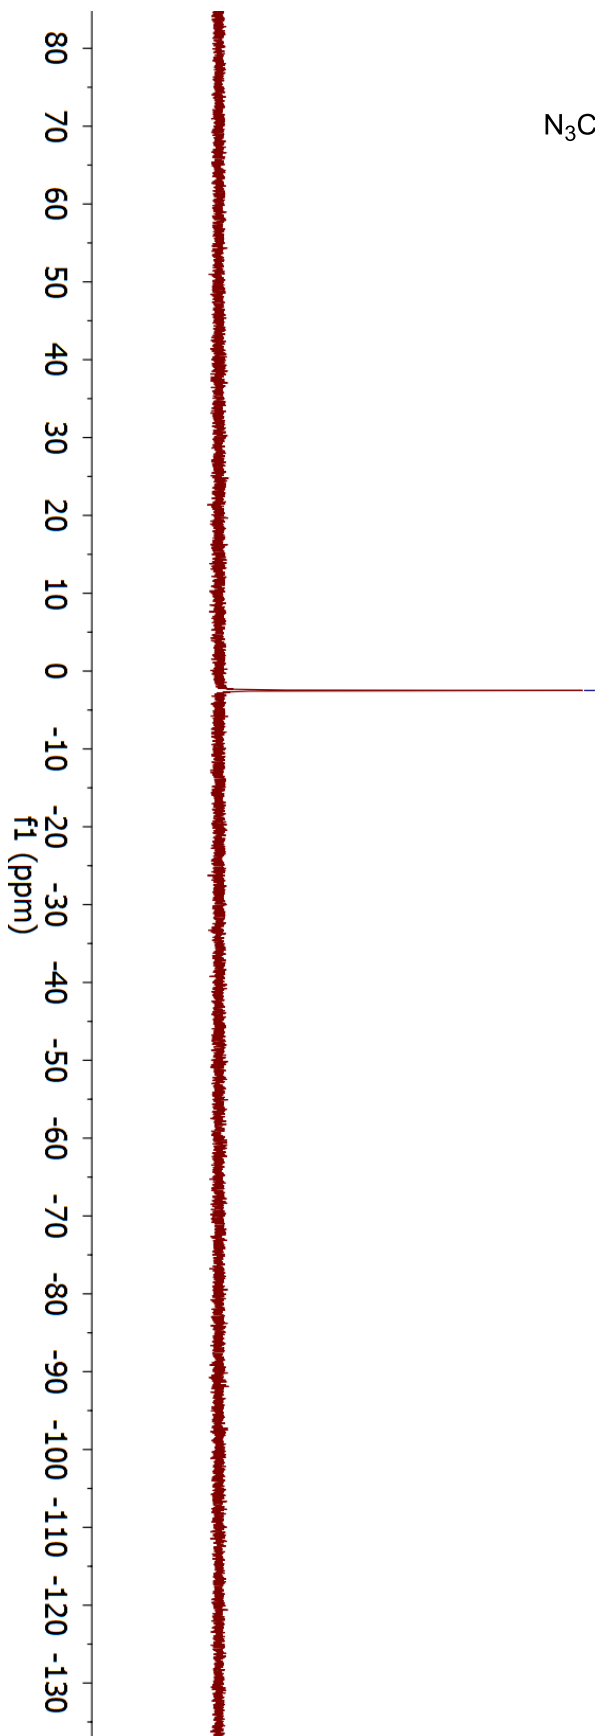

—2.491



ZSY-1-110-gcosy-cdcl3  
File: xp  
Pulse Sequence: gcosy

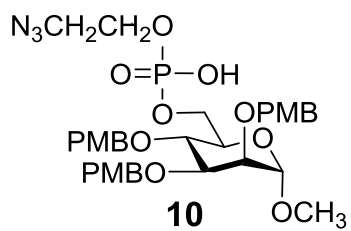

$^1\text{H}$ - $^1\text{H}$  COSY  
500 MHz  
 $\text{CDCl}_3$

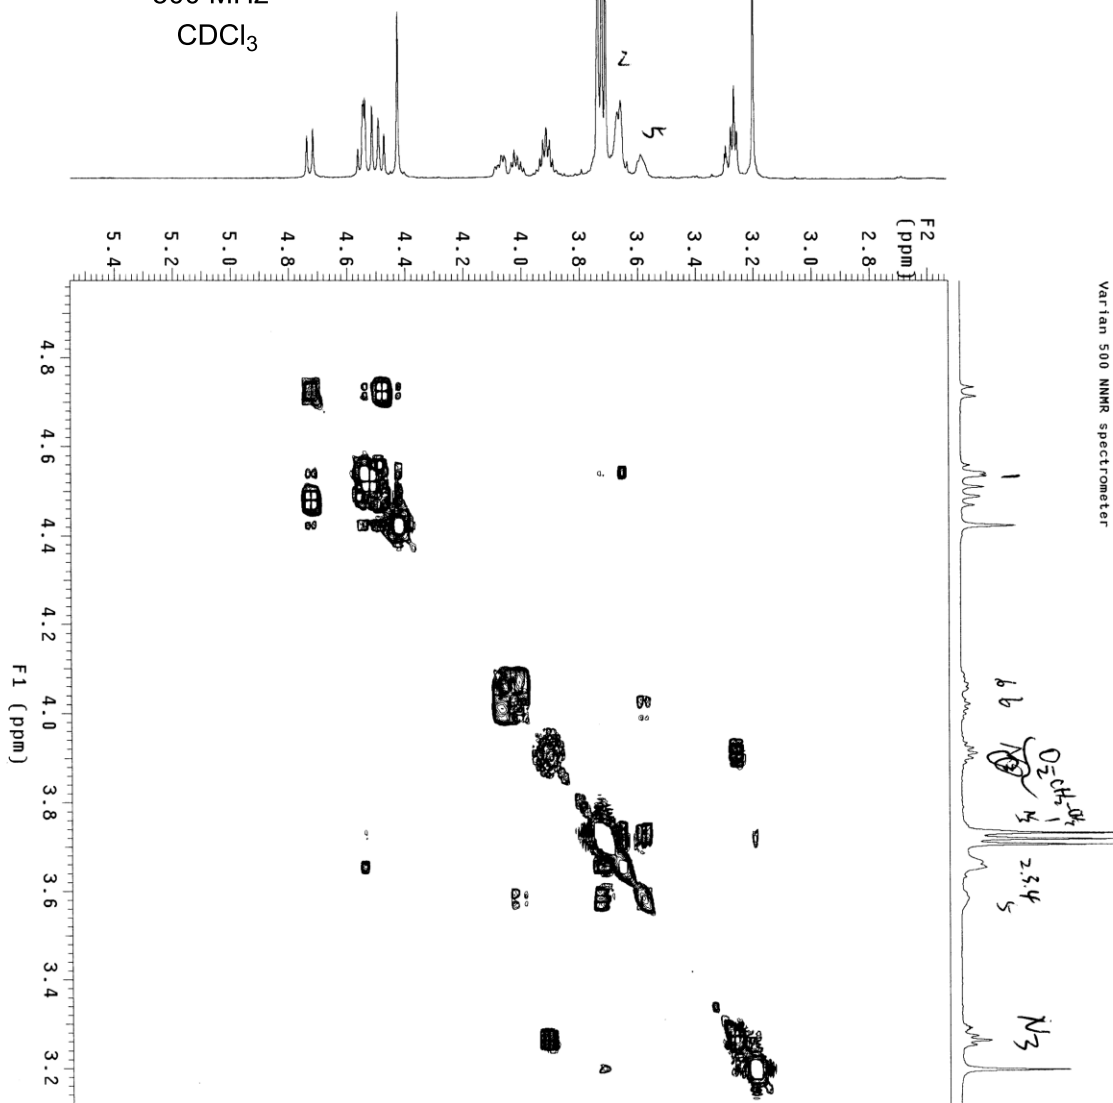

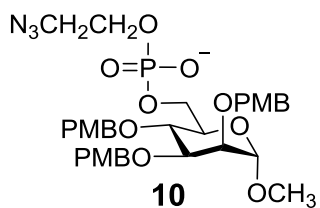

Exact Mass: 702.2433

HR ESI-TOF MS

Calc. Mass:

[M - H]<sup>-</sup> = 702.2433

### Elemental Composition Report

#### Single Mass Analysis

Tolerance = 5.0 PPM / DBE: min = -1.5, max = 100.0

Element prediction: Off

Number of isotope peaks used for i-FIT = 6

Monoisotopic Mass, Even Electron Ions

225 formula(e) evaluated with 1 results within limits (all results (up to 1000) for each mass)

Elements Used:

C: 33-33 H: 0-50 N: 0-5 O: 0-20 31P: 0-1

LCT Premier KD128  
TOF MS ES-

S.Zhu ZSY-1-110 inMeOH Cone(V)50

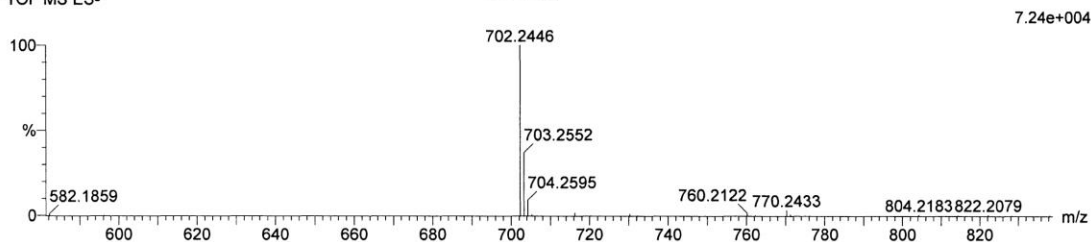

| Mass     | Calc. Mass | mDa | PPM | DBE  | i-FIT | i-FIT (Norm) | Formula               |
|----------|------------|-----|-----|------|-------|--------------|-----------------------|
| 702.2446 | 702.2428   | 1.8 | 2.6 | 15.5 | 51.8  | 0.0          | C33 H41 N3 O12<br>31P |

zsy-1-111-HNMR-CD3OD  
Standard\_proton

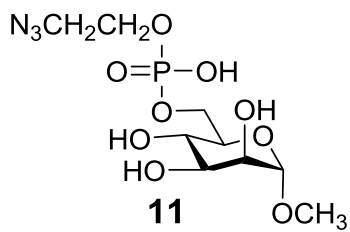

<sup>1</sup>H NMR  
600 MHz  
CD<sub>3</sub>OD

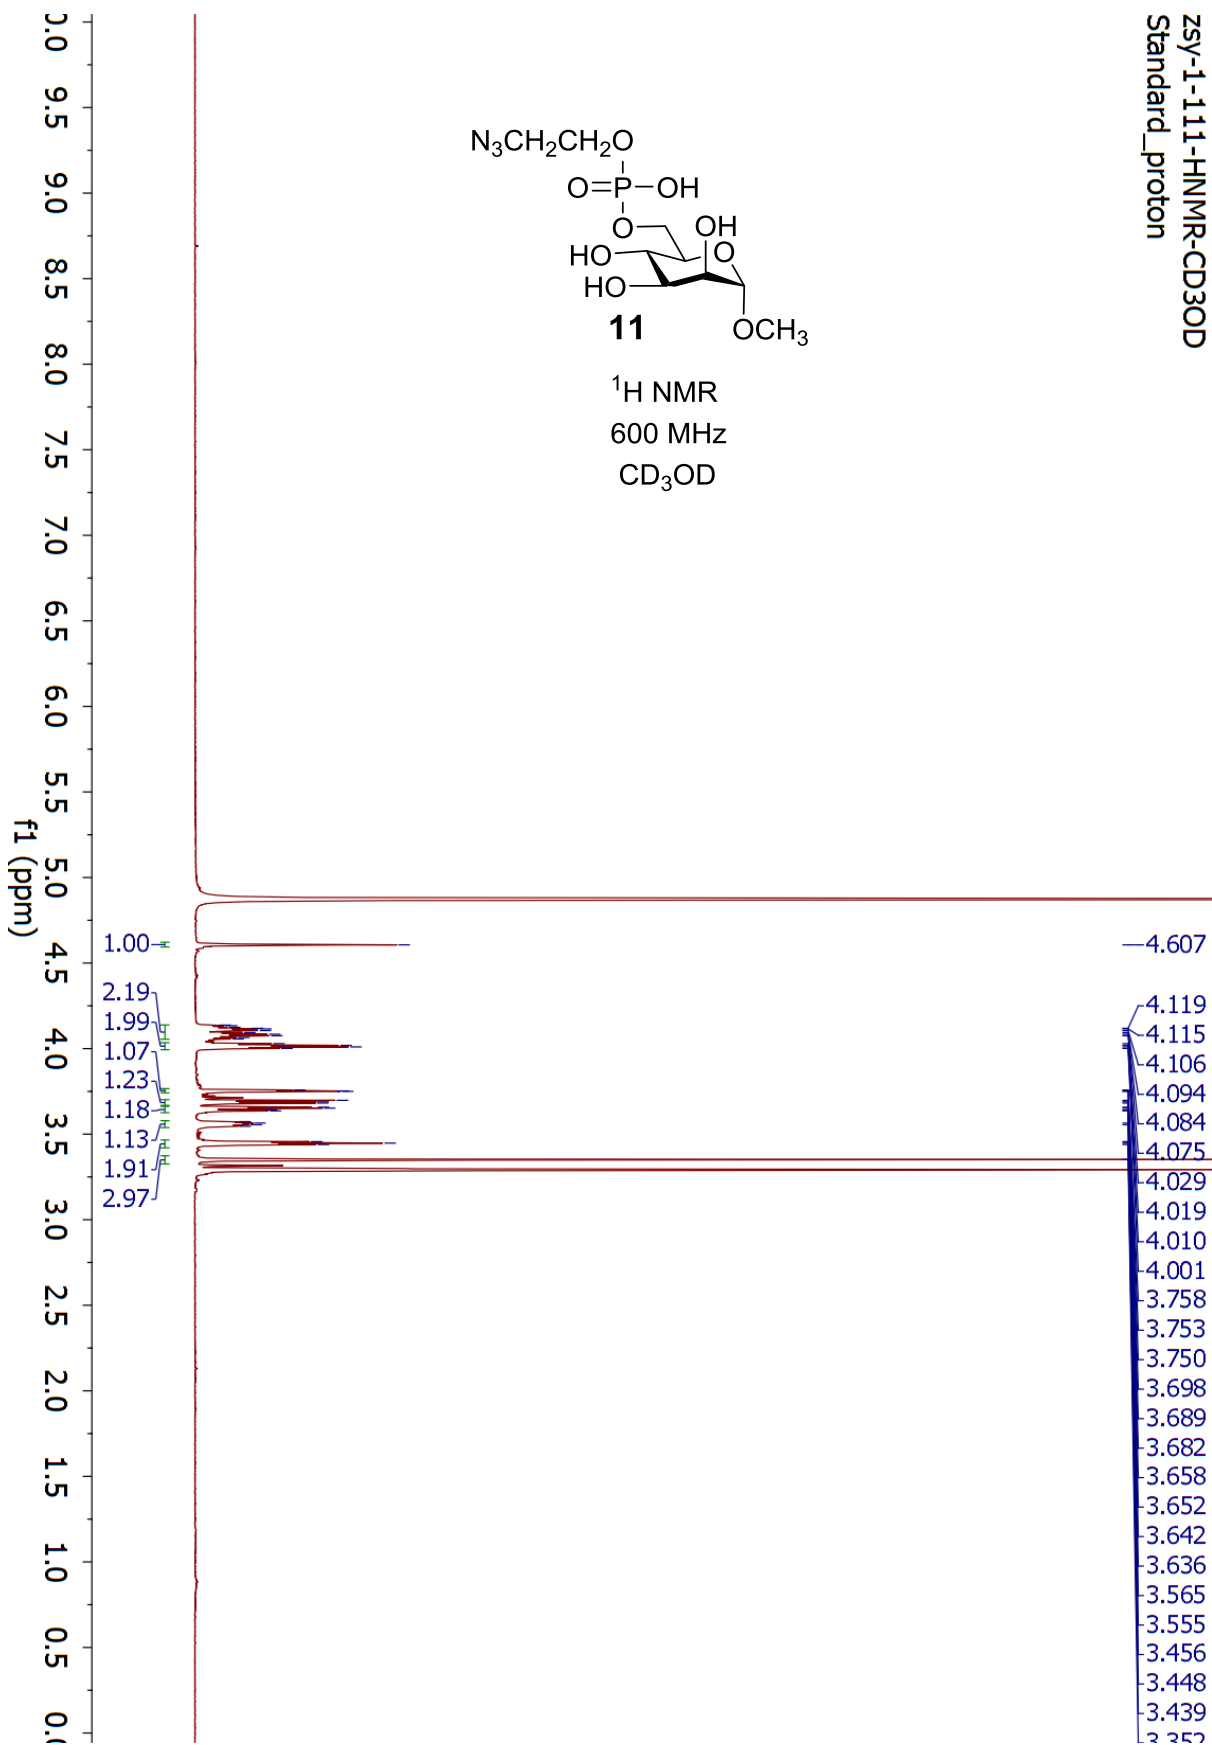

zsy-1-111-CNMR-CD3OD  
Standard Carbon

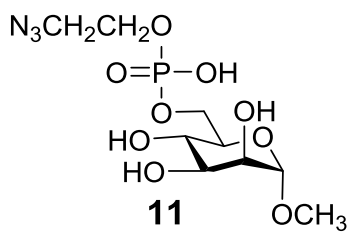

$^{13}\text{C}$  NMR  
150 MHz  
 $\text{CD}_3\text{OD}$

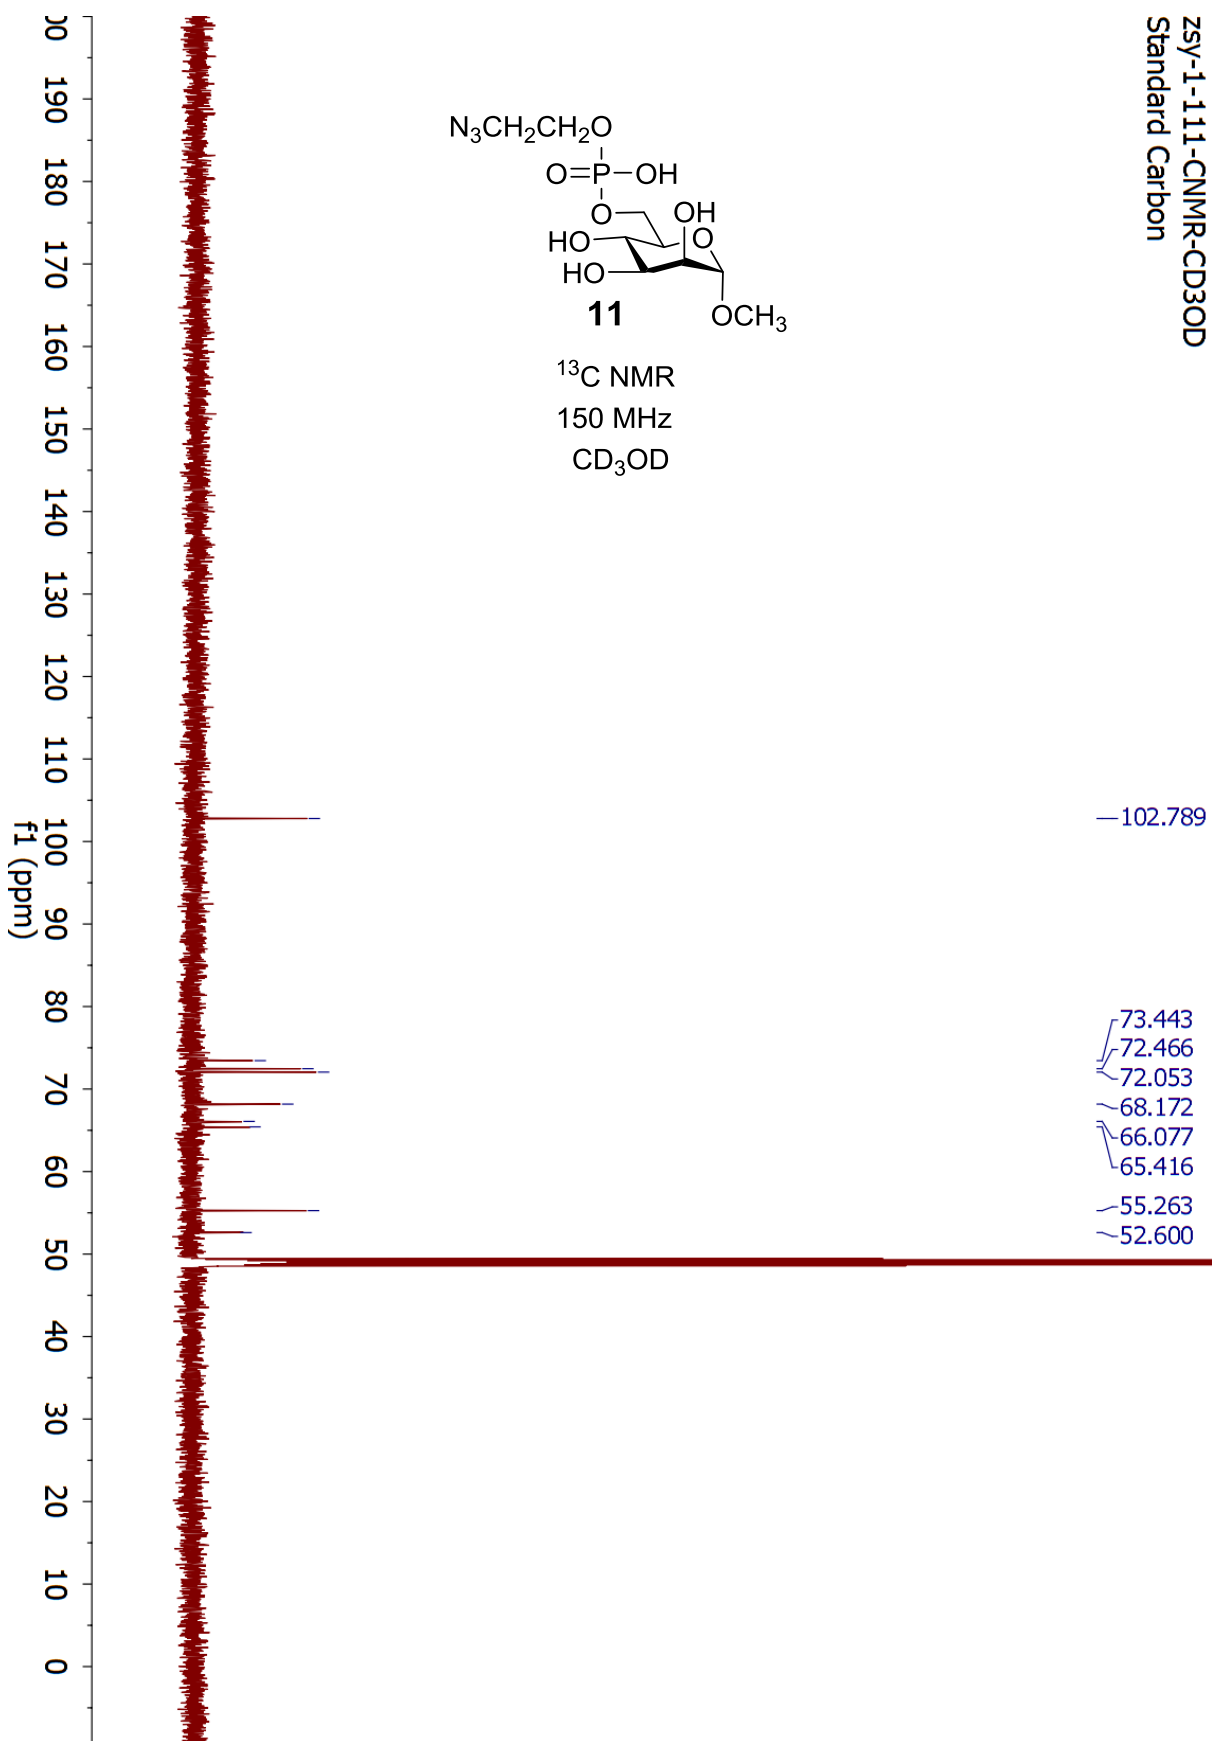

zsy-1-111-PNMR-CD3OD  
P31 spectrum

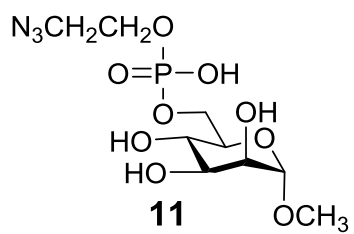

<sup>31</sup>P NMR  
160 MHz  
CD<sub>3</sub>OD

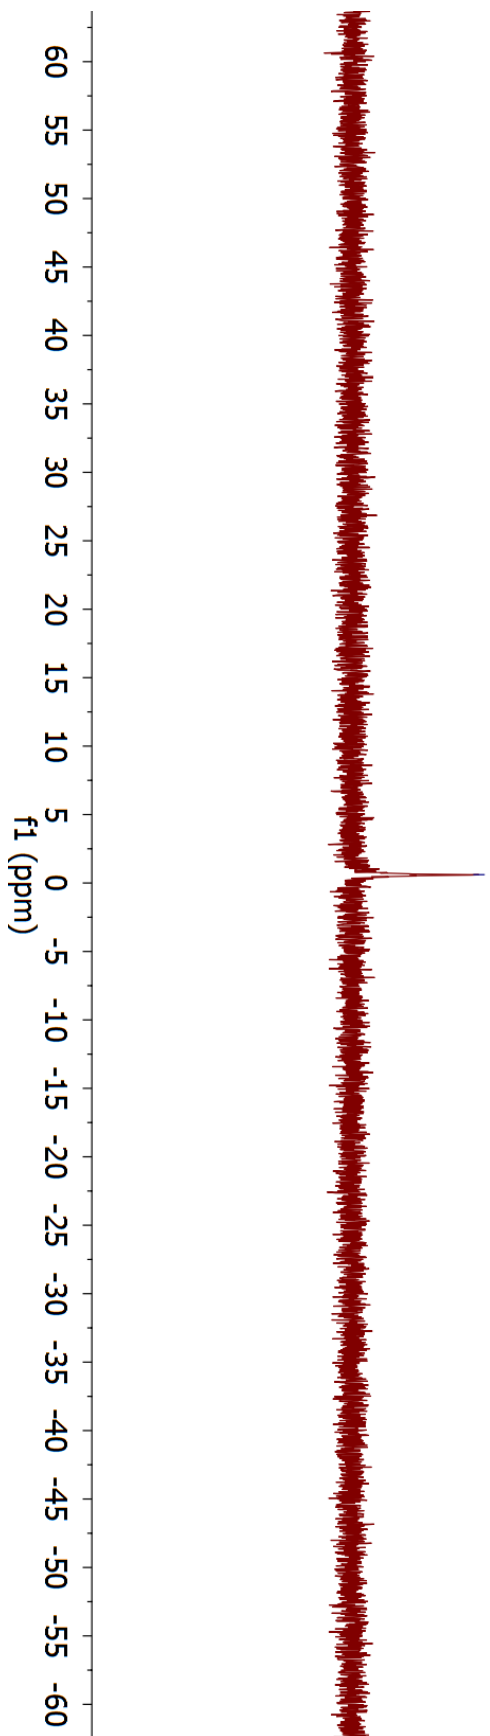

—0.609

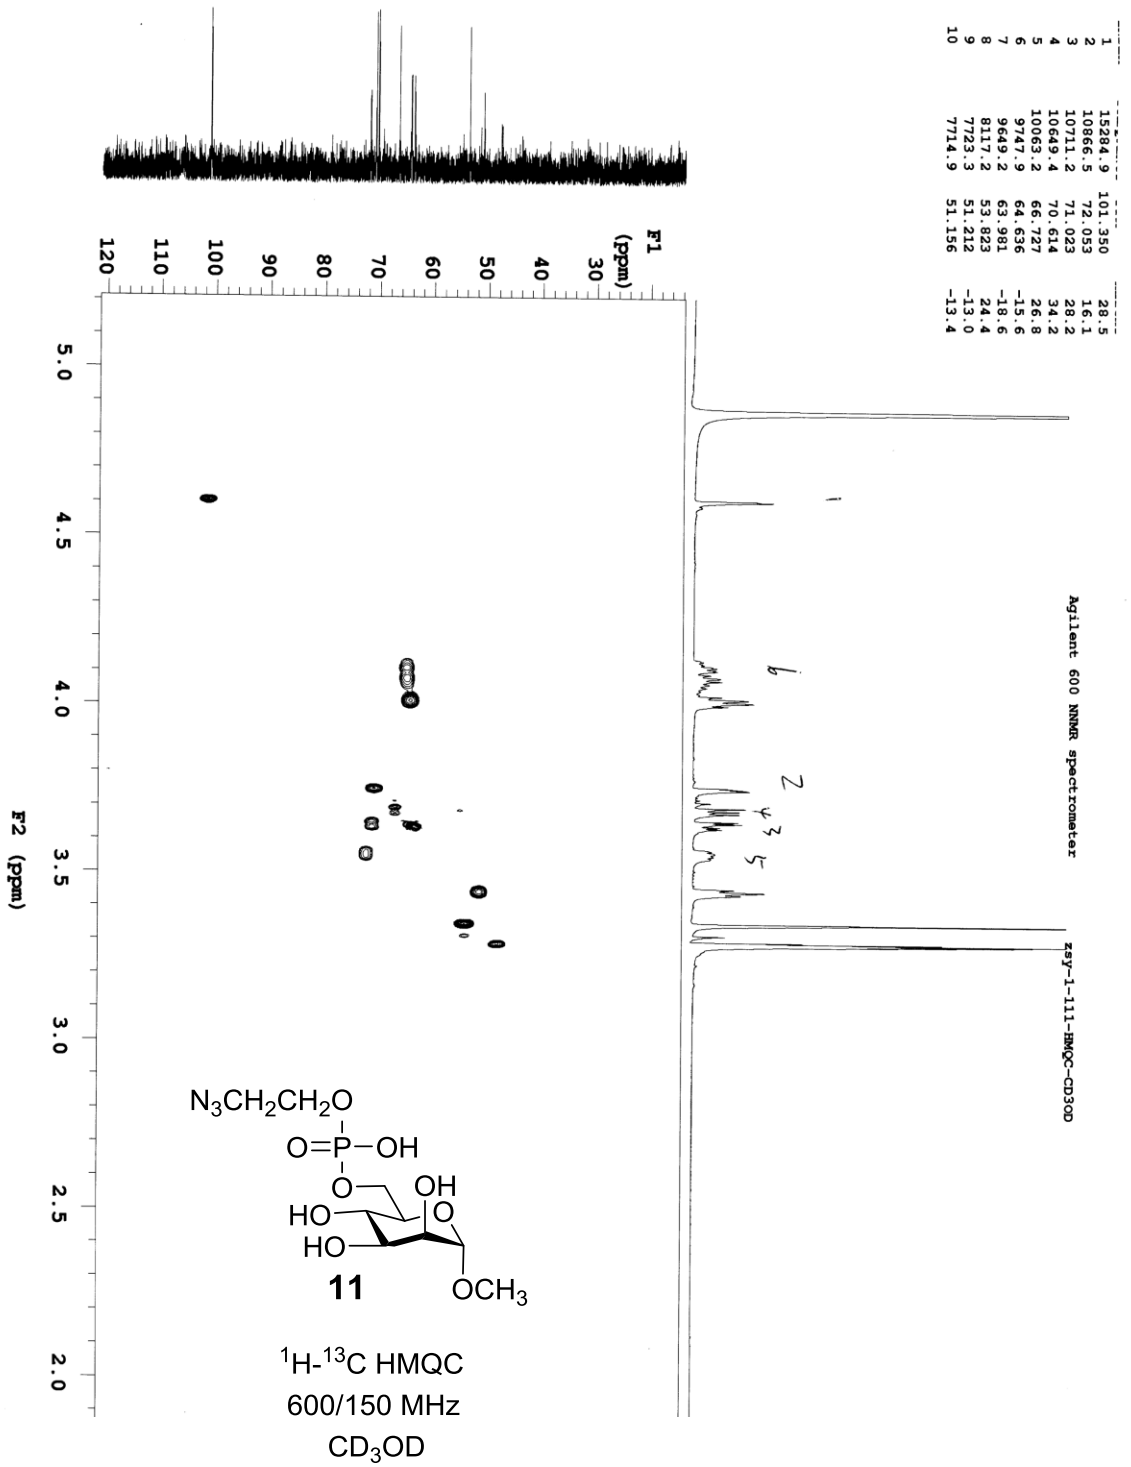

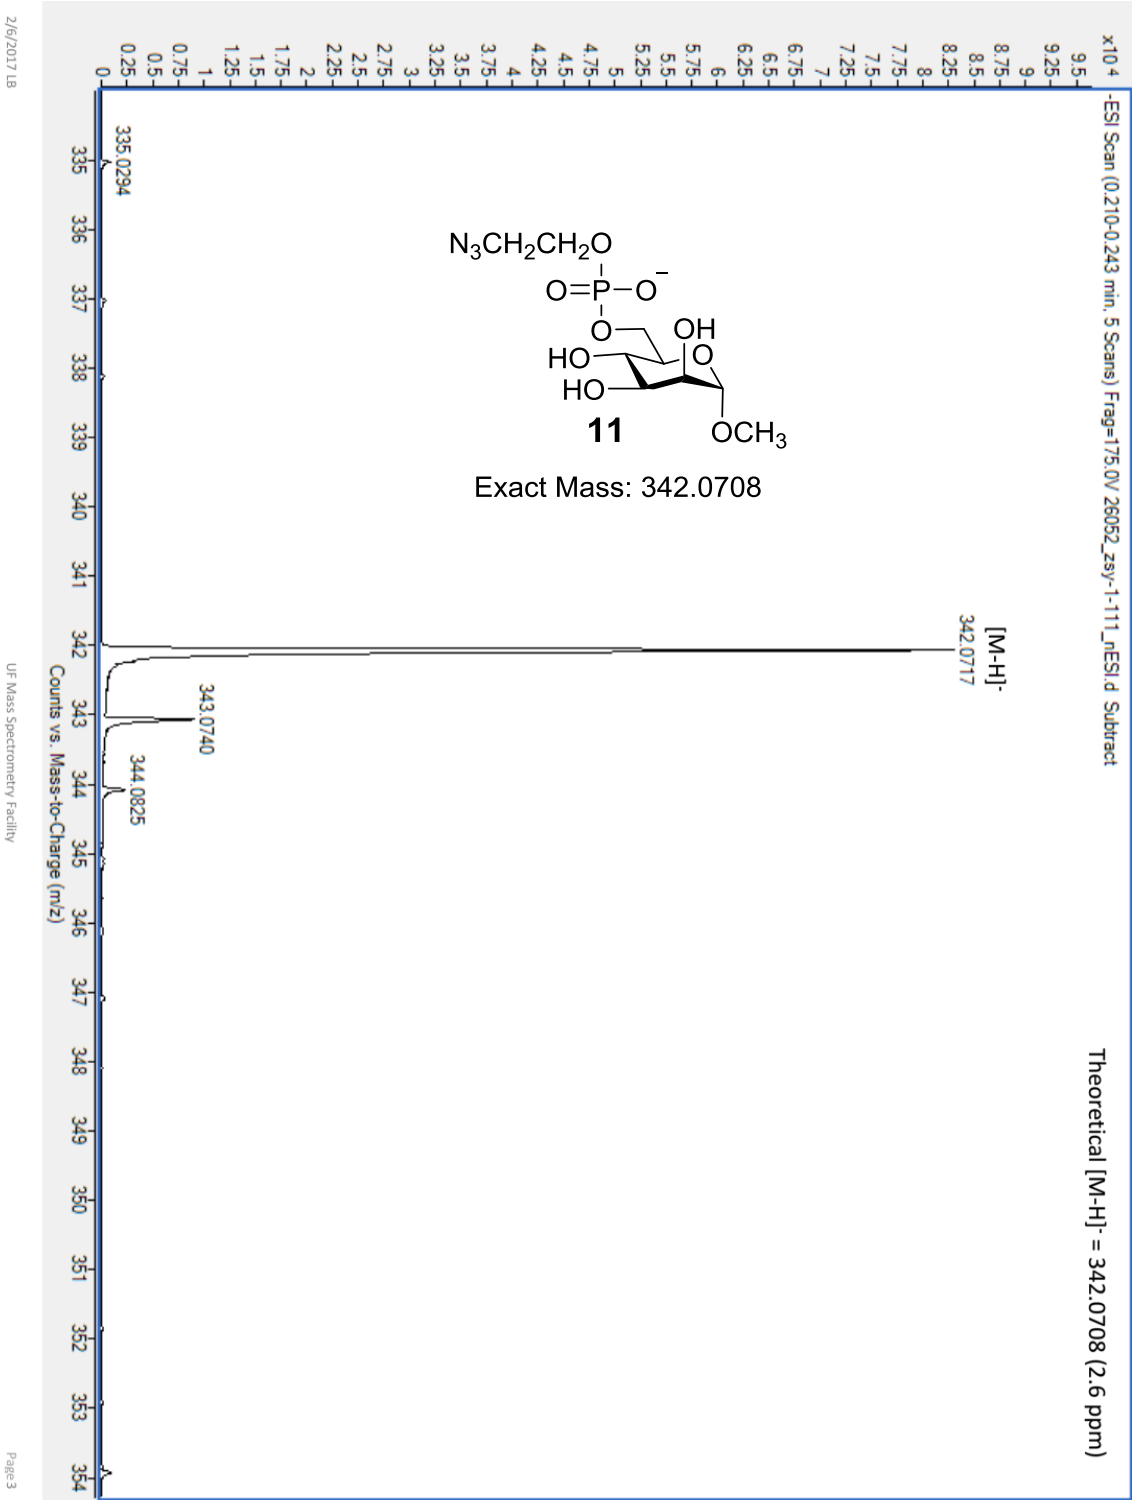

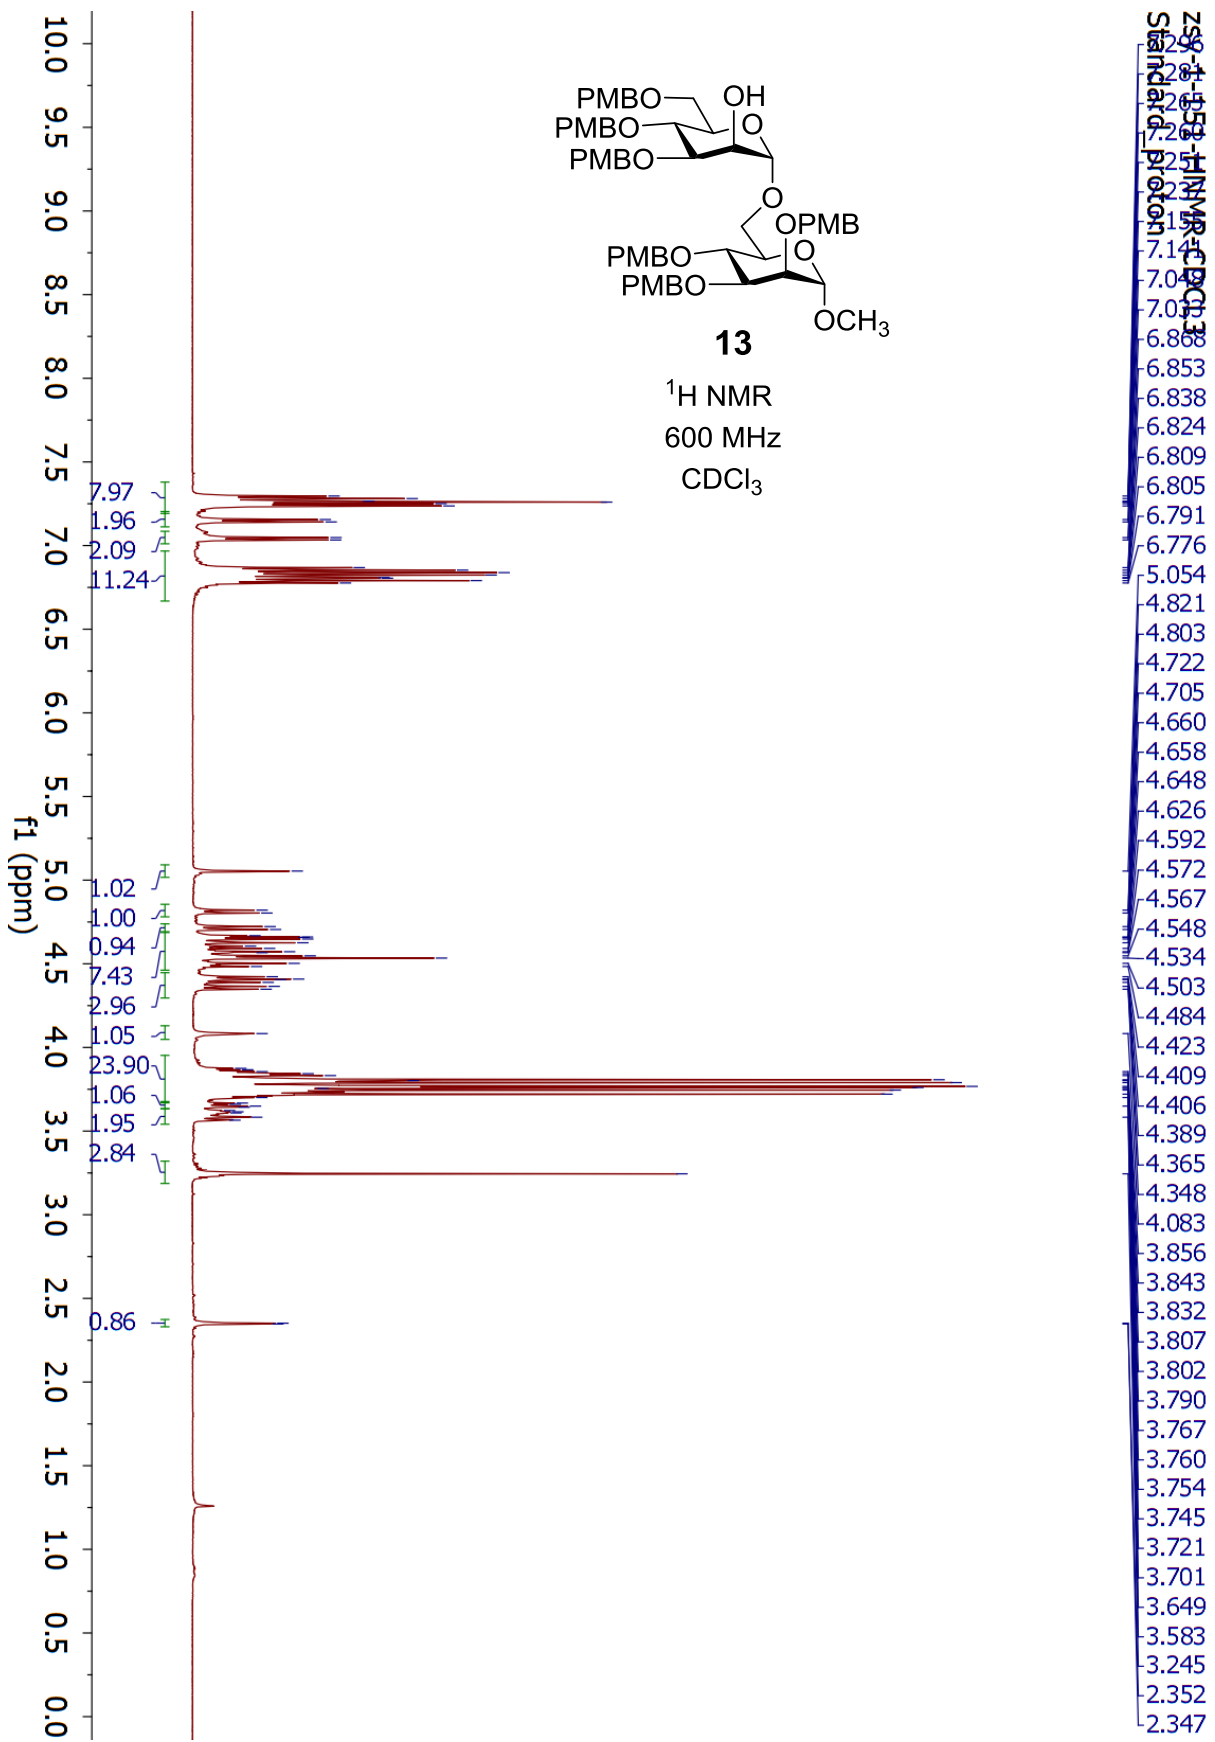



zsy-1-151-CNMR-CDCL3  
Standard Carbon

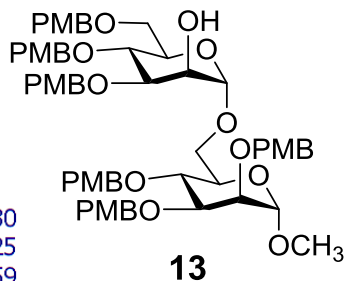

<sup>13</sup>C NMR  
150 MHz  
CDCl<sub>3</sub>

- 159.430
- 159.325
- 159.259
- 159.234
- 130.860
- 130.824
- 130.534
- 130.110
- 129.774
- 129.696
- 129.650
- 129.528
- 129.400
- 113.991
- 113.875
- 113.855
- 113.807
- 113.762
- 99.777
- 98.884
- 80.069
- 79.184
- 74.837
- 74.773
- 74.485
- 74.446
- 74.032
- 73.078
- 72.444
- 71.832
- 71.500
- 71.138
- 68.558
- 68.163
- 66.484
- 55.405
- 55.393
- 55.369
- 55.341
- 55.312
- 54.749

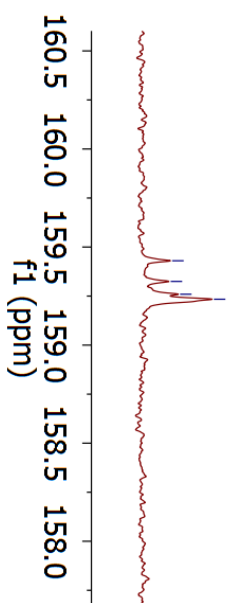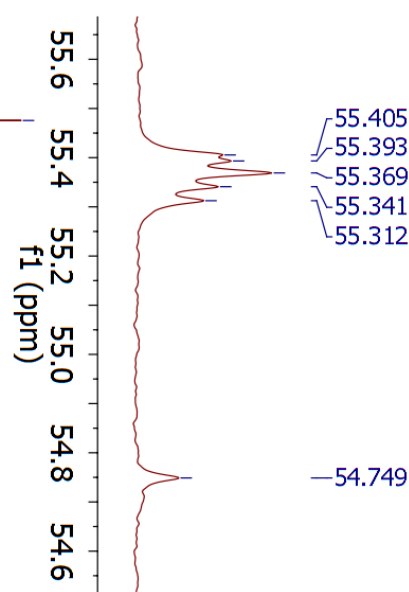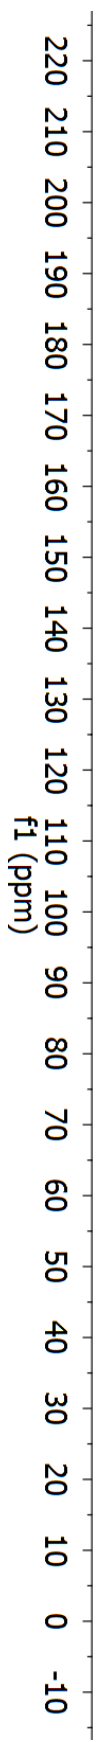

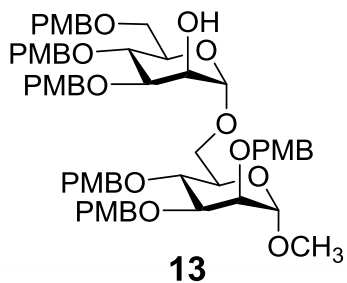

$^1\text{H}$ - $^{13}\text{C}$  HMQC  
600/150 MHz  
 $\text{CDCl}_3$

|   |         |        |      |
|---|---------|--------|------|
| 1 | 11645.7 | 77.220 | 34.3 |
| 2 | 11613.7 | 77.008 | 35.0 |
| 3 | 11581.7 | 76.796 | 34.7 |
| 4 | 8326.9  | 55.214 | 13.0 |

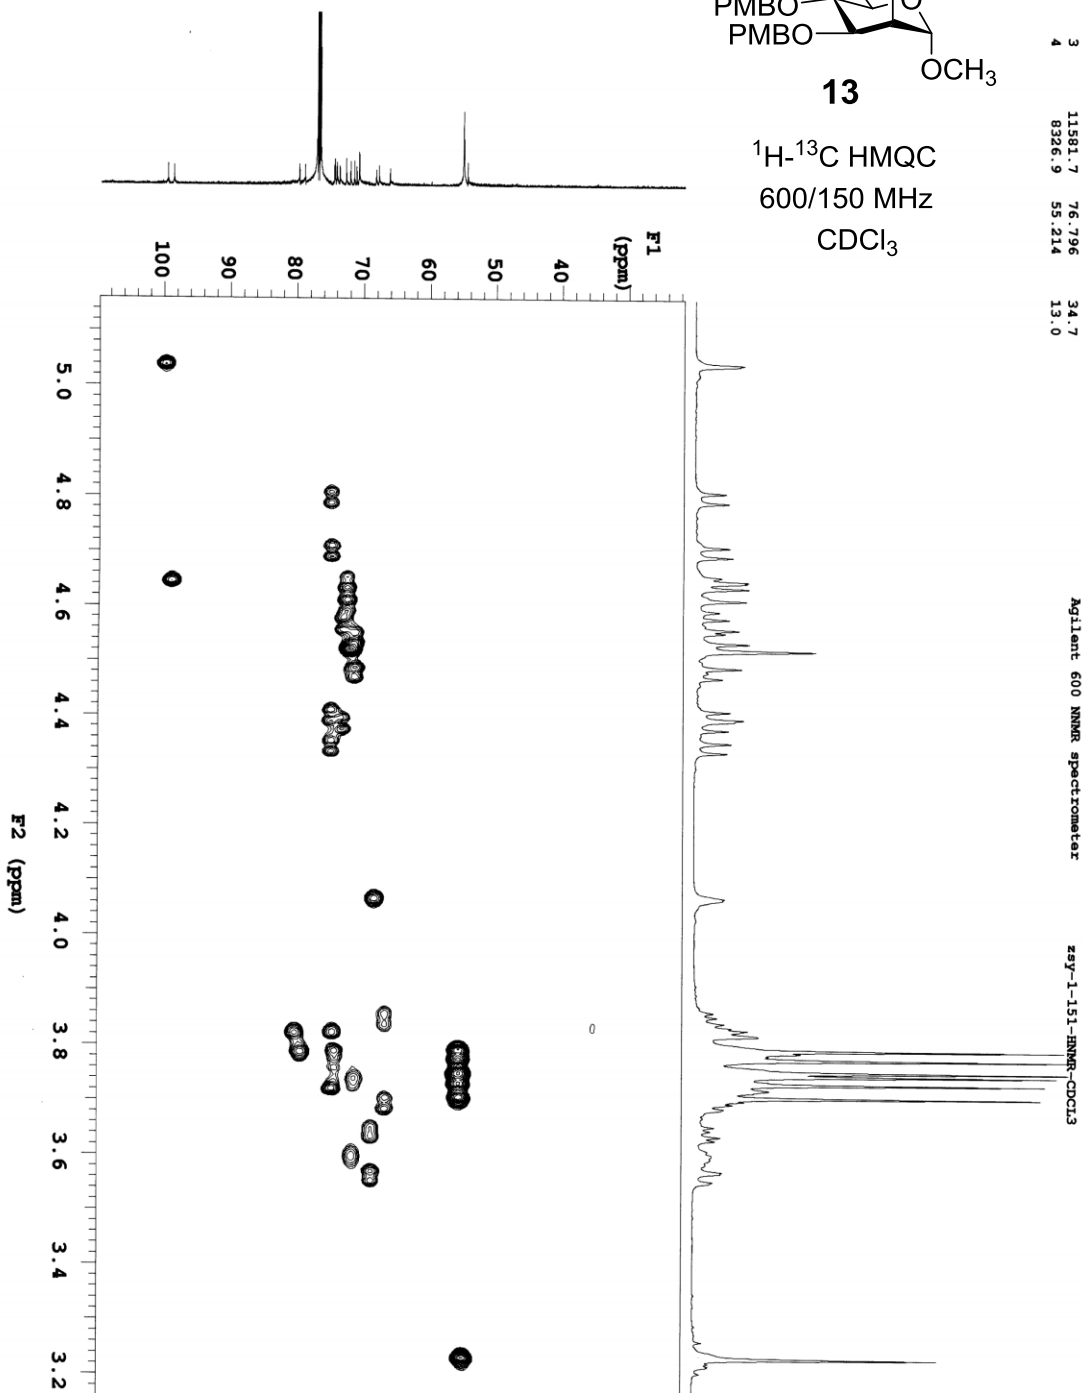

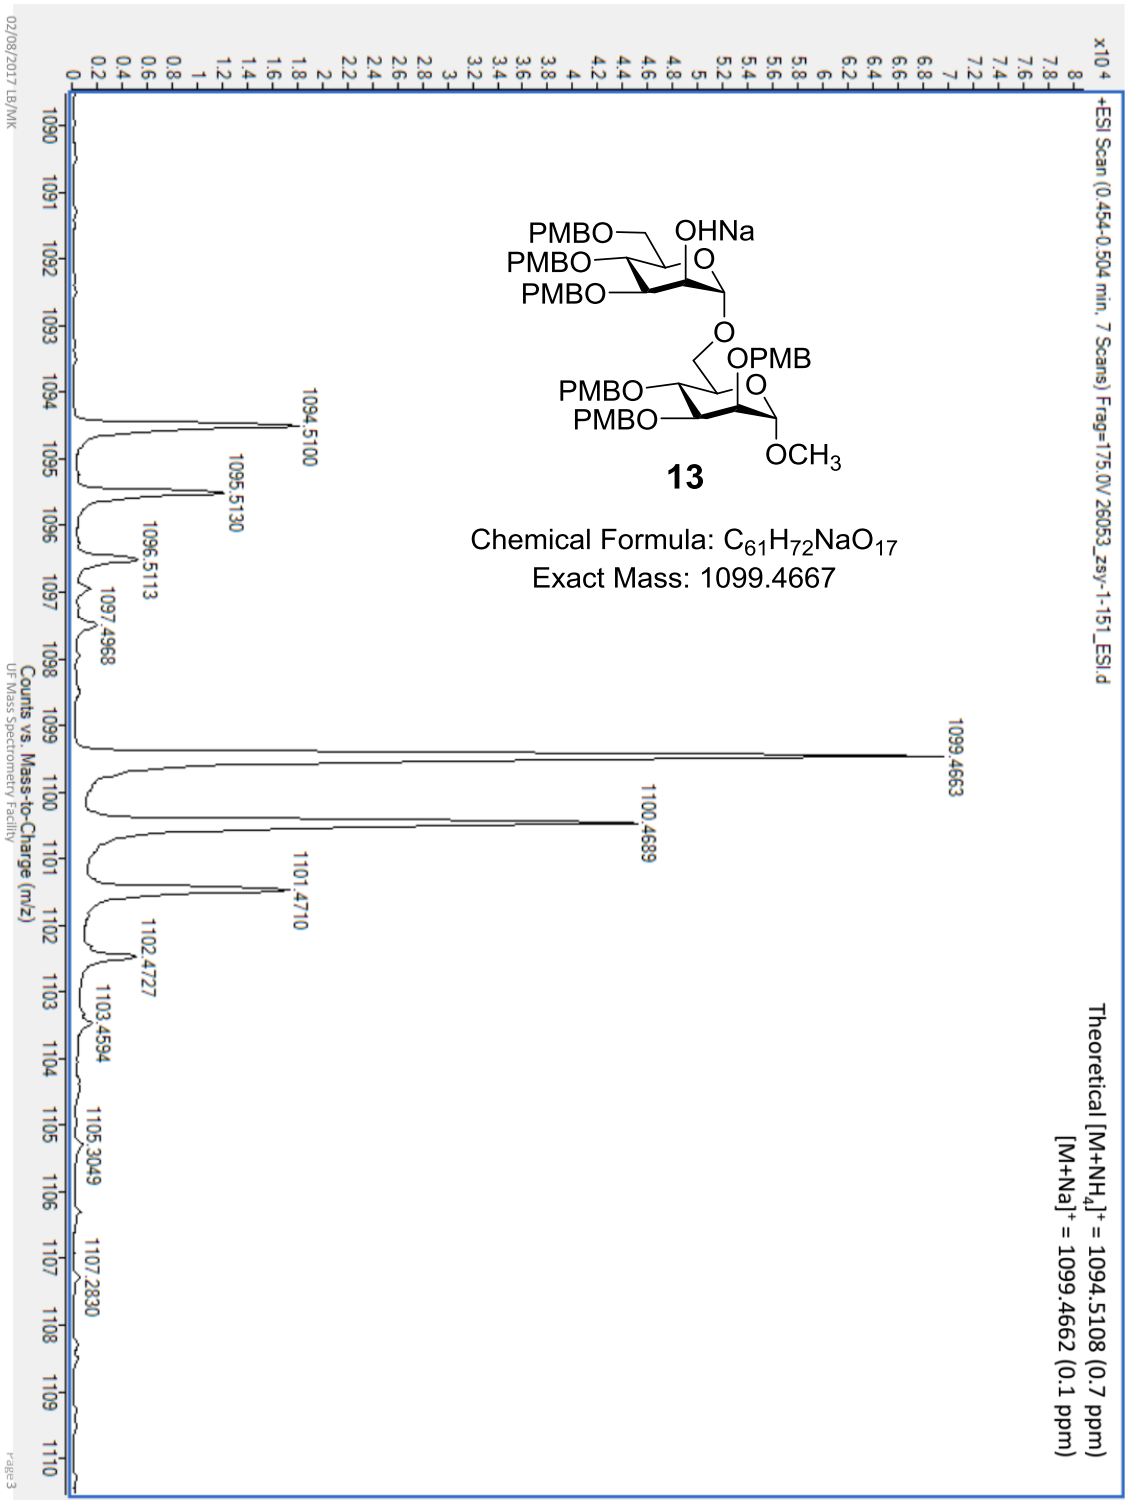

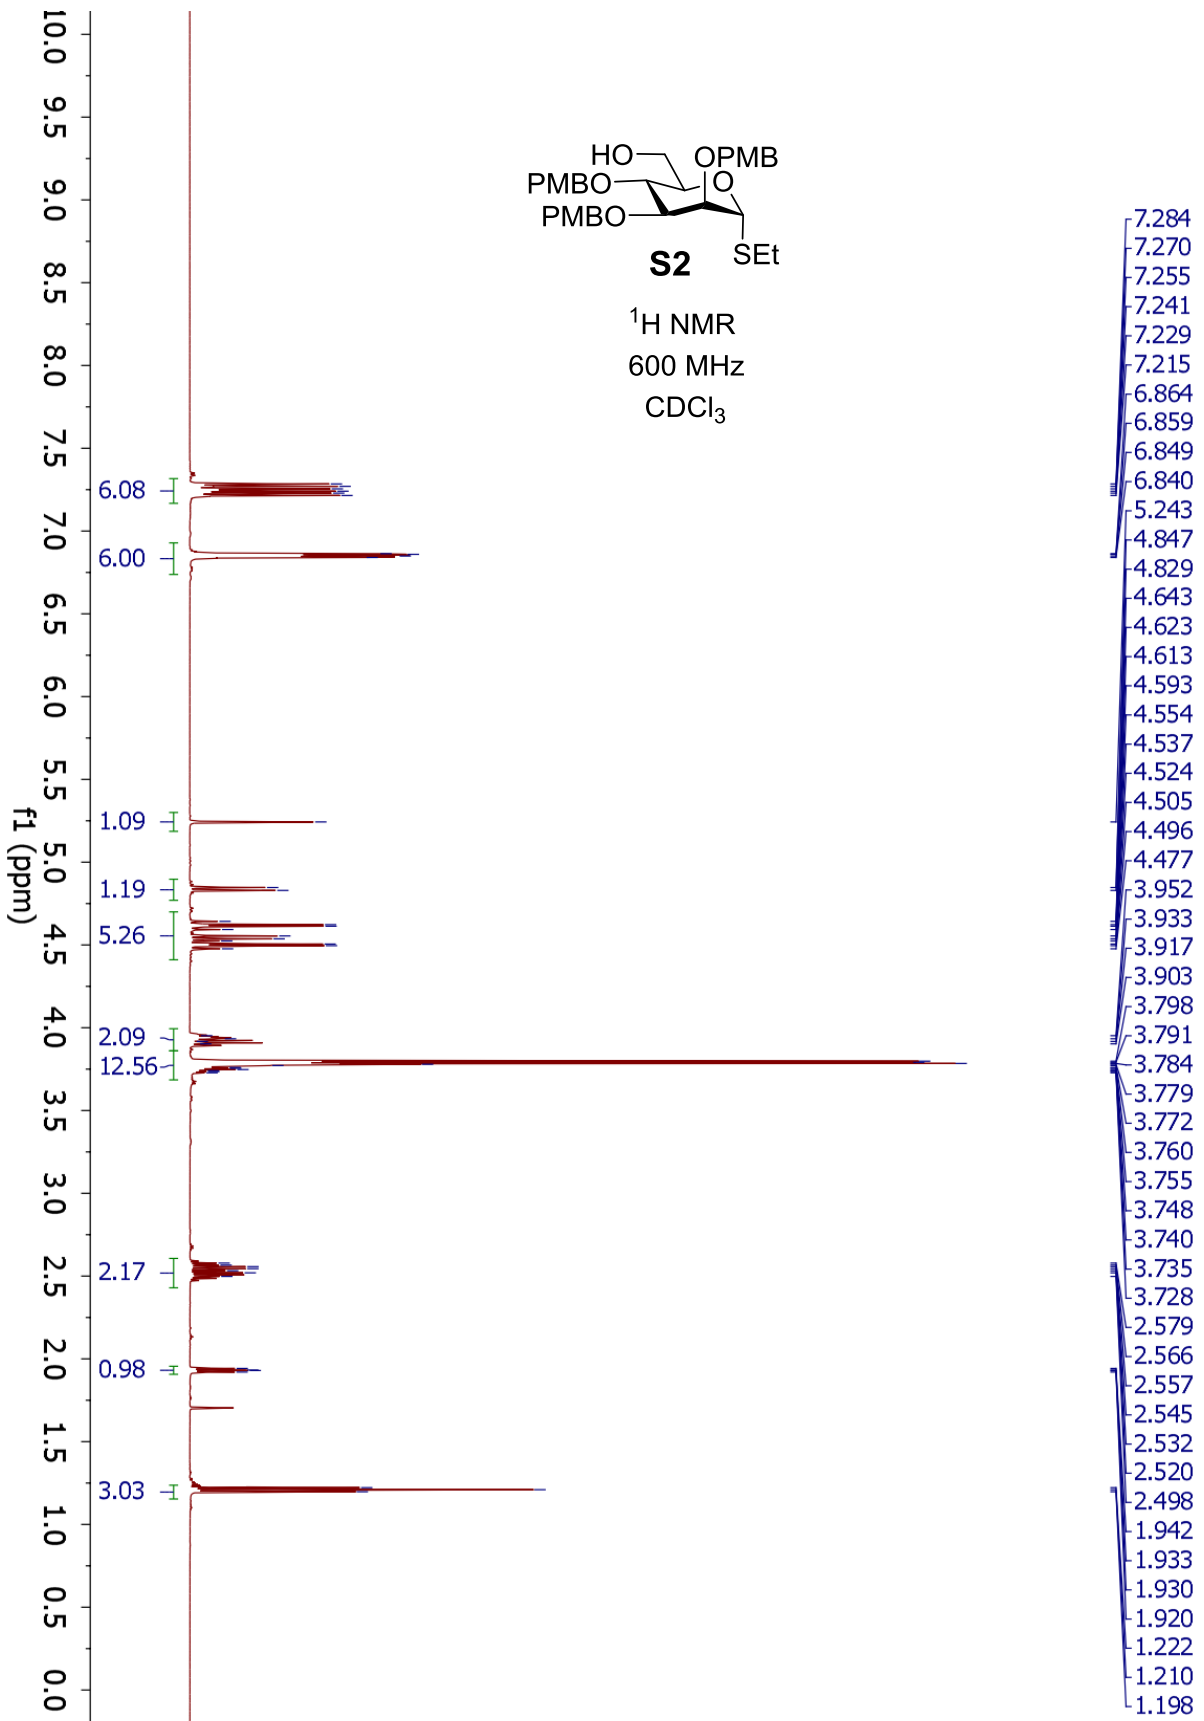

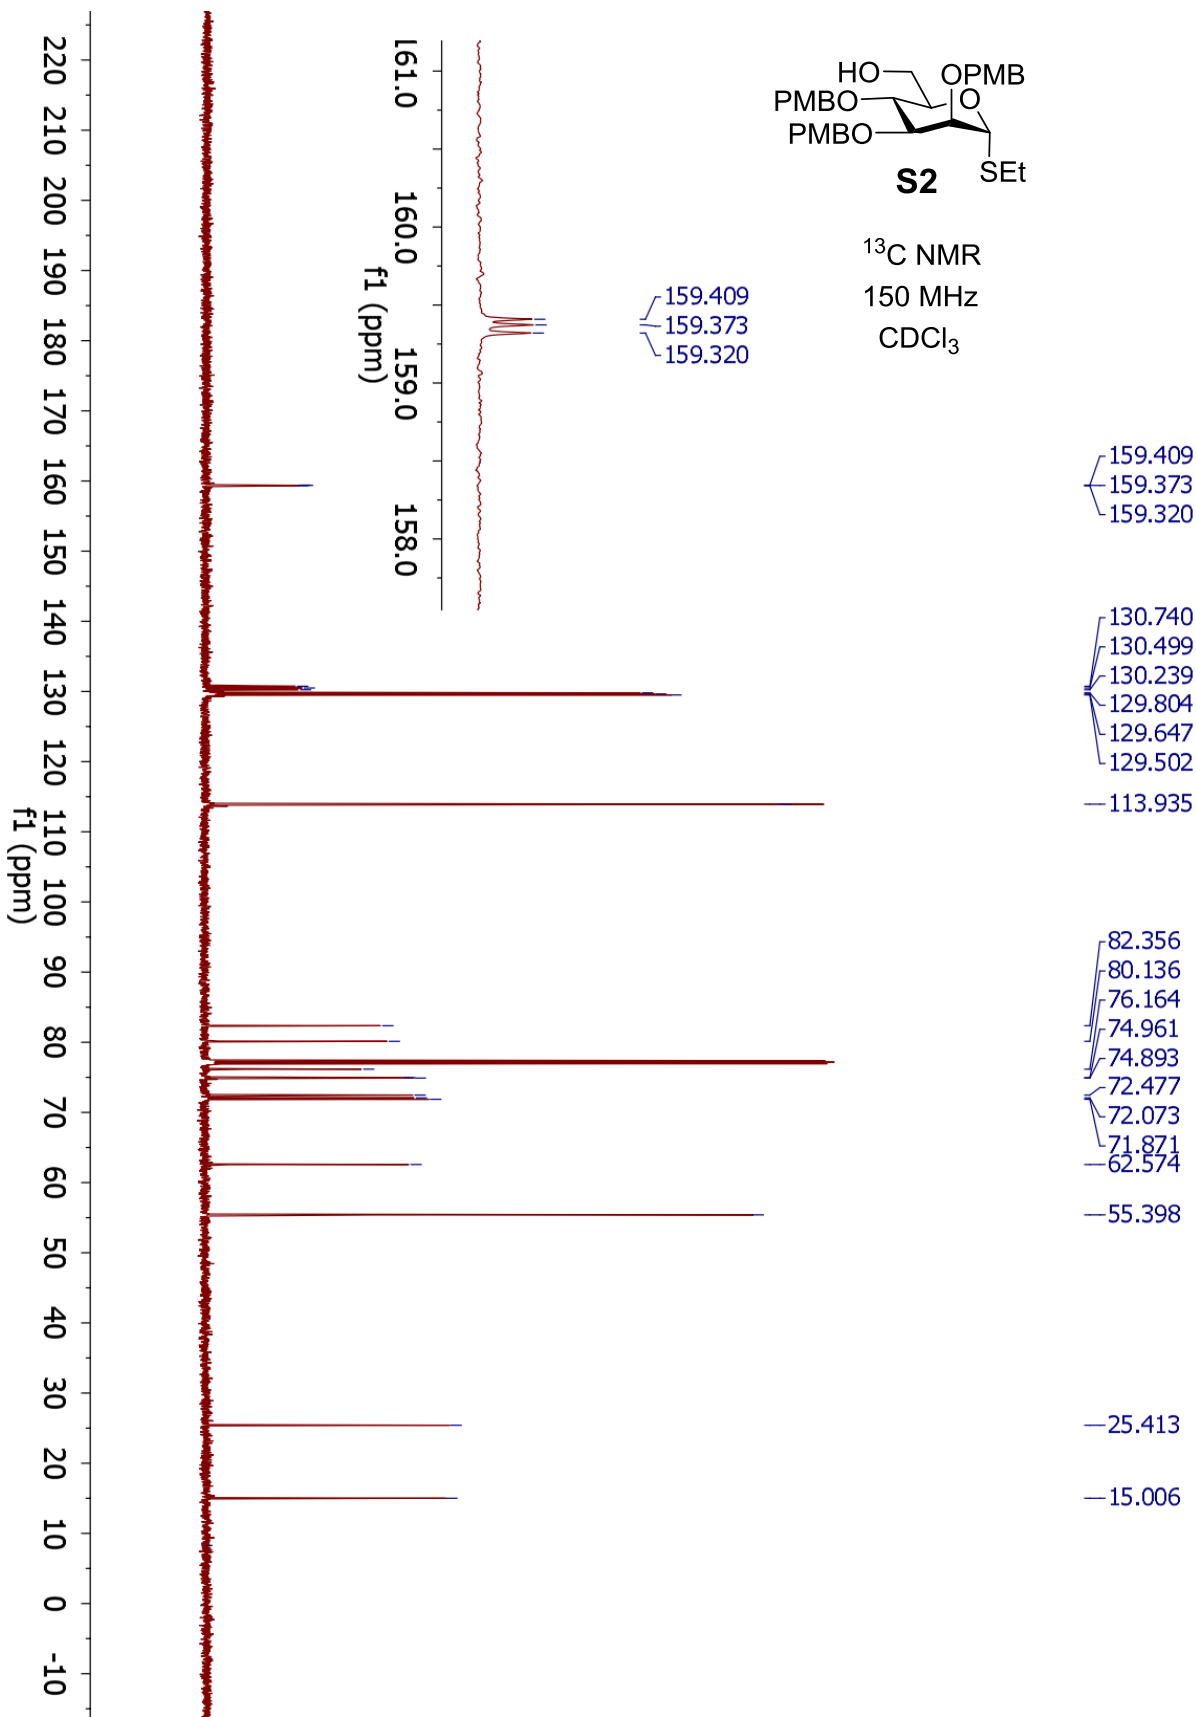

Sample Name :

Data Collected on:

a600-vnmr5600

Archive directory:

/home/vnmr1/vnmr5600/probes/probe\_calibs

Sample directory:

Fidfile: gcosy

Pulse Sequence: gcosy

Solvent: cdcl3

Data collected on: Nov 30 2015

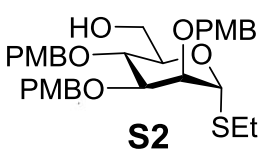

$^1\text{H}-^1\text{H}$  COSY  
600 MHz  
 $\text{CDCl}_3$

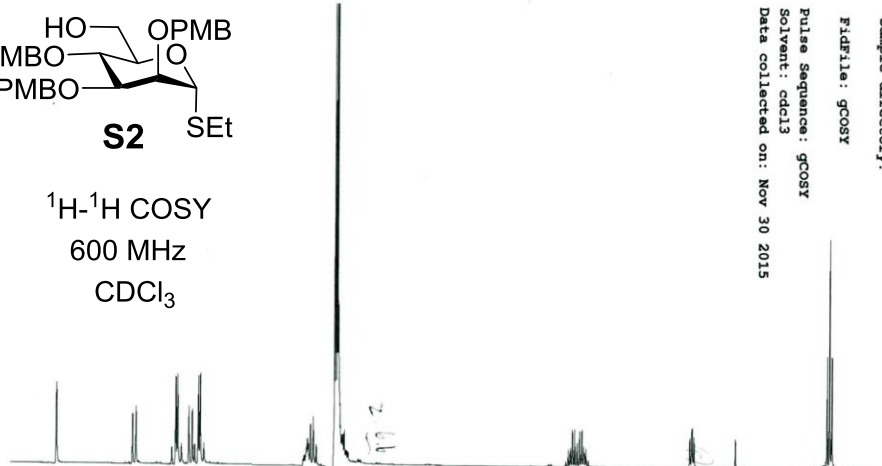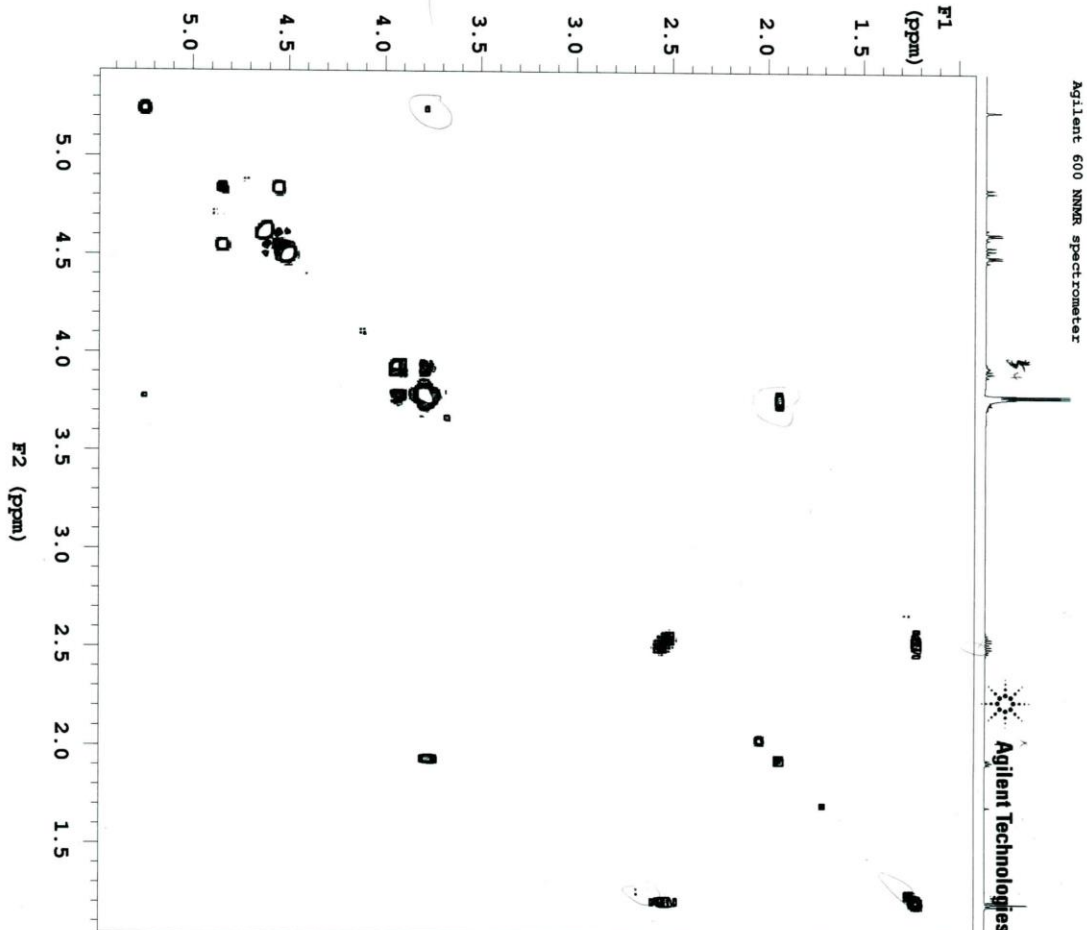

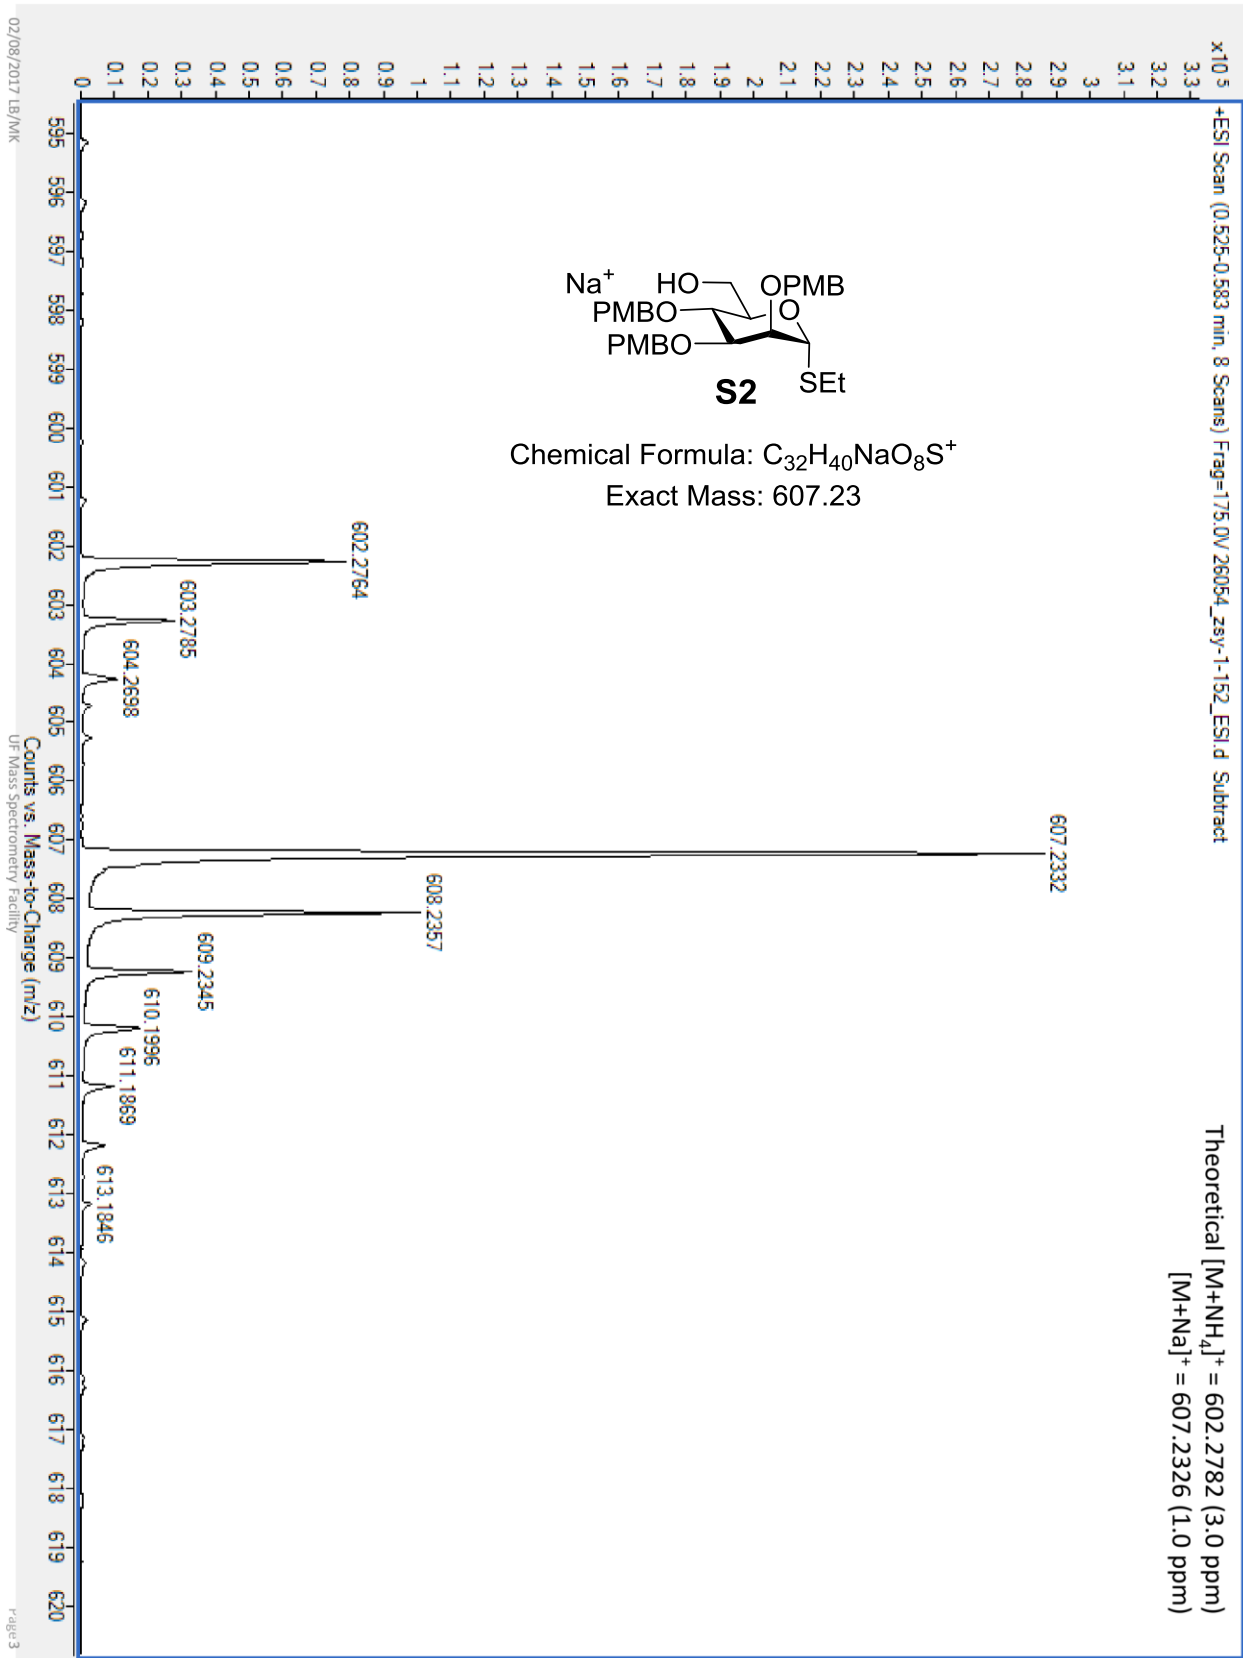

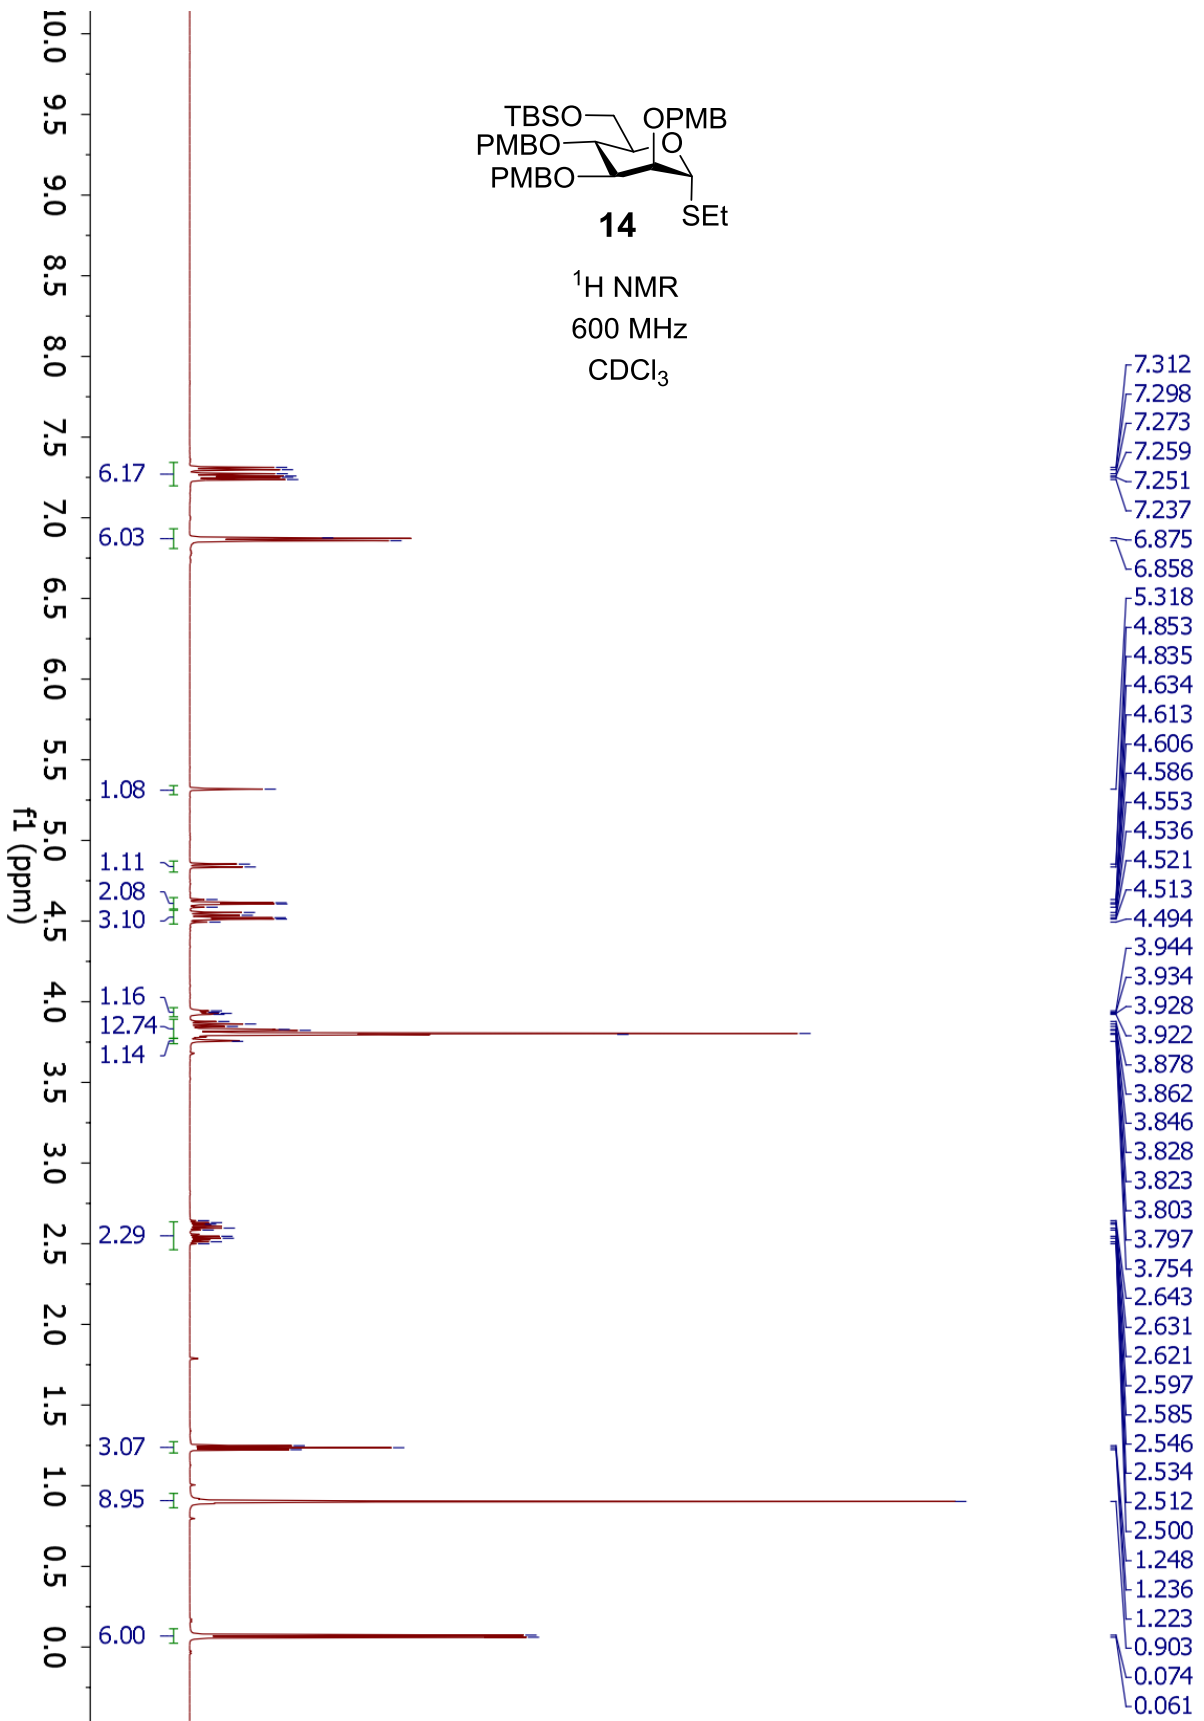



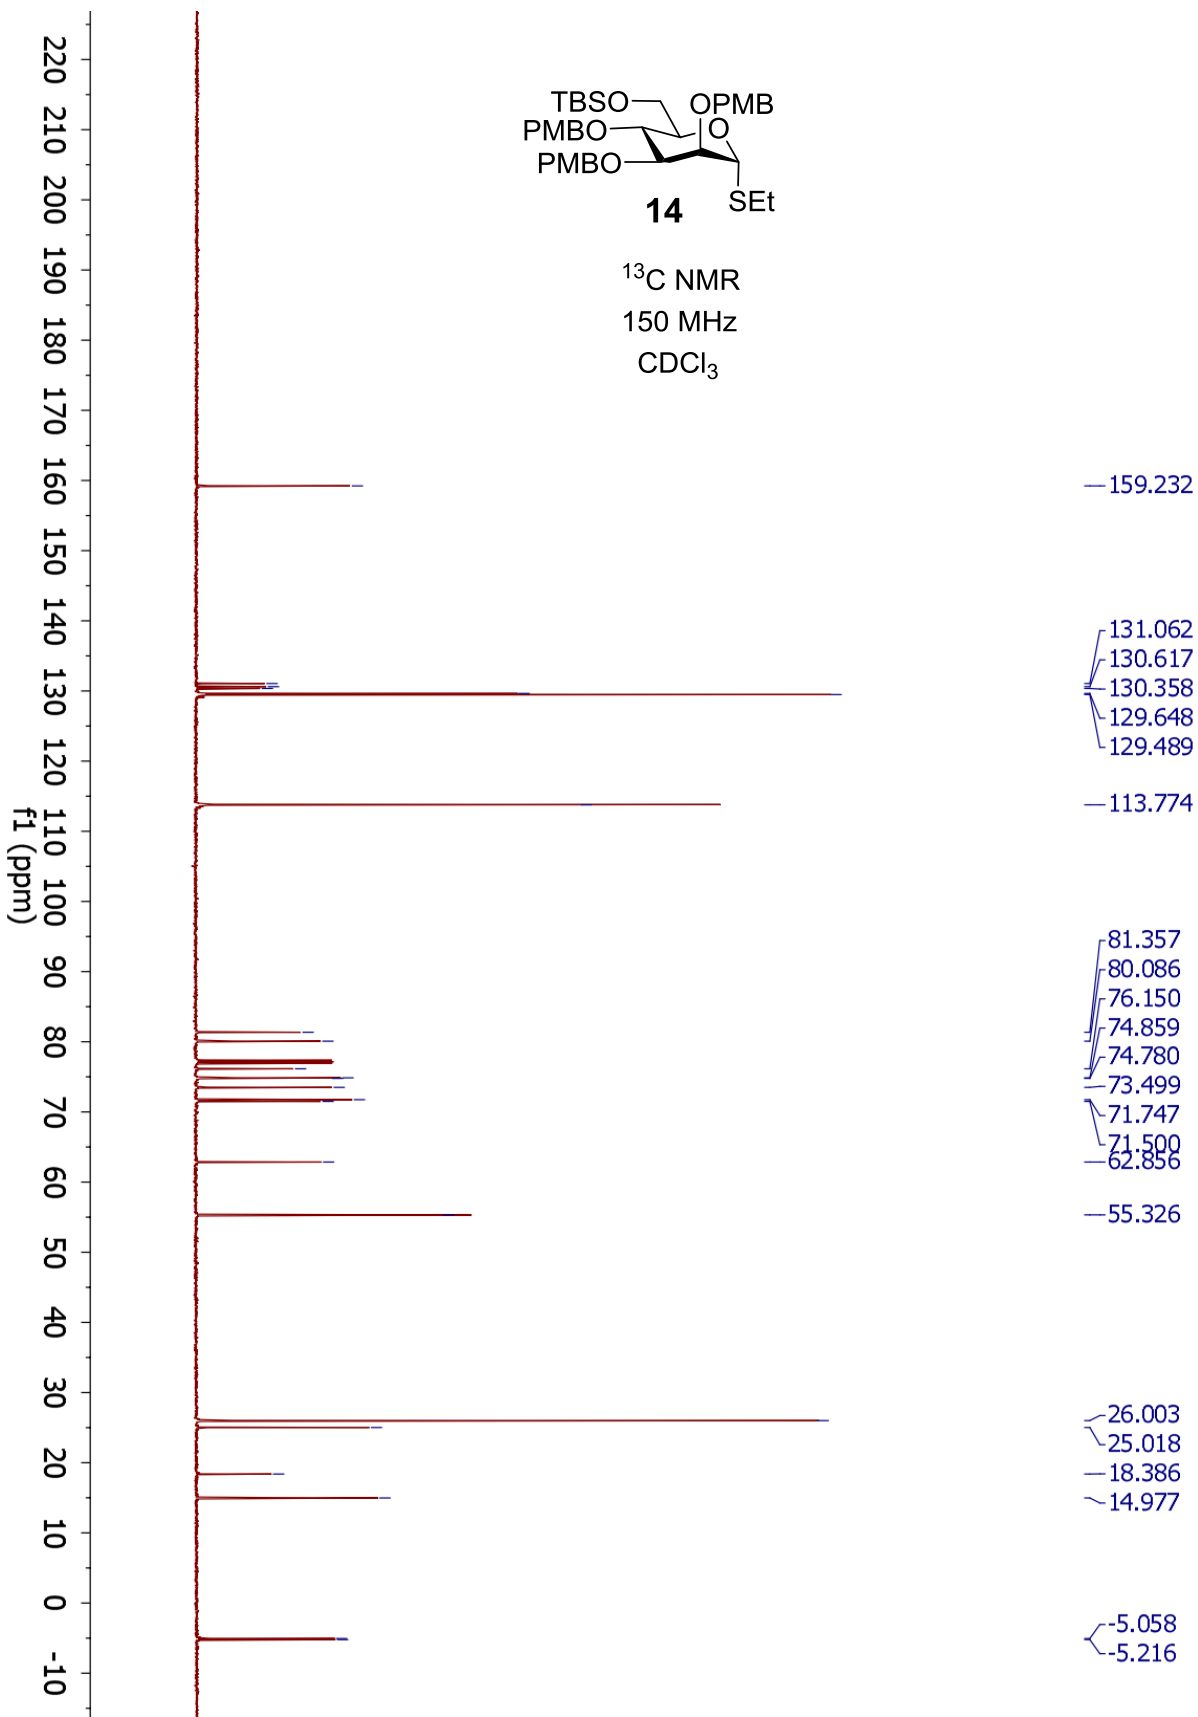

Sample Name:

Data Collected on:

a600-nmr600

Archive directory:

/home/vmari/vmrzsys/probes/probe\_calibs

Sample directory:

Fidfile: gCOSY

Pulse Sequence: gCOSY

Solvent: cdcl3

Data collected on: Dec 2 2015

Agilent 600 NMR spectrometer

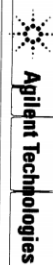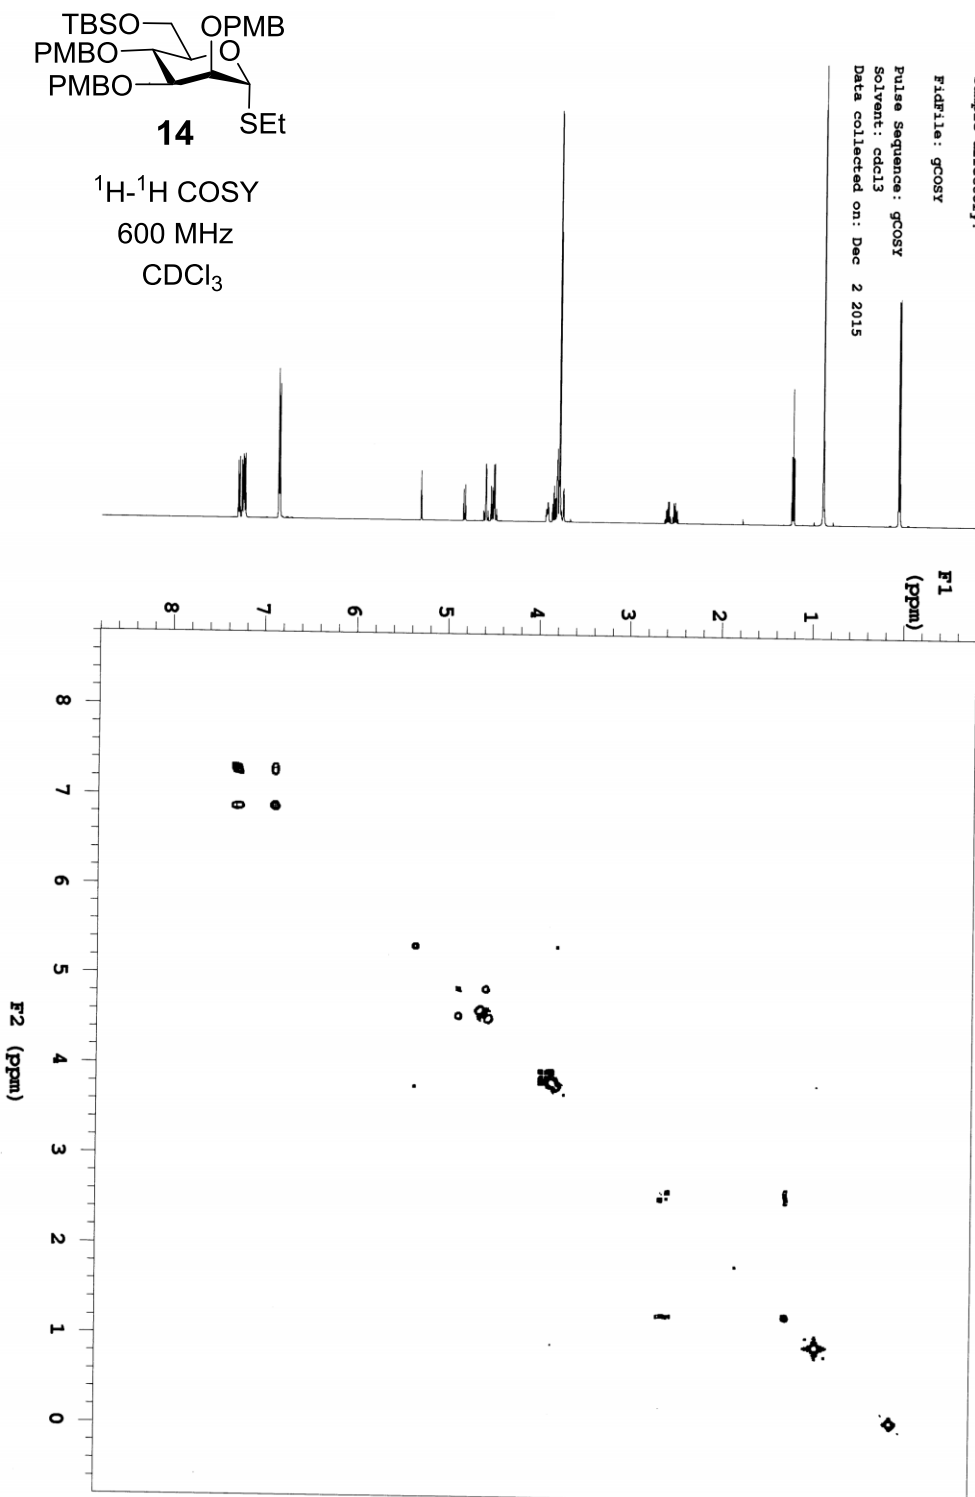

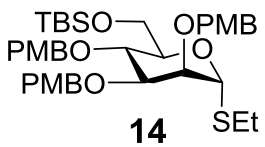

<sup>1</sup>H-<sup>13</sup>C HMQC  
 600/150 MHz  
 CDCl<sub>3</sub>

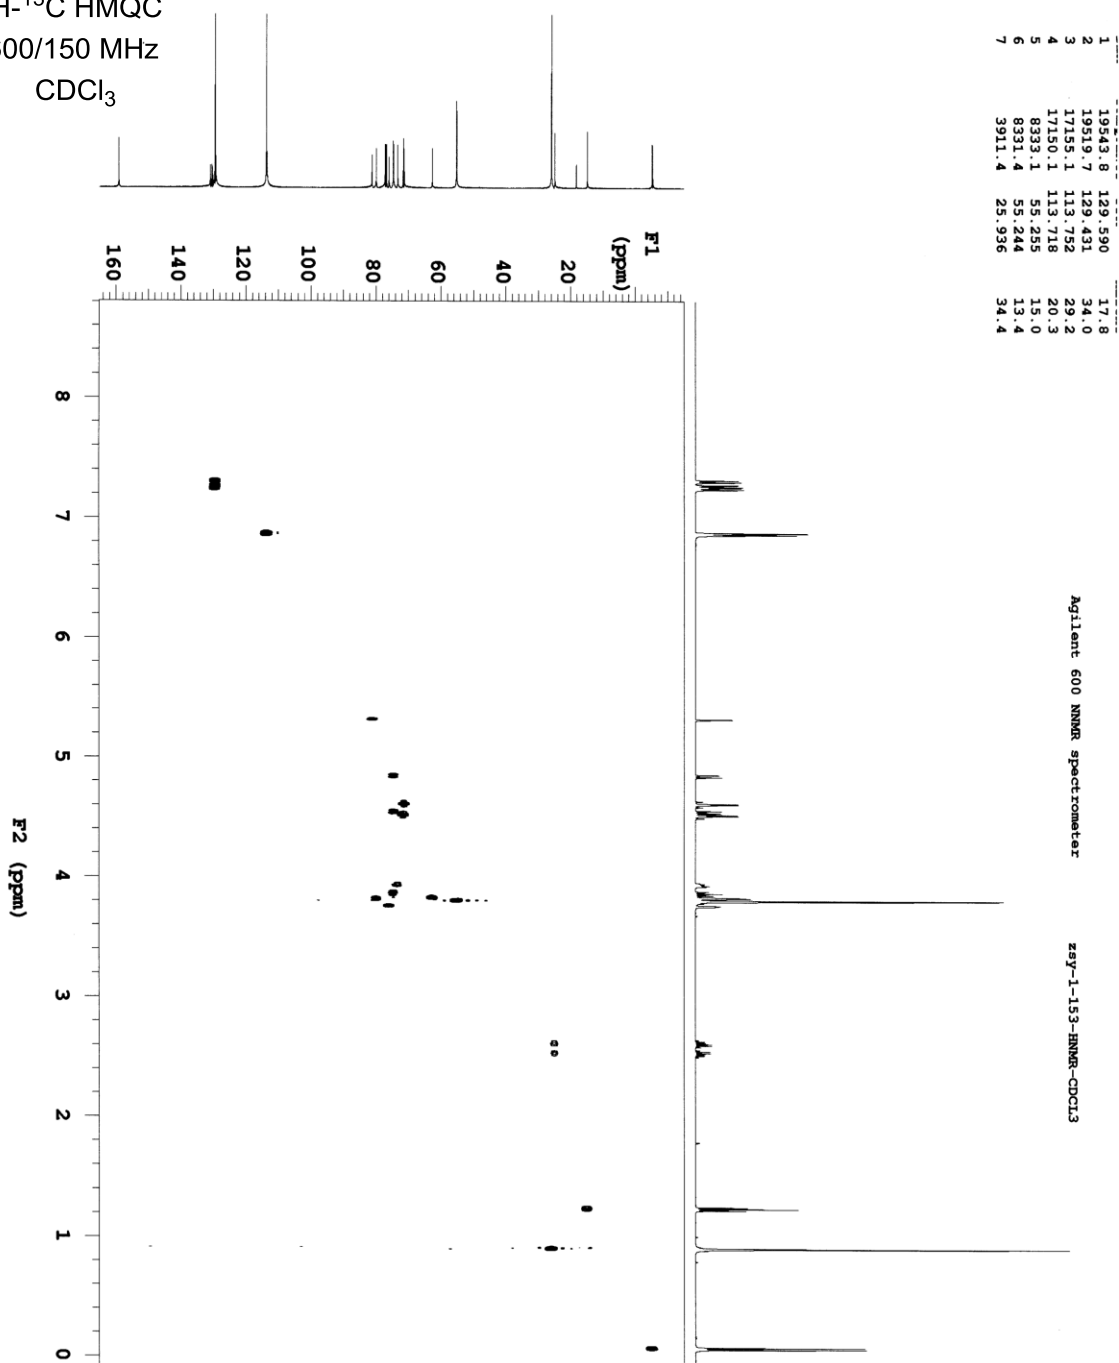

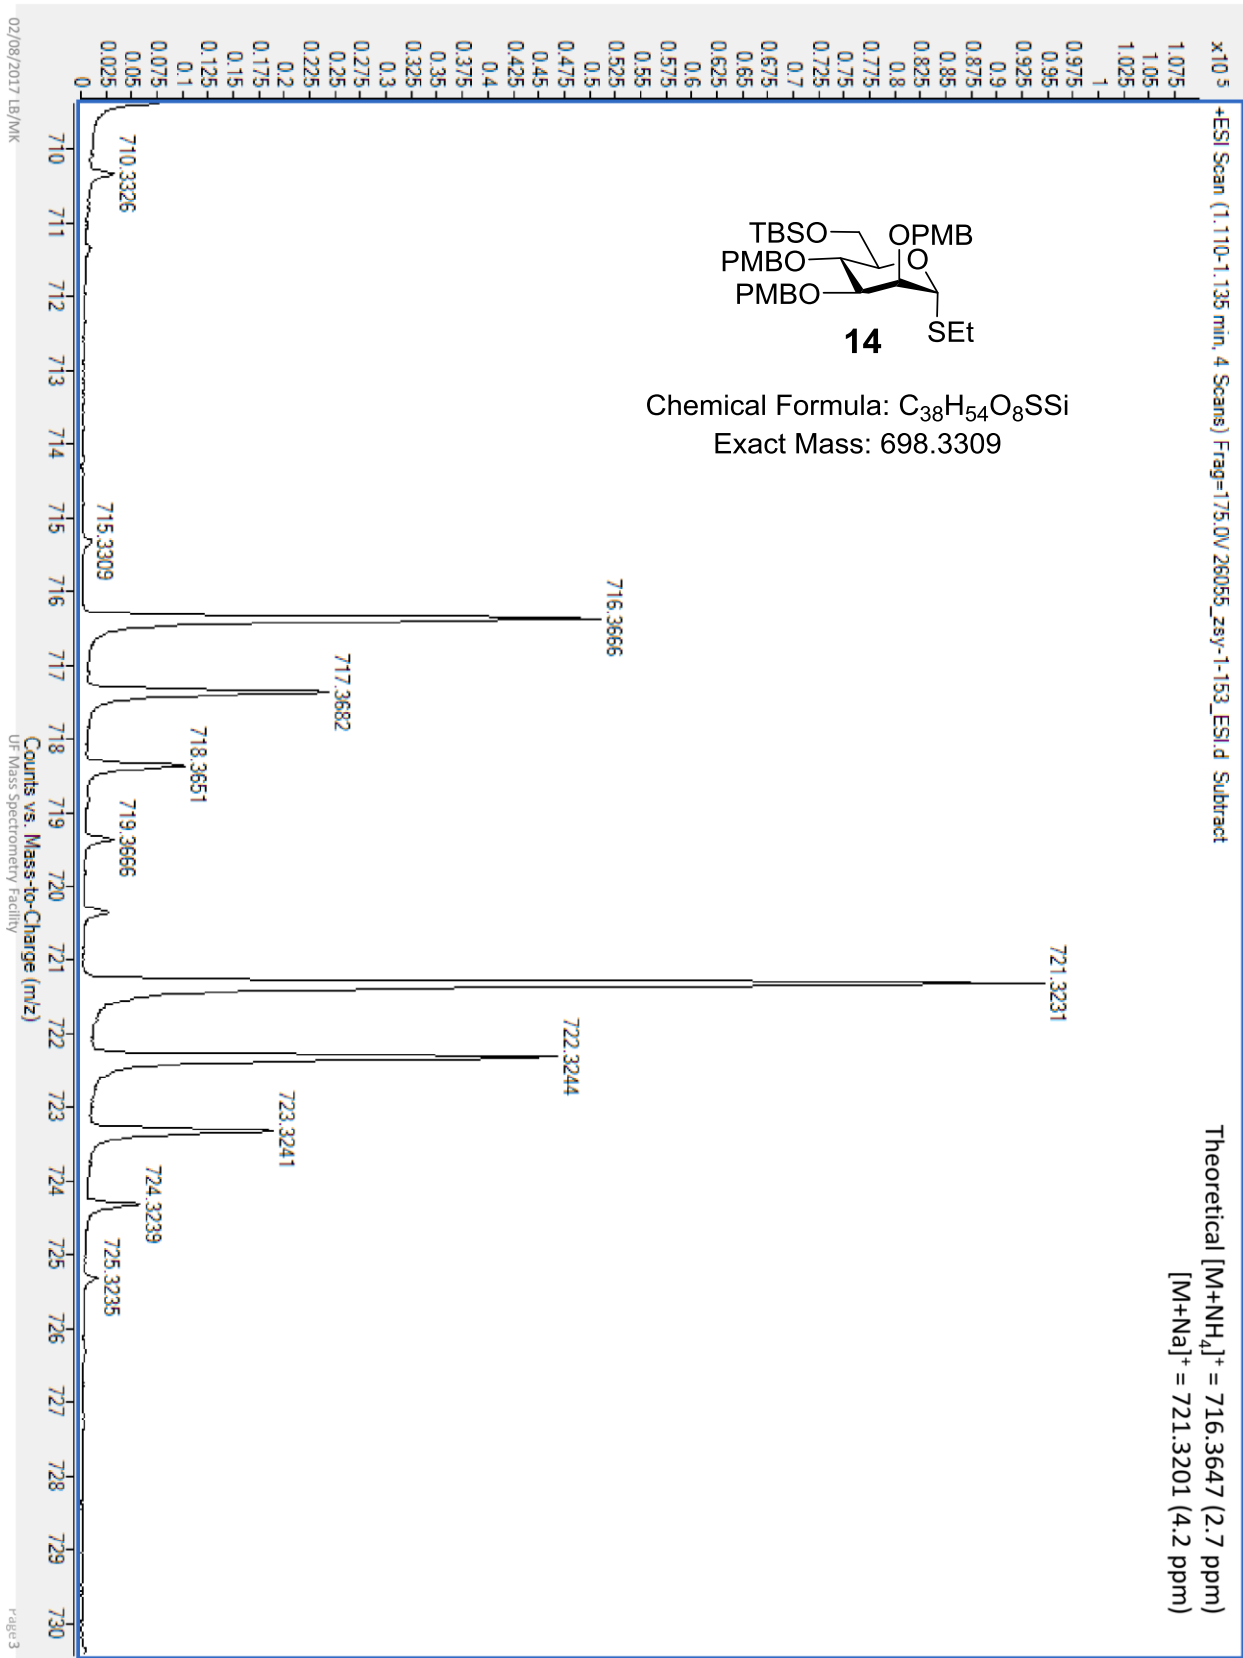

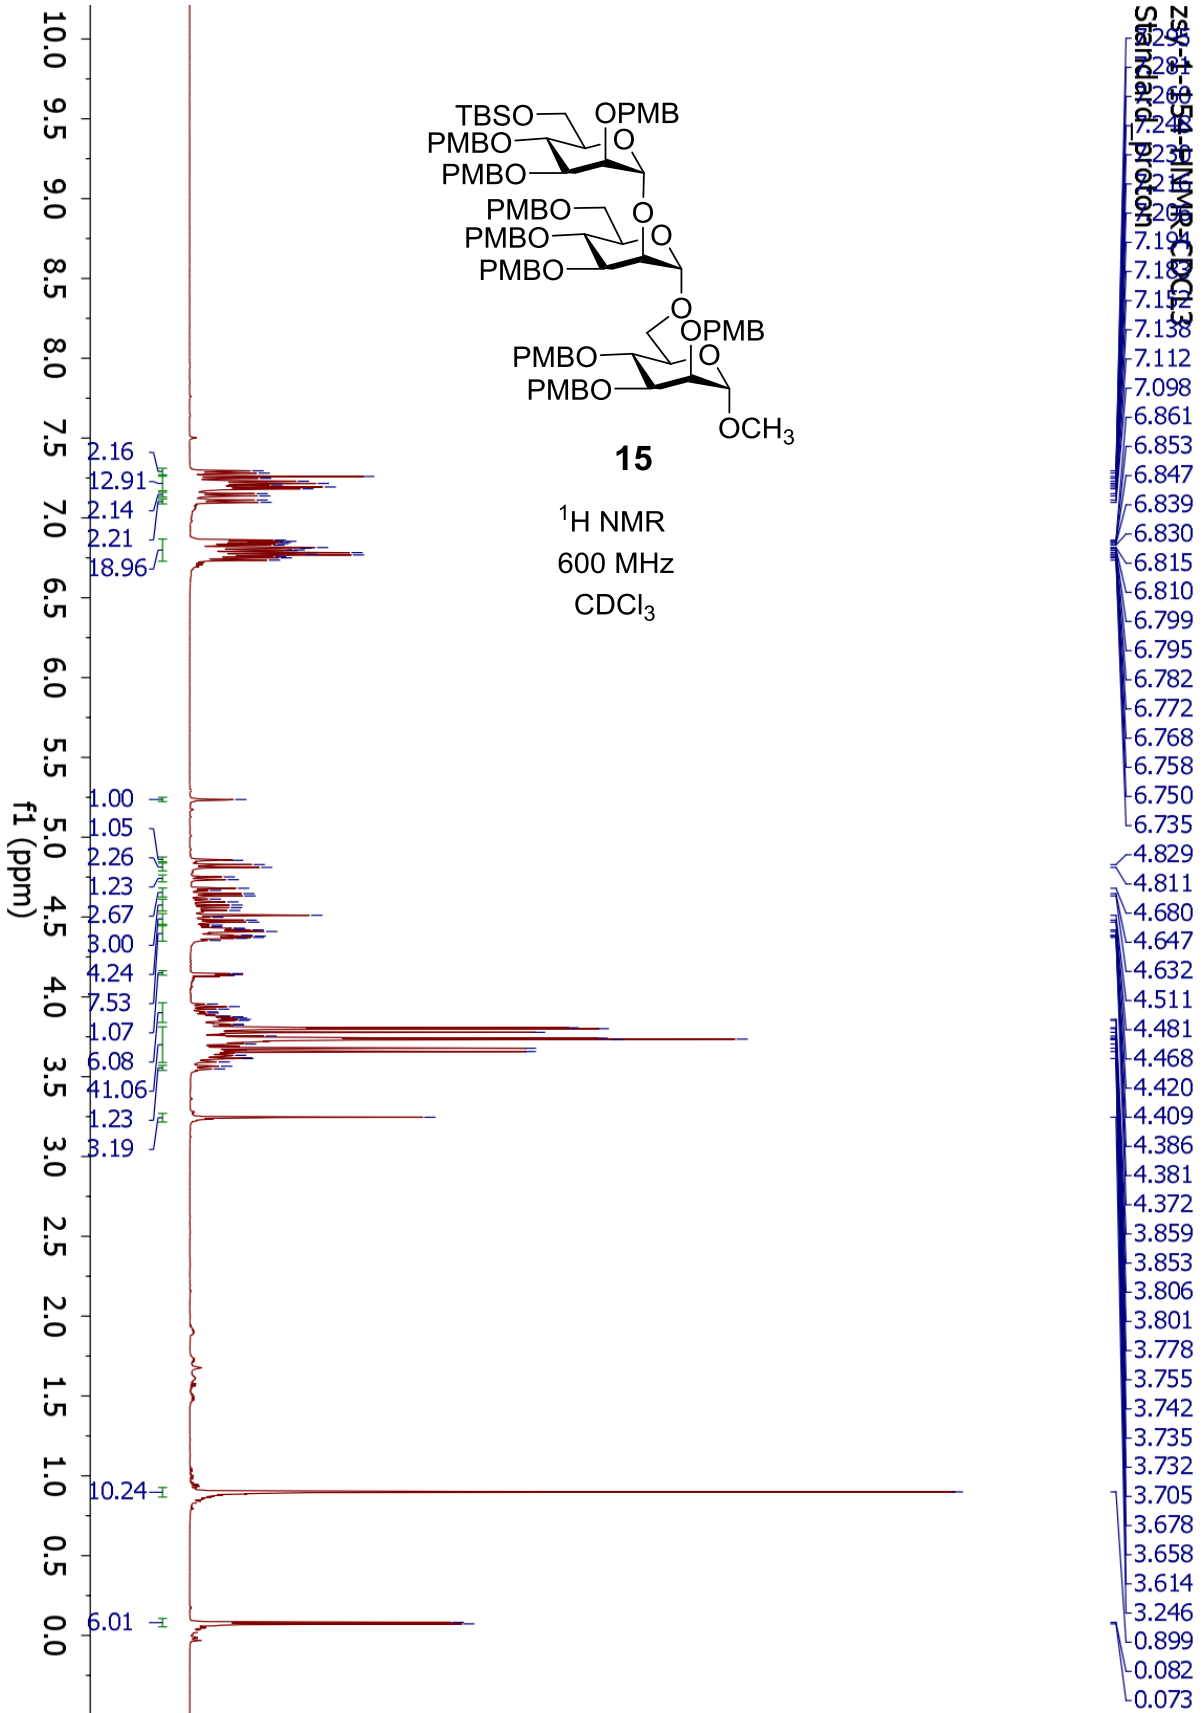



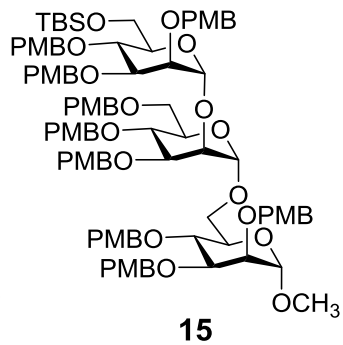

$^1\text{H}$ - $^{13}\text{C}$  HMQC  
600/150 MHz  
 $\text{CDCl}_3$

|   |         |        |      |
|---|---------|--------|------|
| 1 | 11647.4 | 77.231 | 34.7 |
| 2 | 11615.4 | 77.019 | 34.9 |
| 3 | 11583.4 | 76.807 | 34.2 |

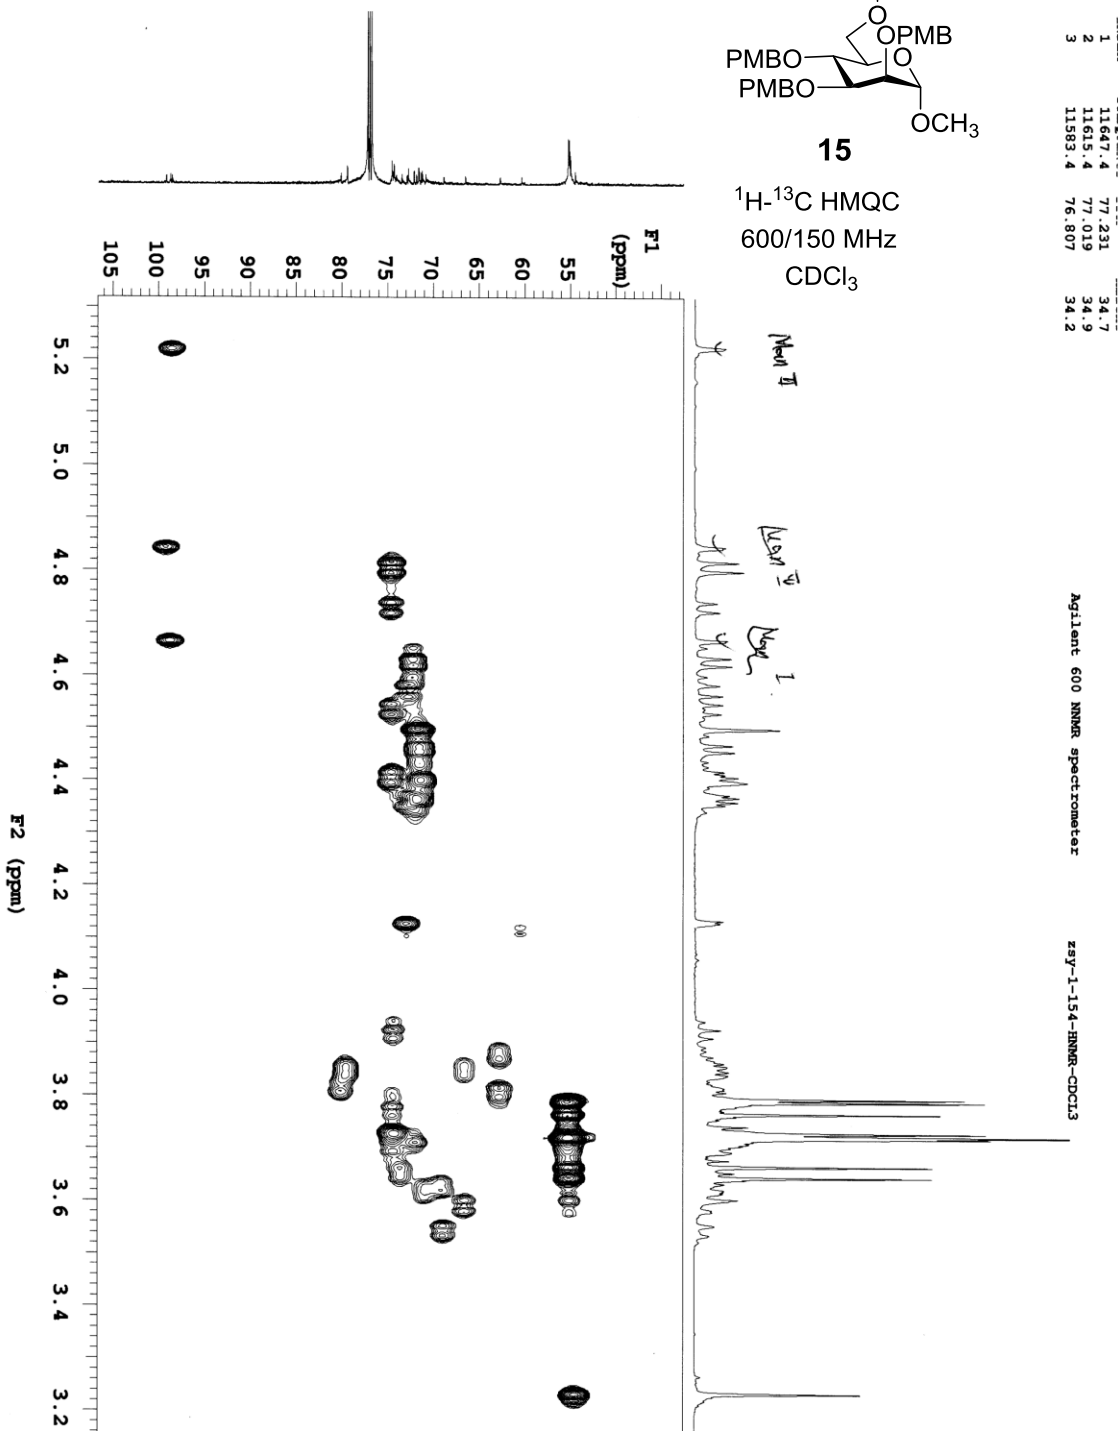

Agilent 600 NMR spectrometer

zsy-1-154-NMR-CDCl3

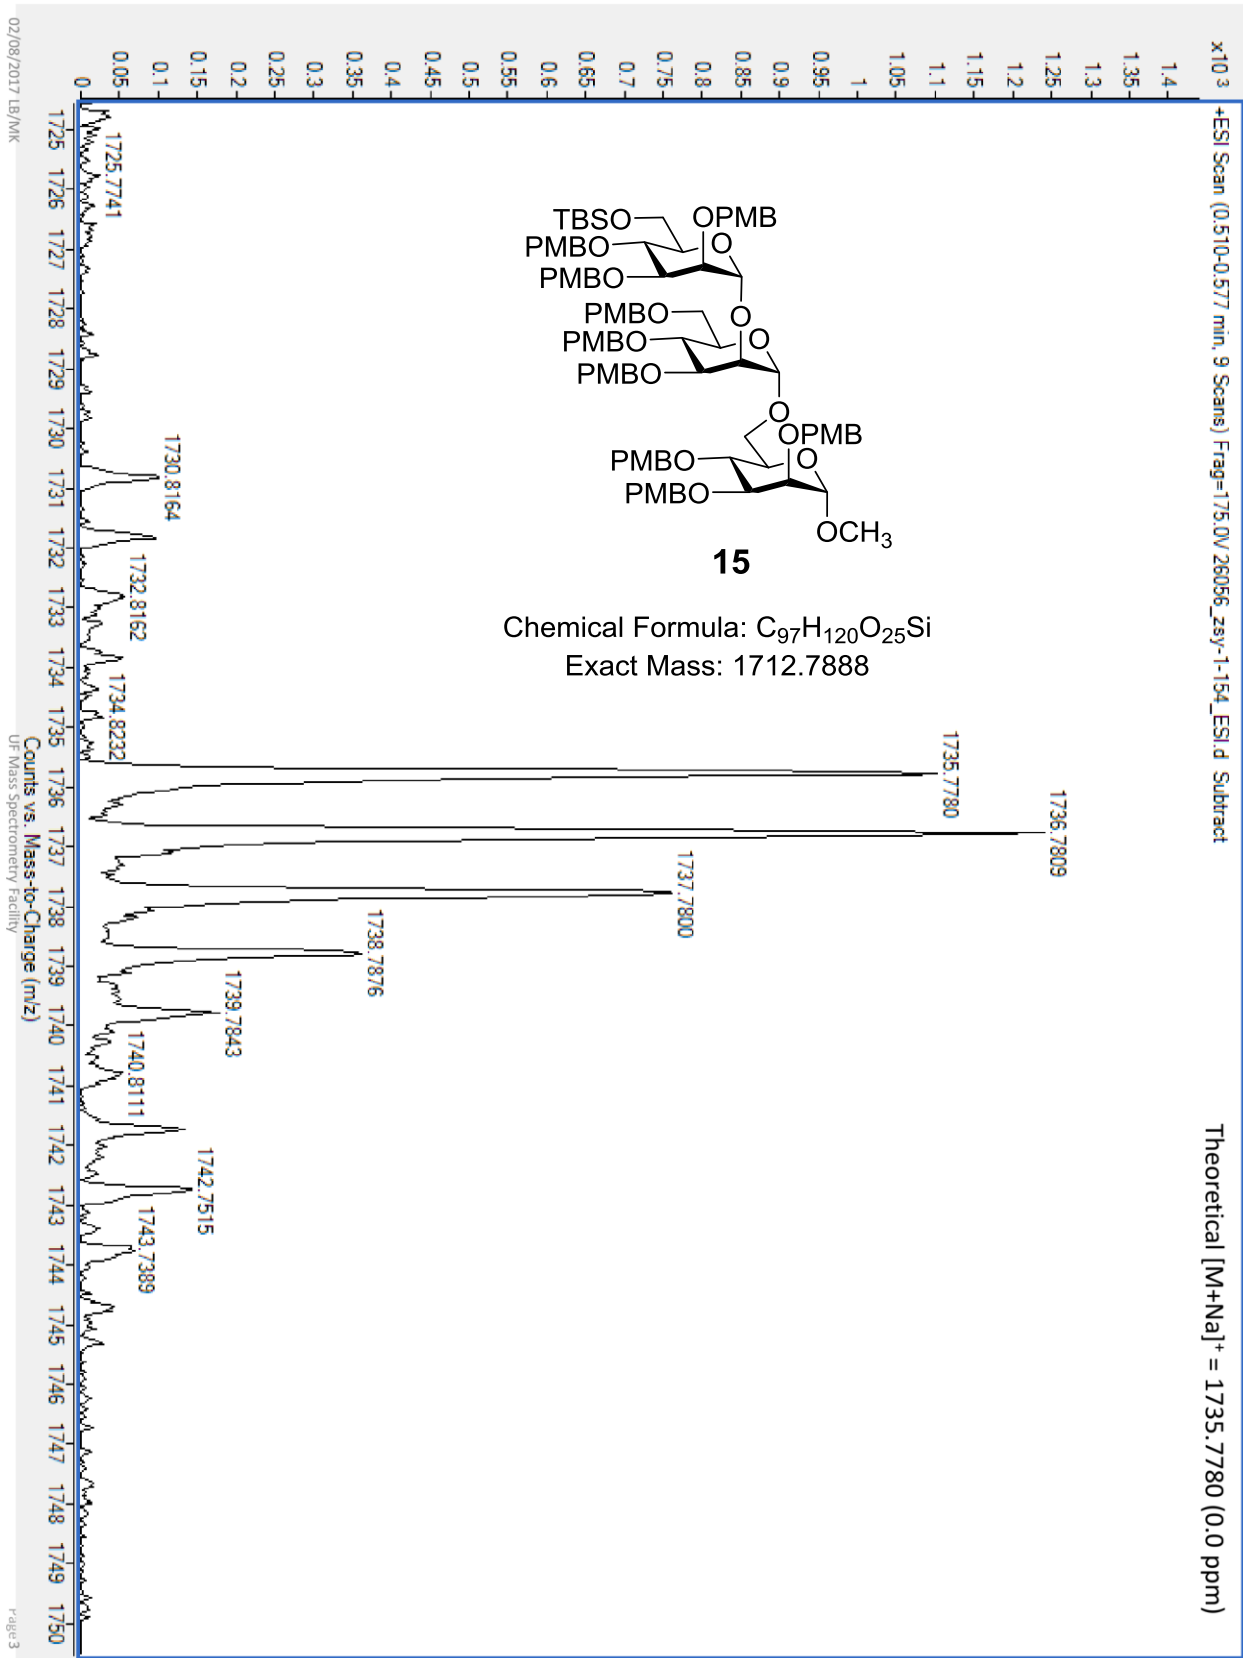



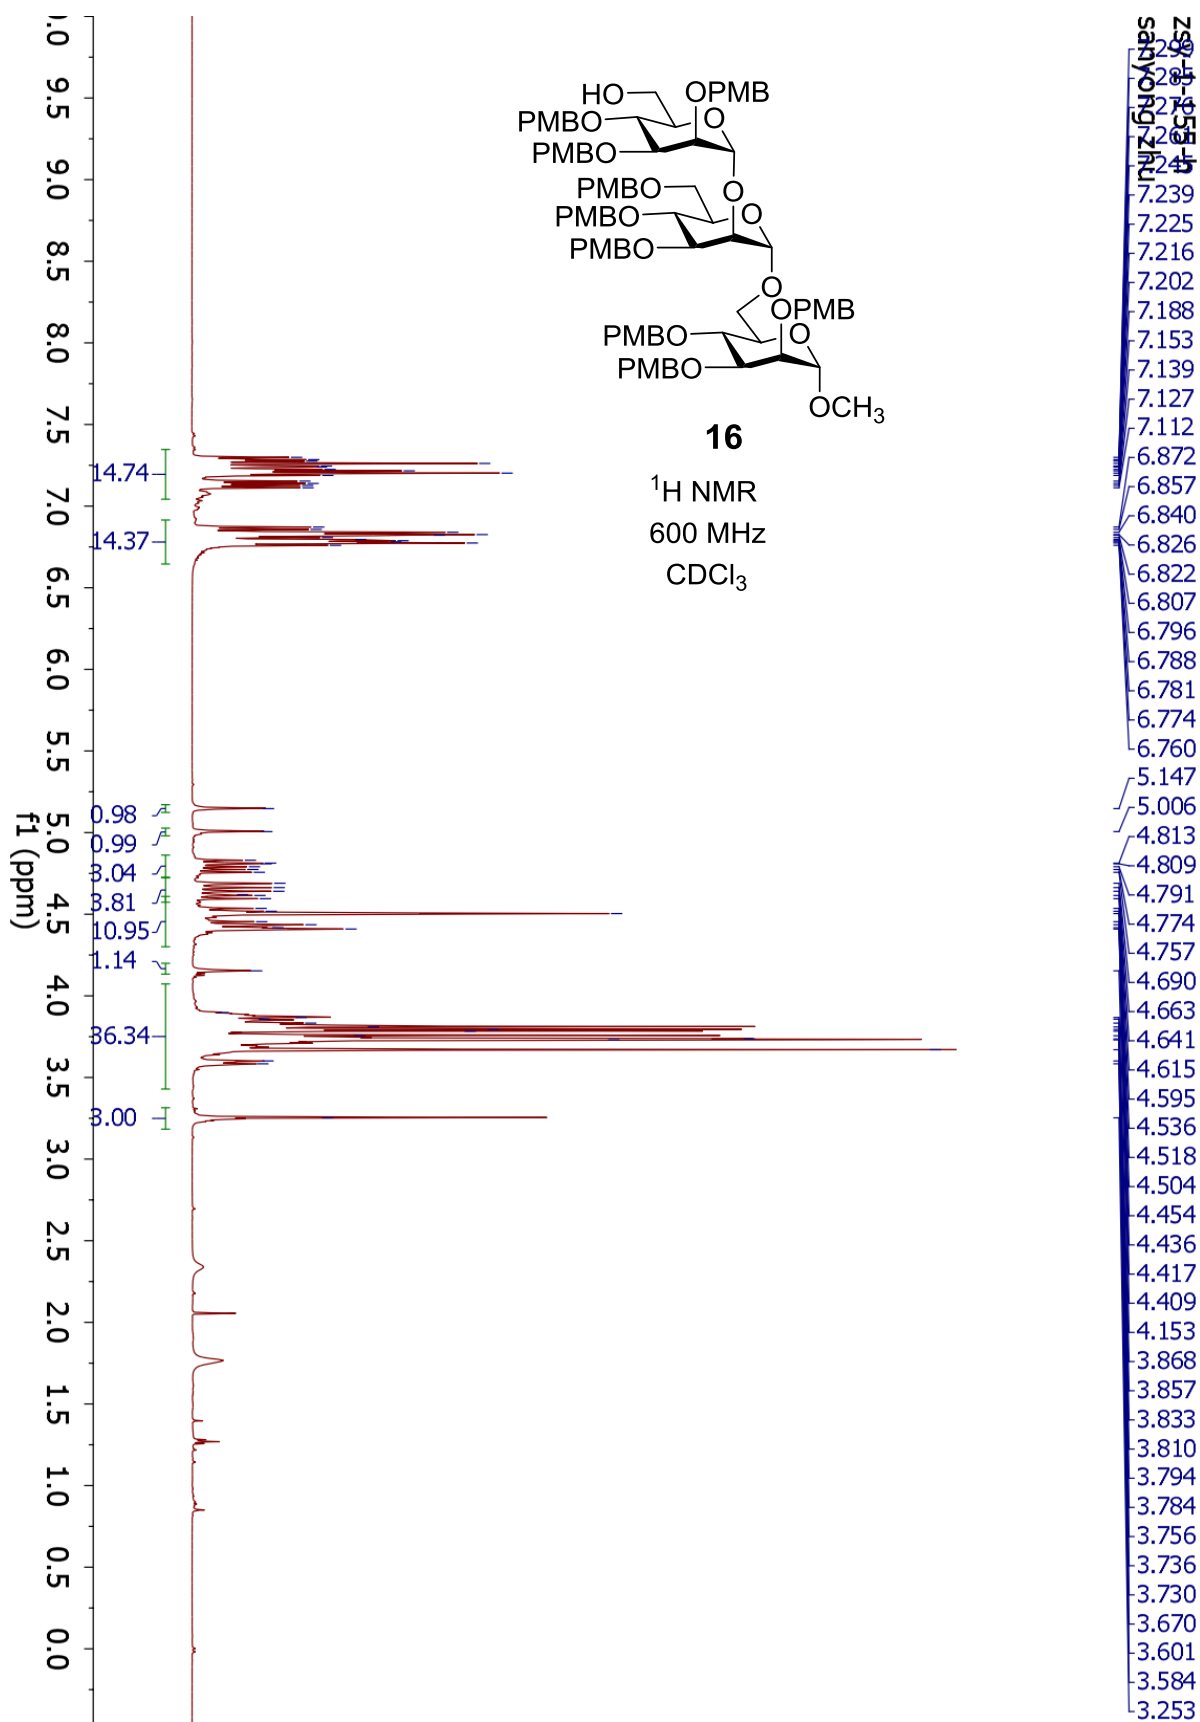

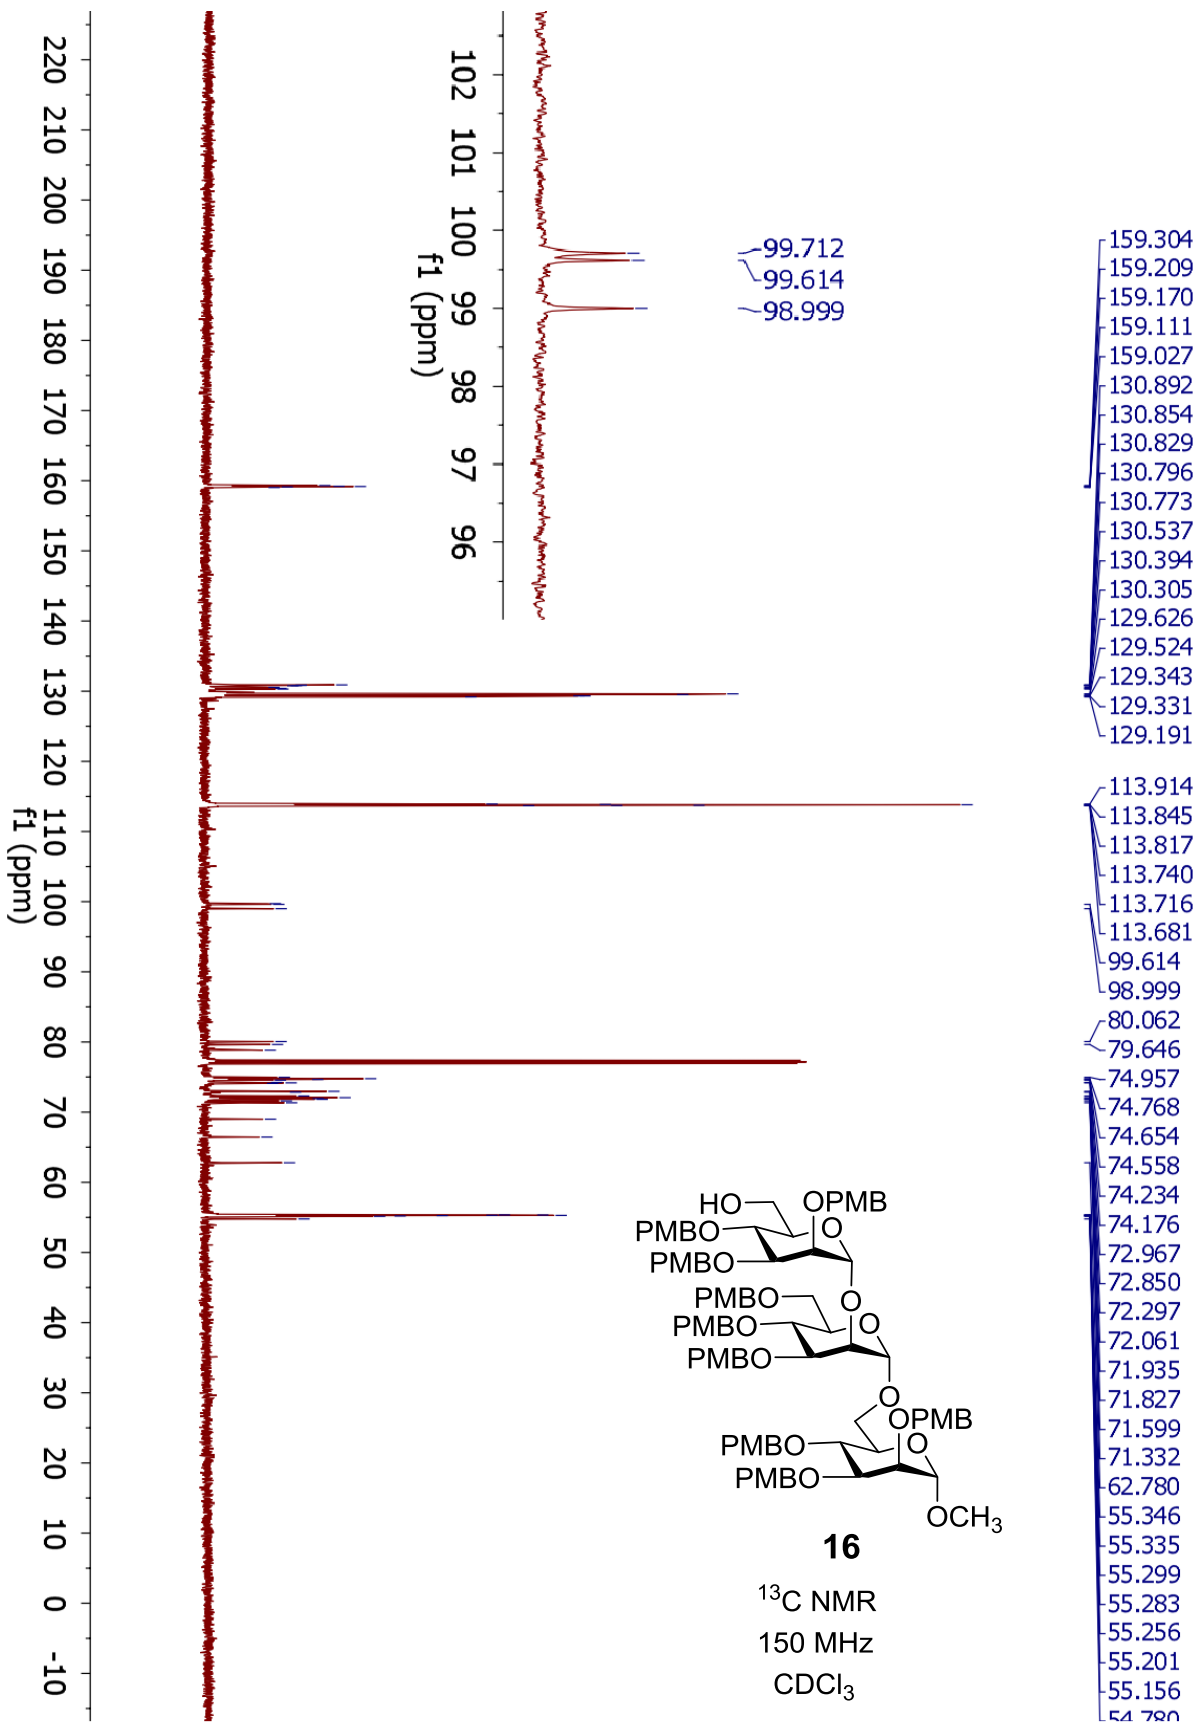

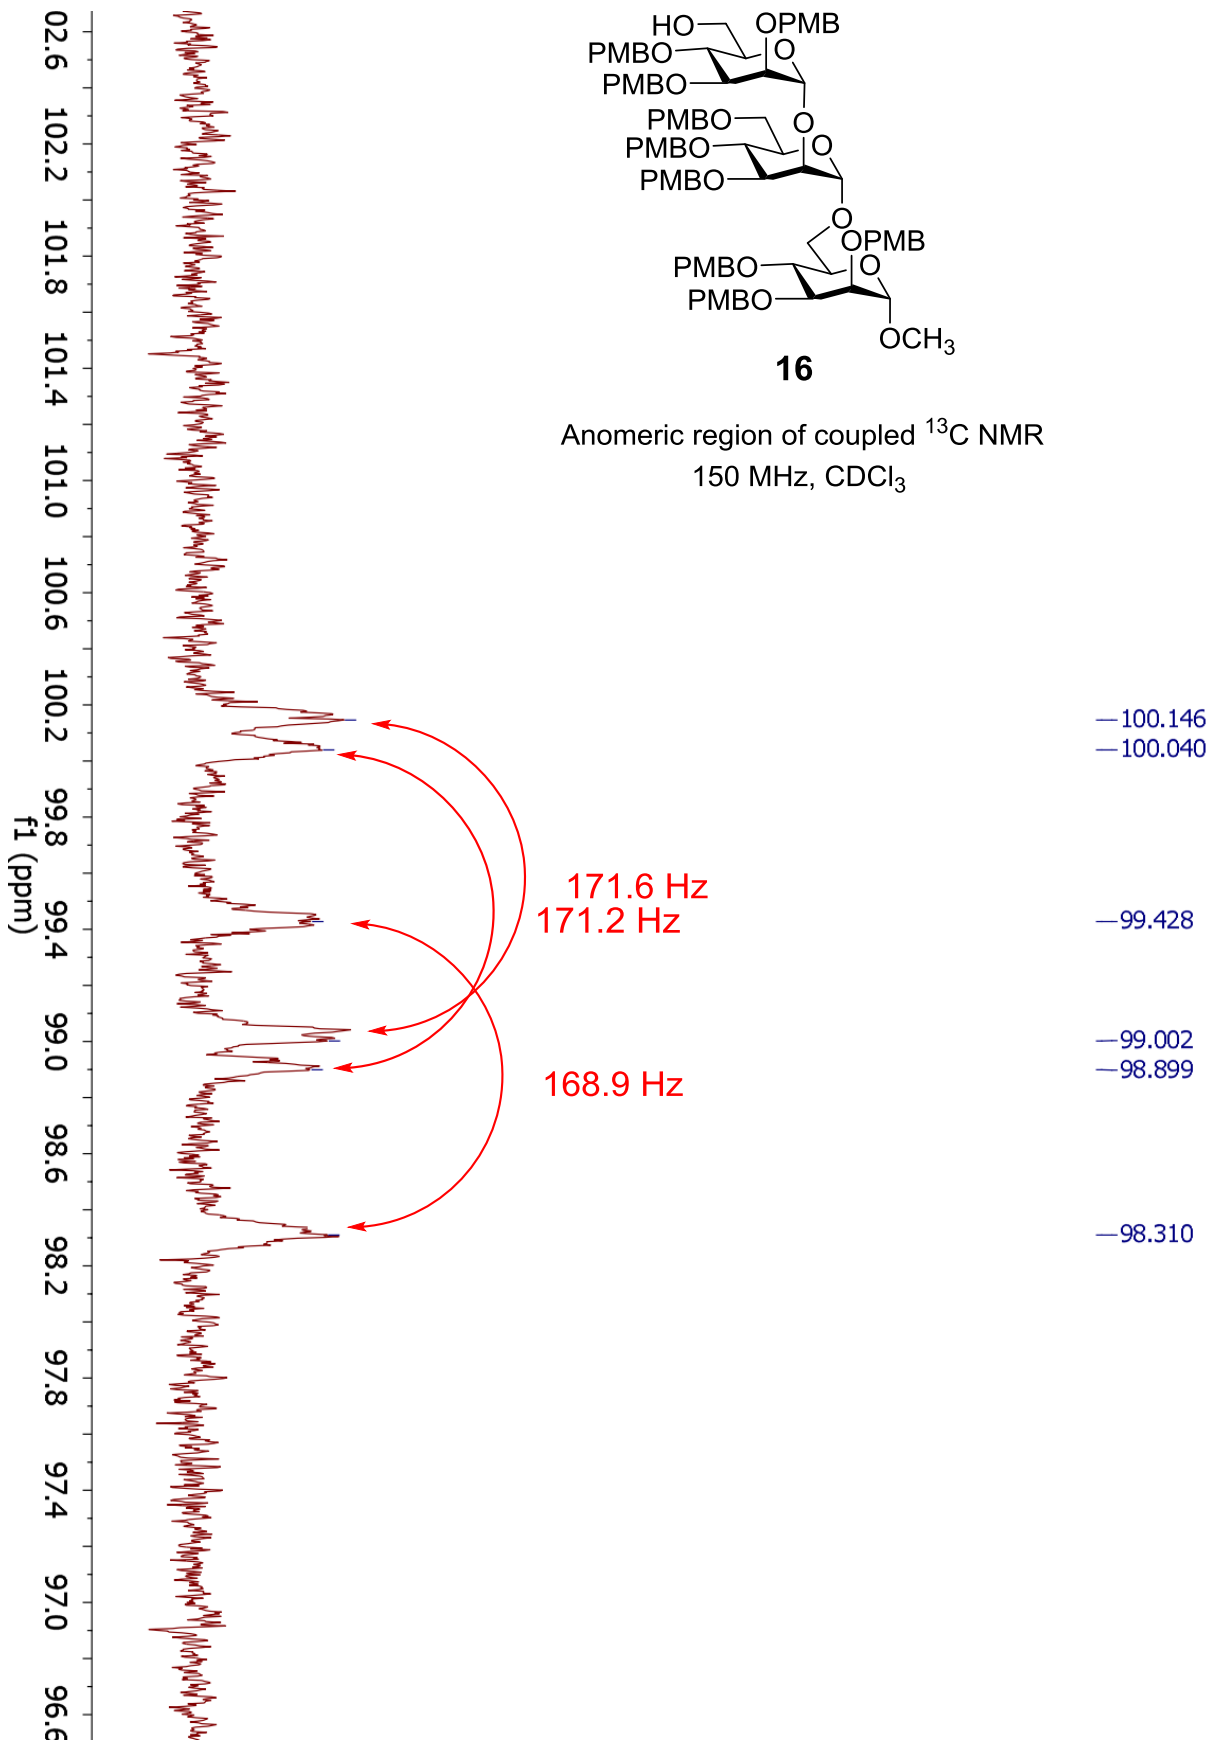





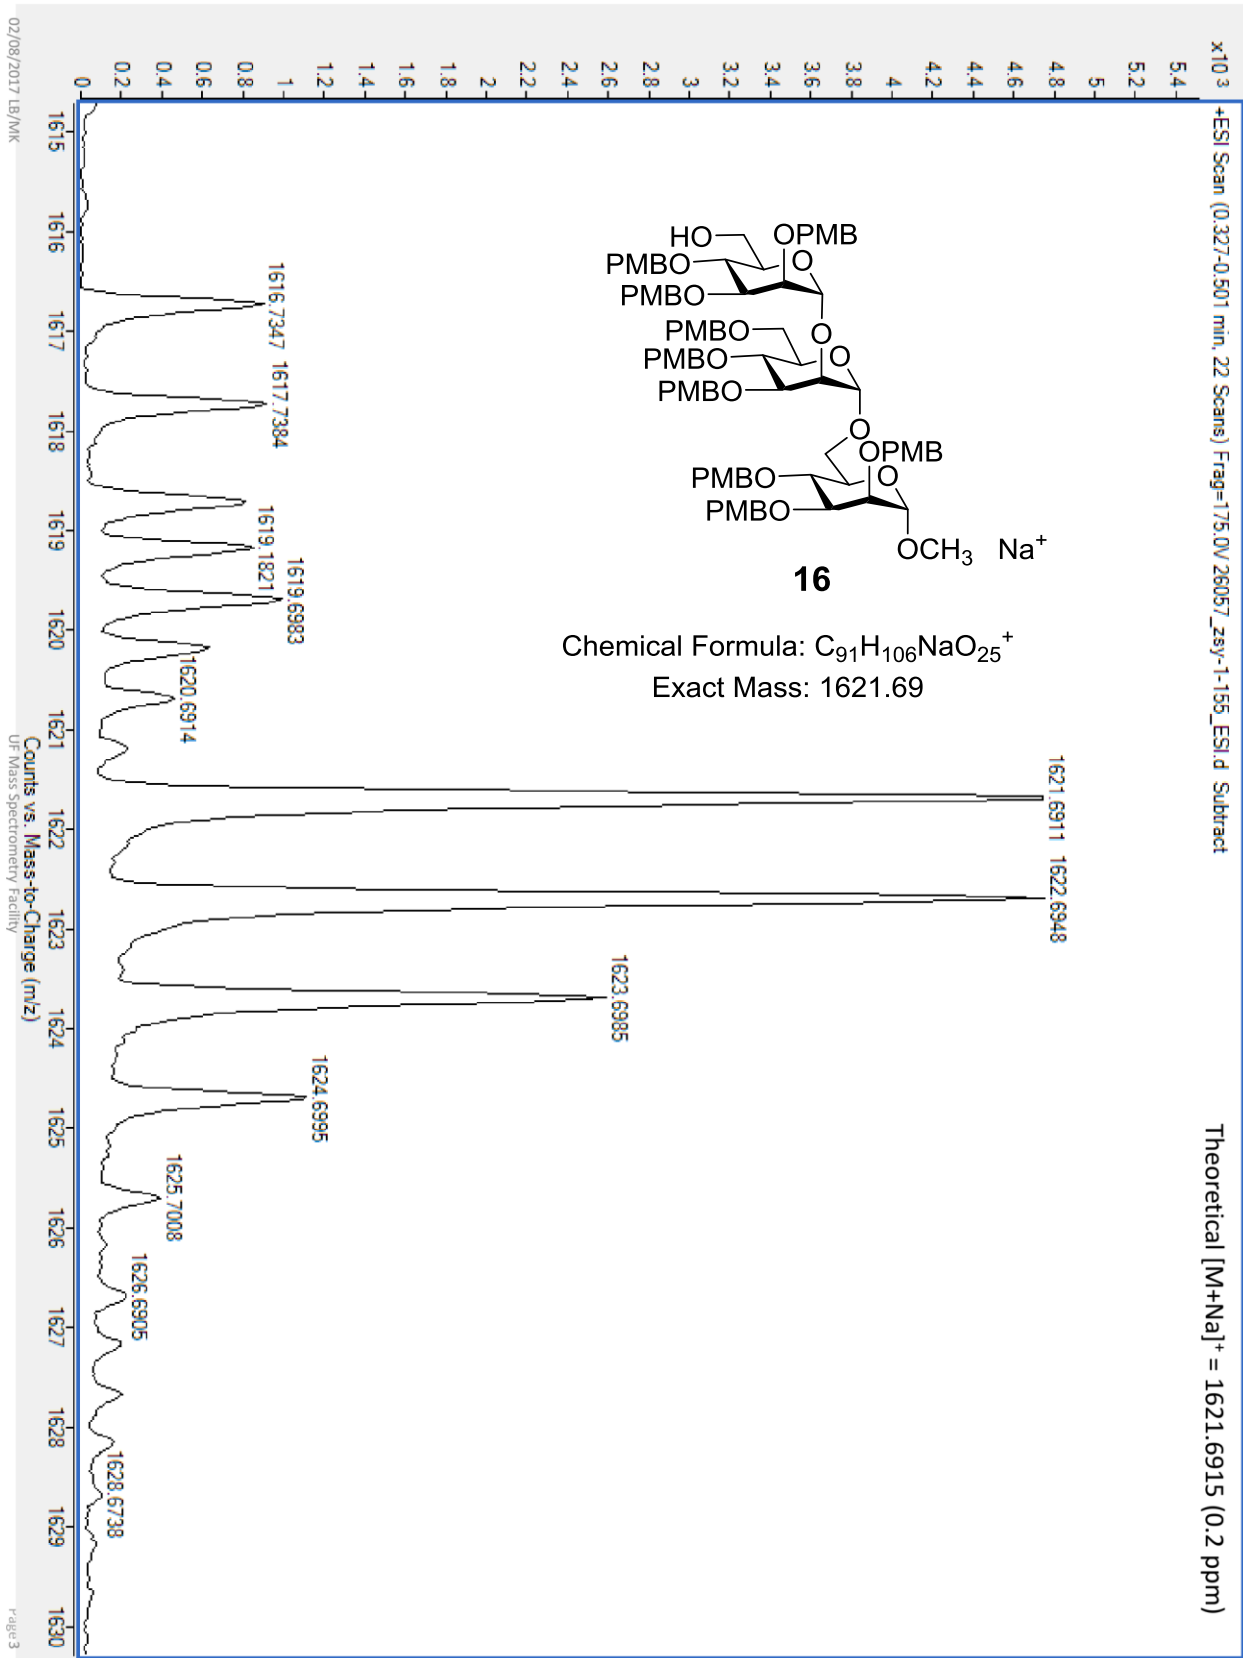



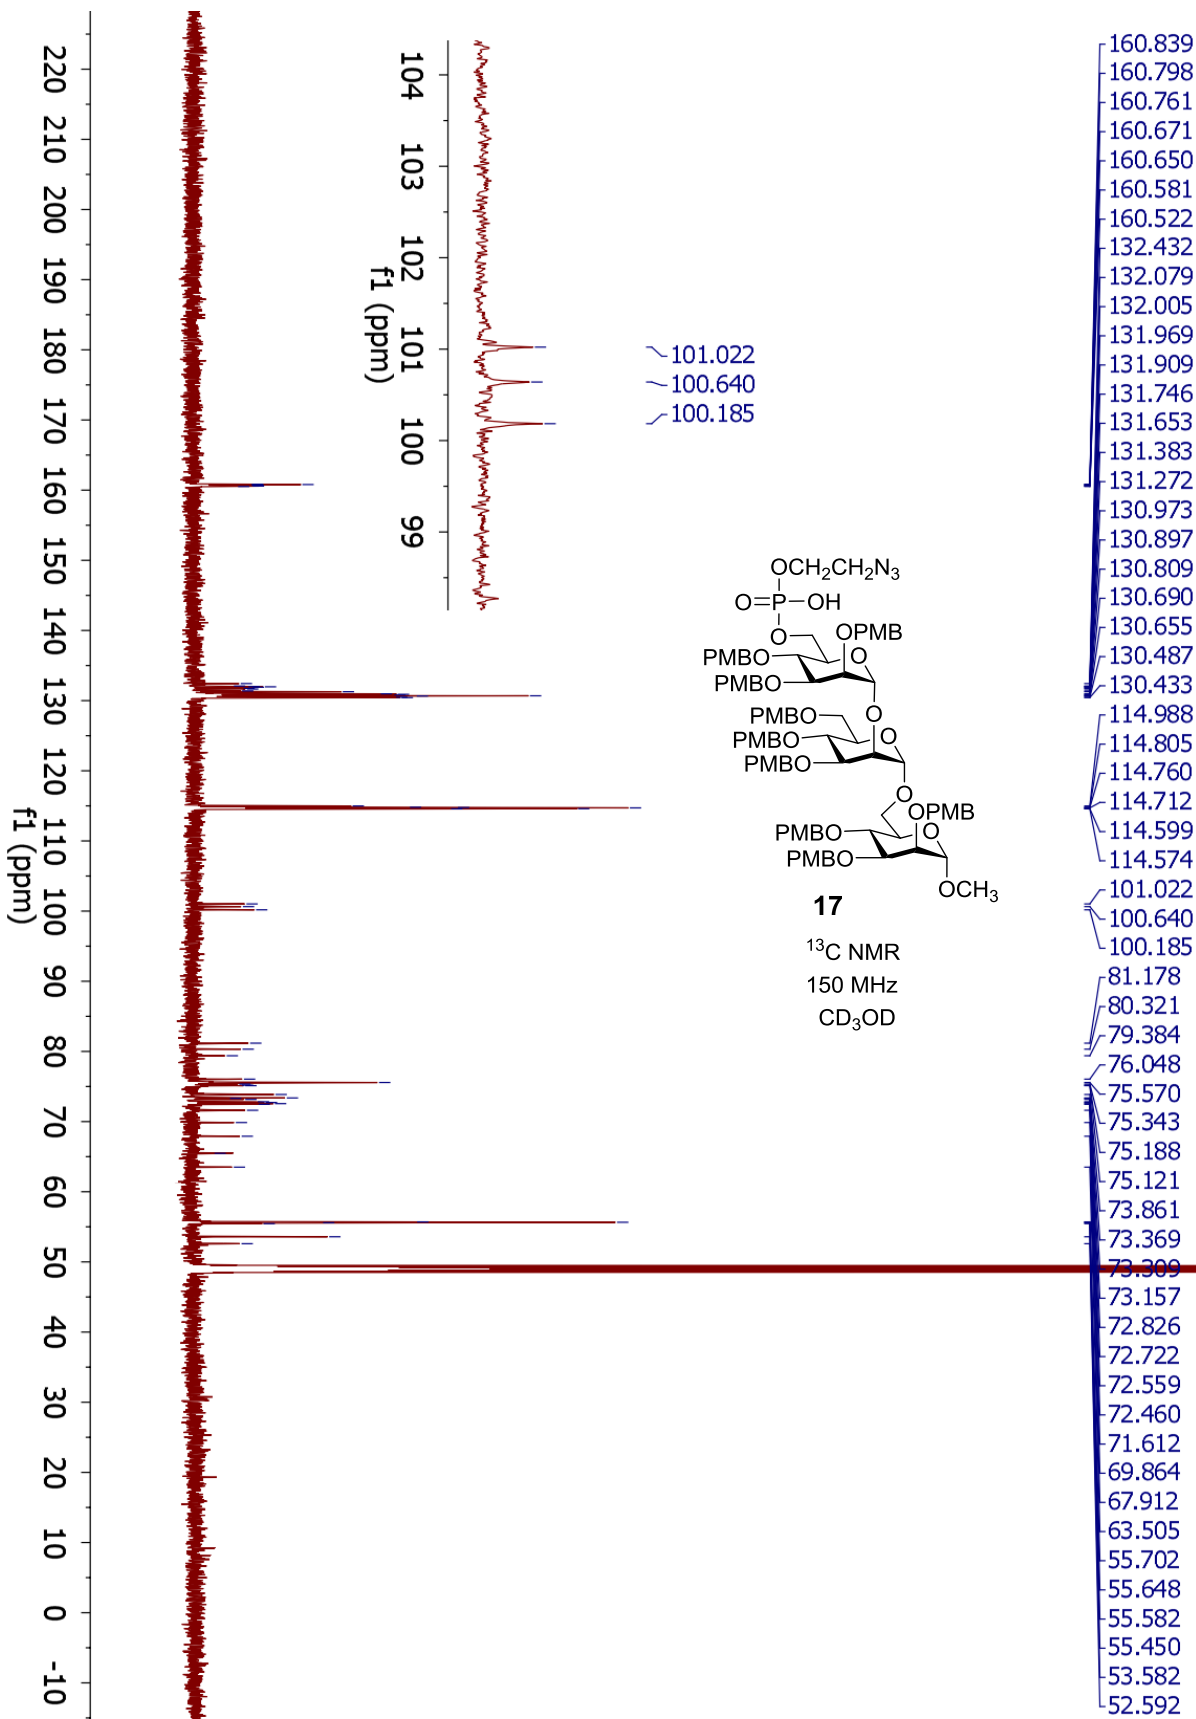



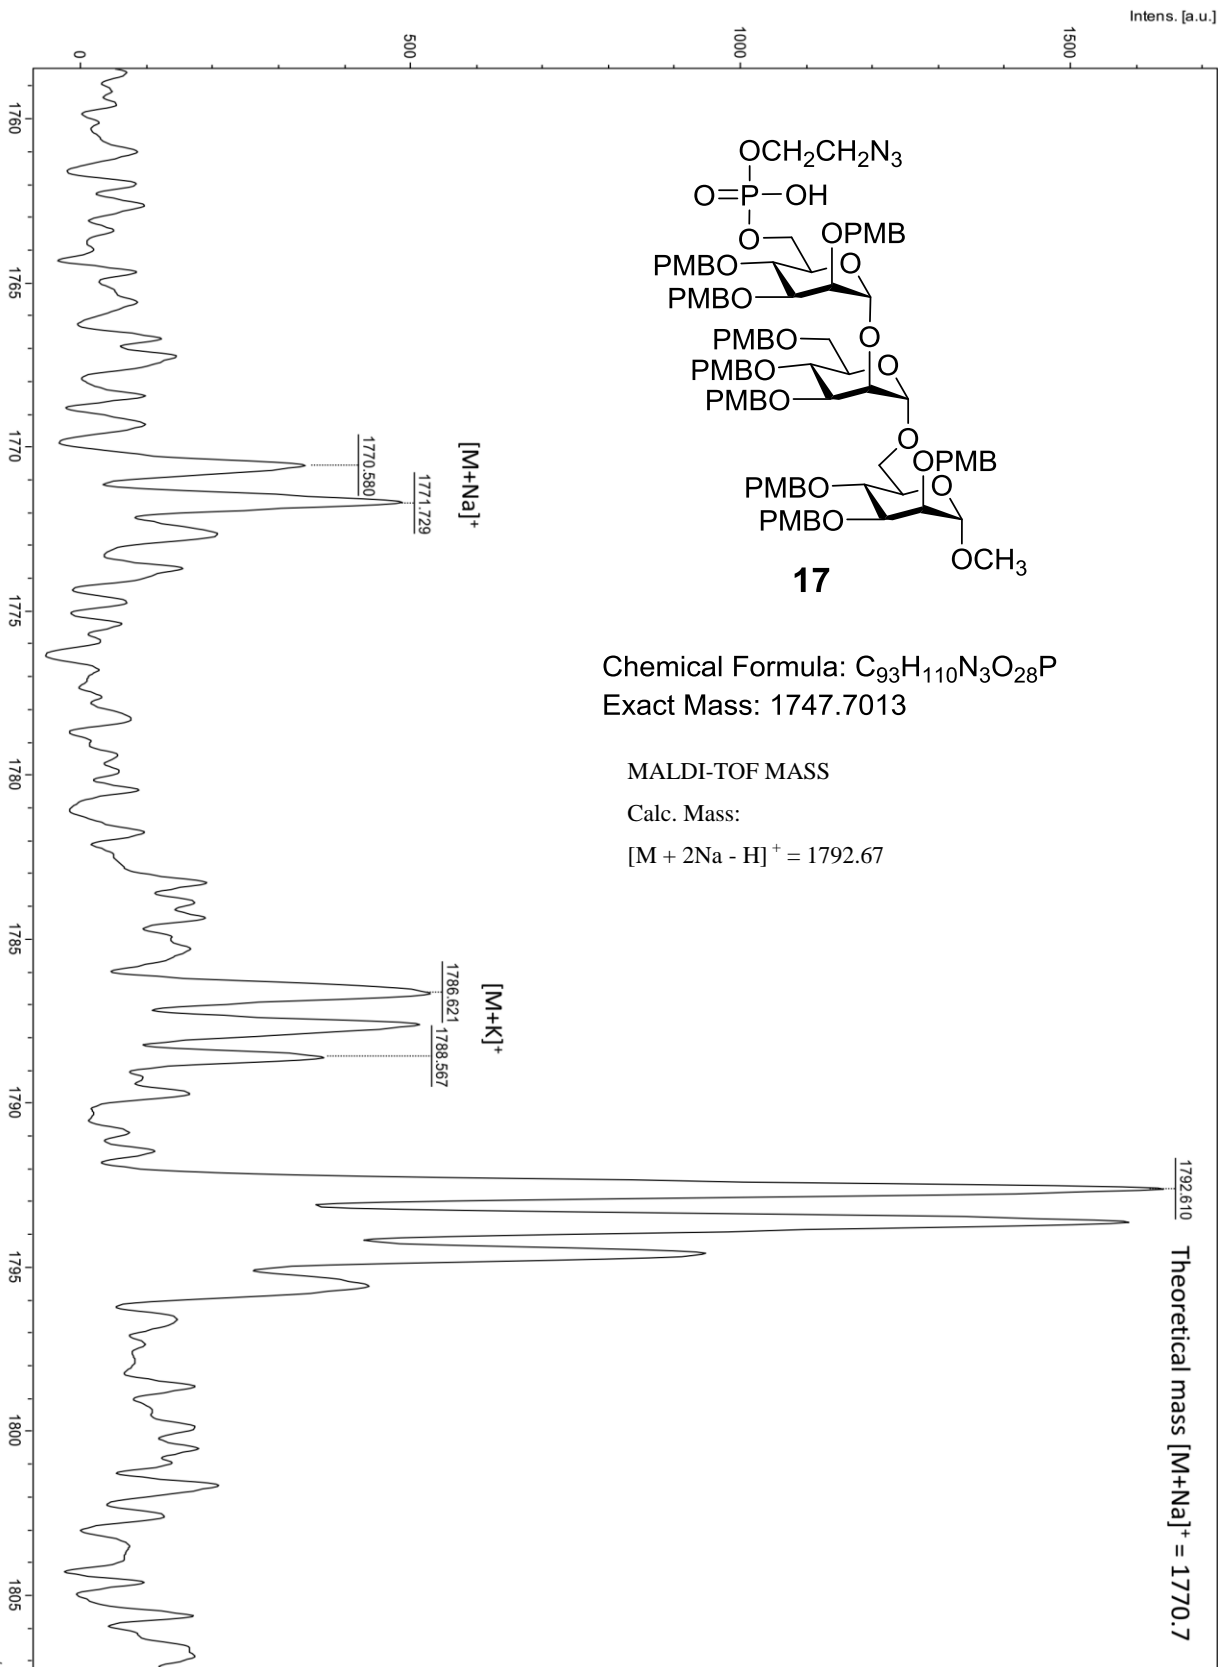

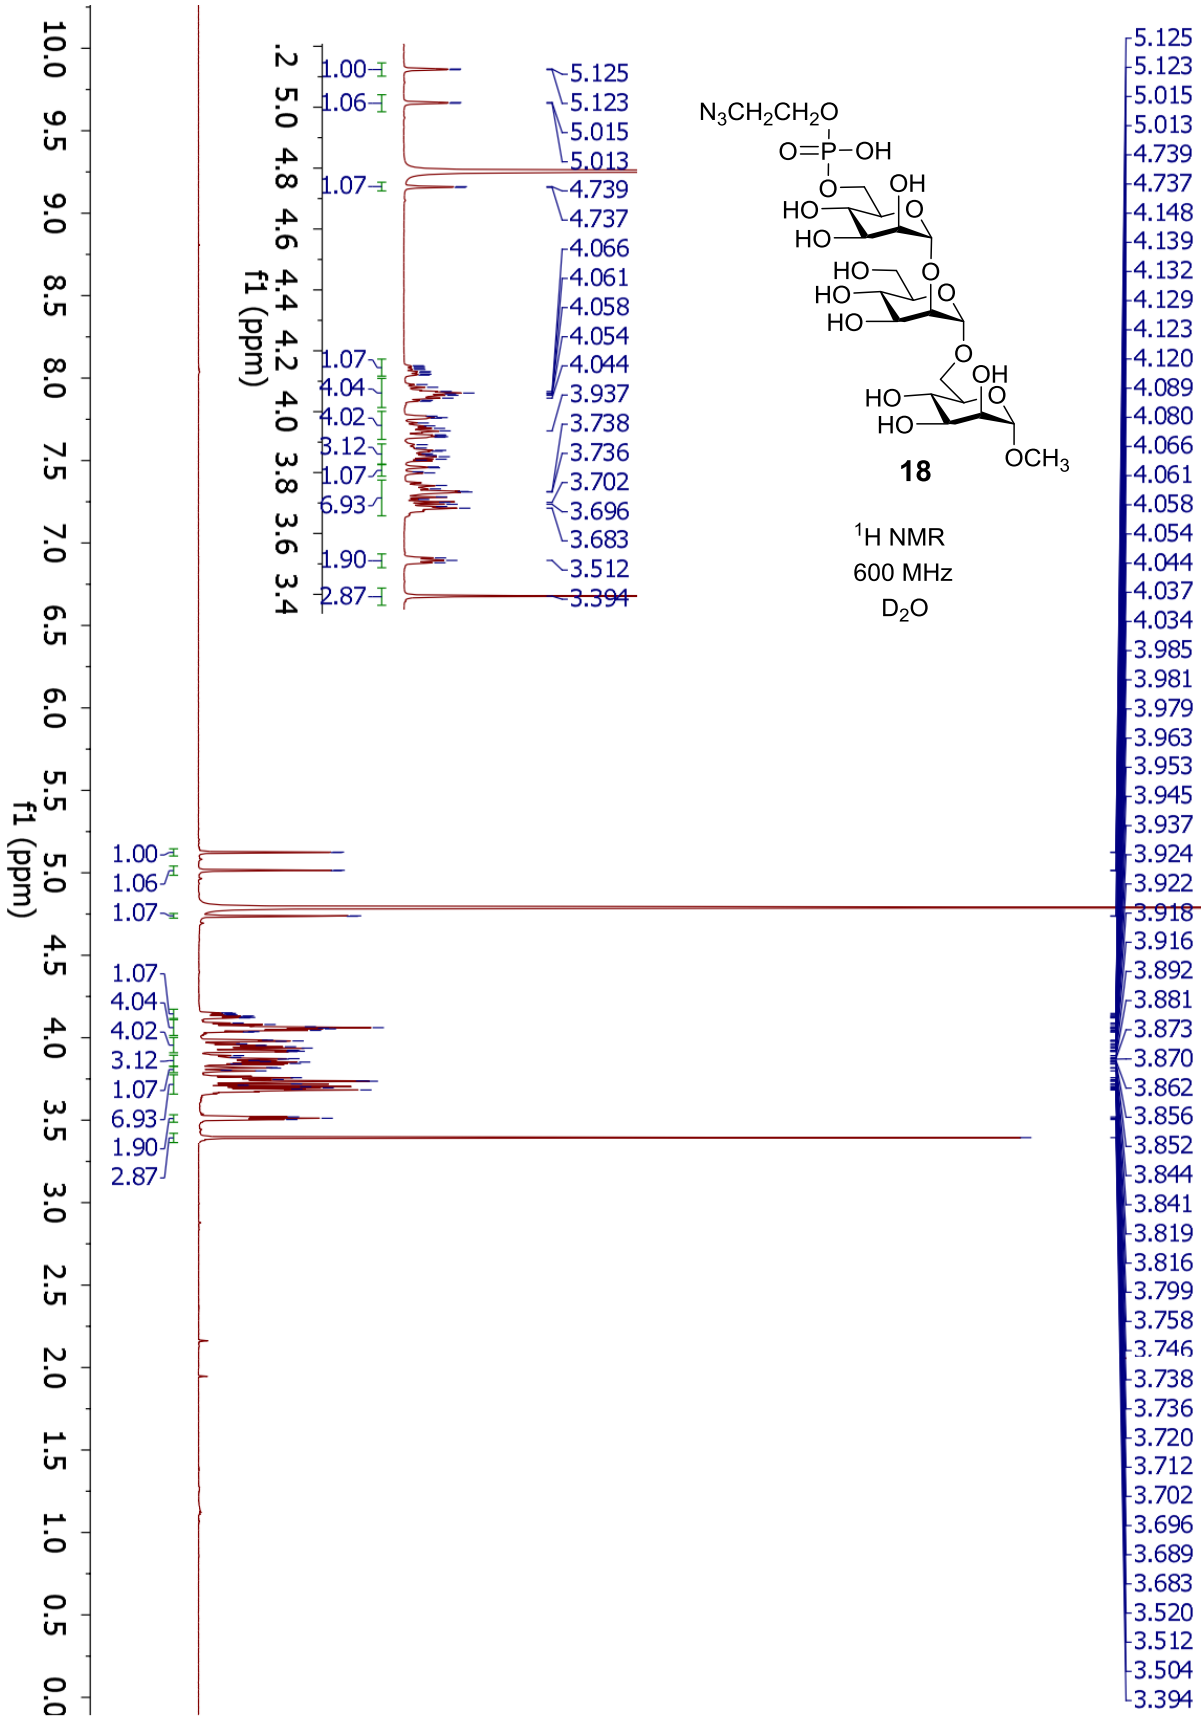

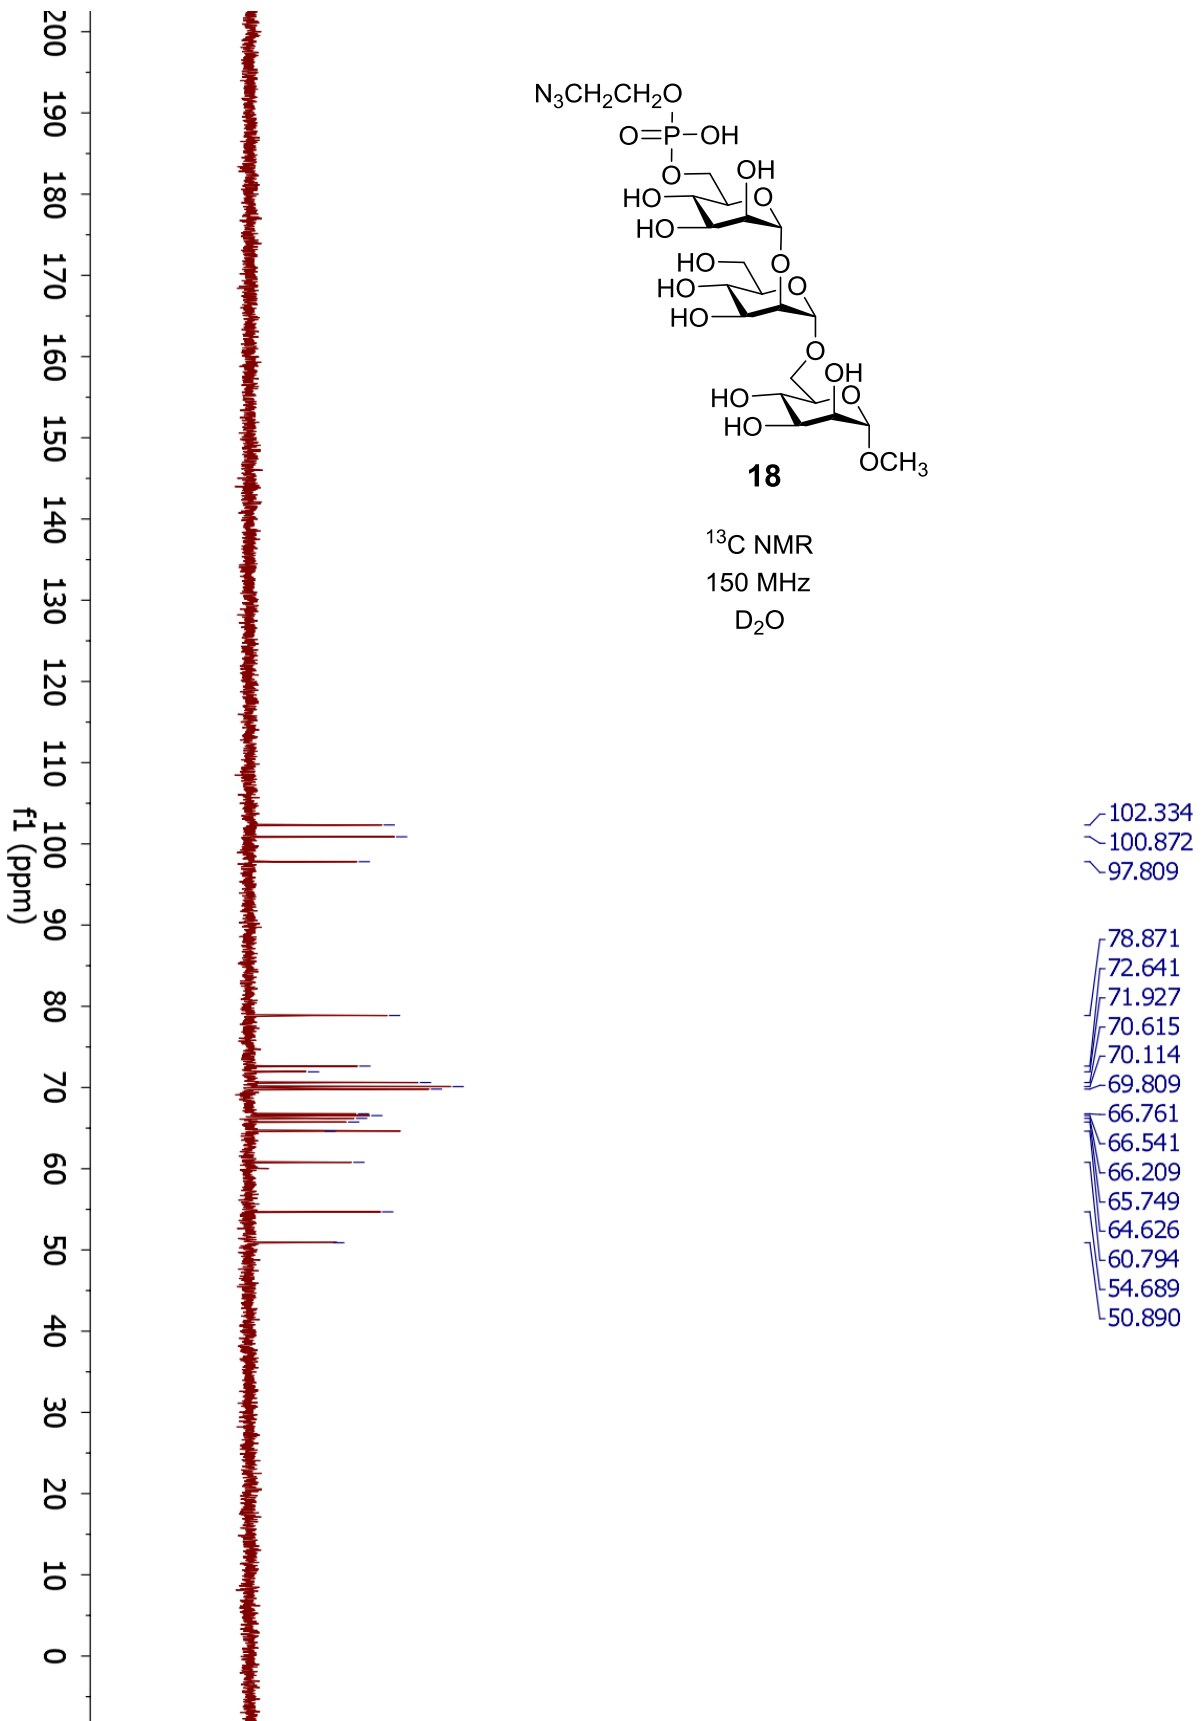

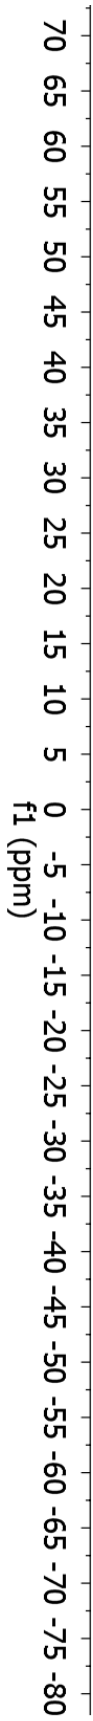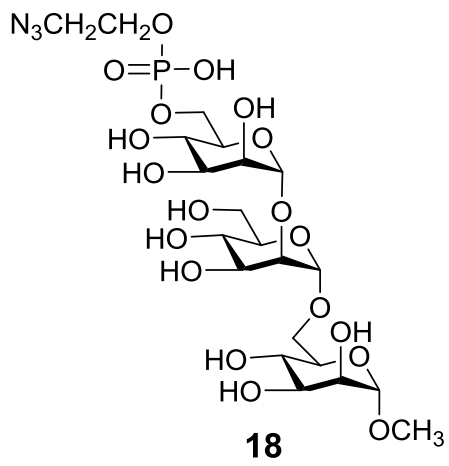

<sup>31</sup>P NMR  
160 MHz  
D<sub>2</sub>O

-0.300

Sample Name:  
 Data collected on: a600-ymms600  
 Archive directory: /home/ymml/ymmsys/probes/probe\_caliba  
 Sample directory:

Fidfile: gcosy  
 Pulse sequence: gcosy  
 Solvent: d2o  
 Data collected on: Jan 4 2016

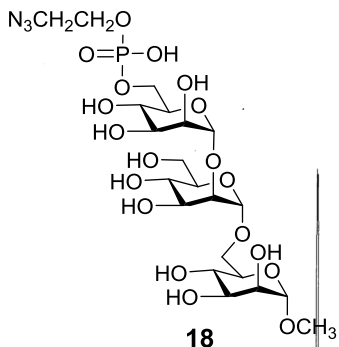

<sup>1</sup>H-<sup>1</sup>H COSY  
 600 MHz  
 D<sub>2</sub>O

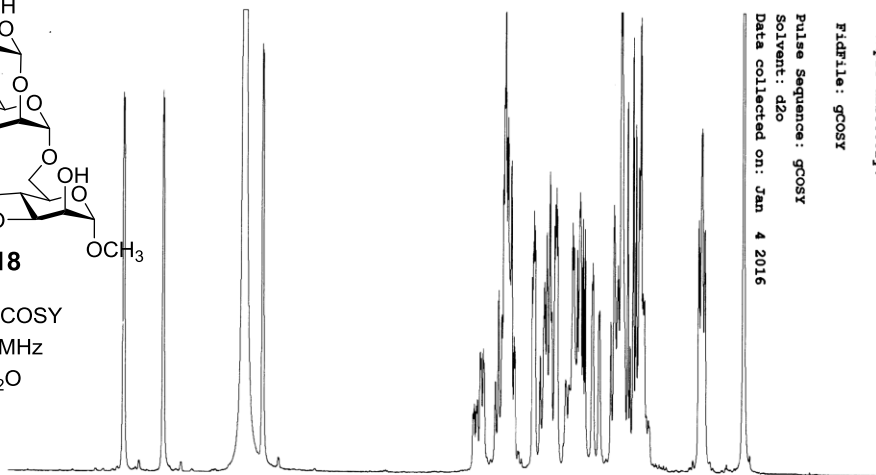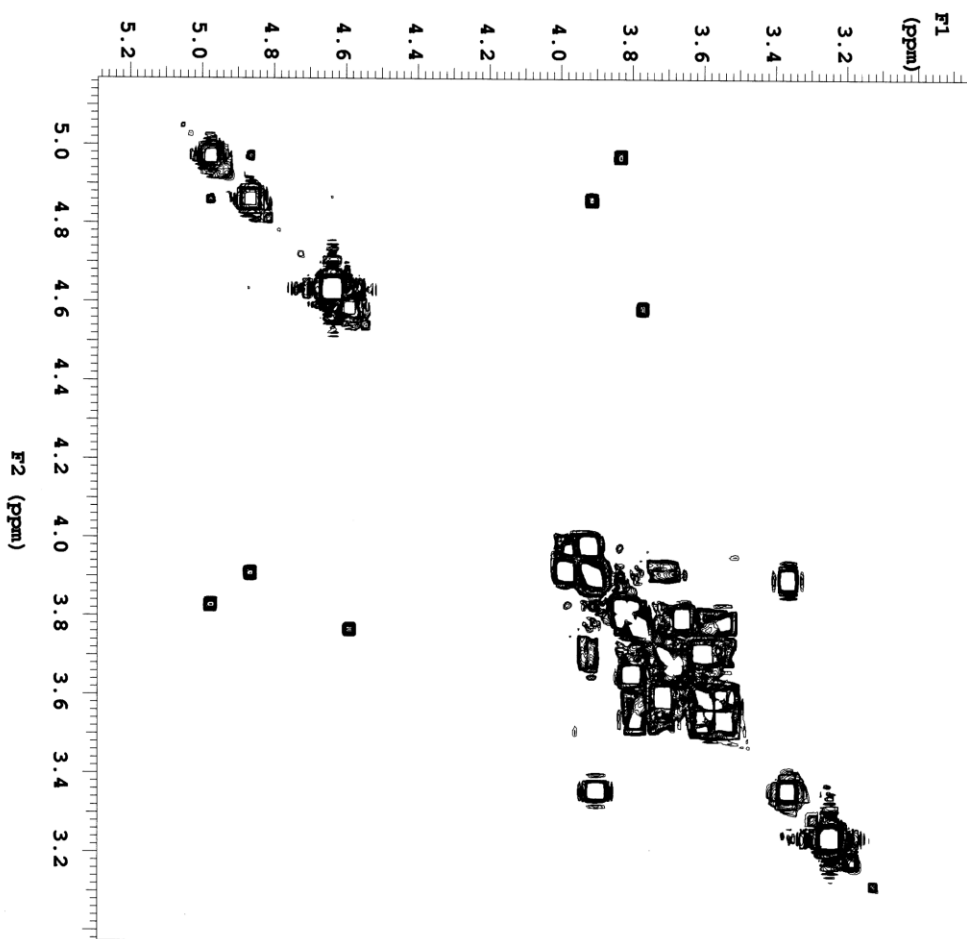

Agilent 600 NMR spectrometer  
 H<sub>2</sub>O C-1 A-1  
 CH<sub>2</sub>N<sub>3</sub>  
 CH<sub>2</sub>N<sub>3</sub>  
 Agilent Technologies

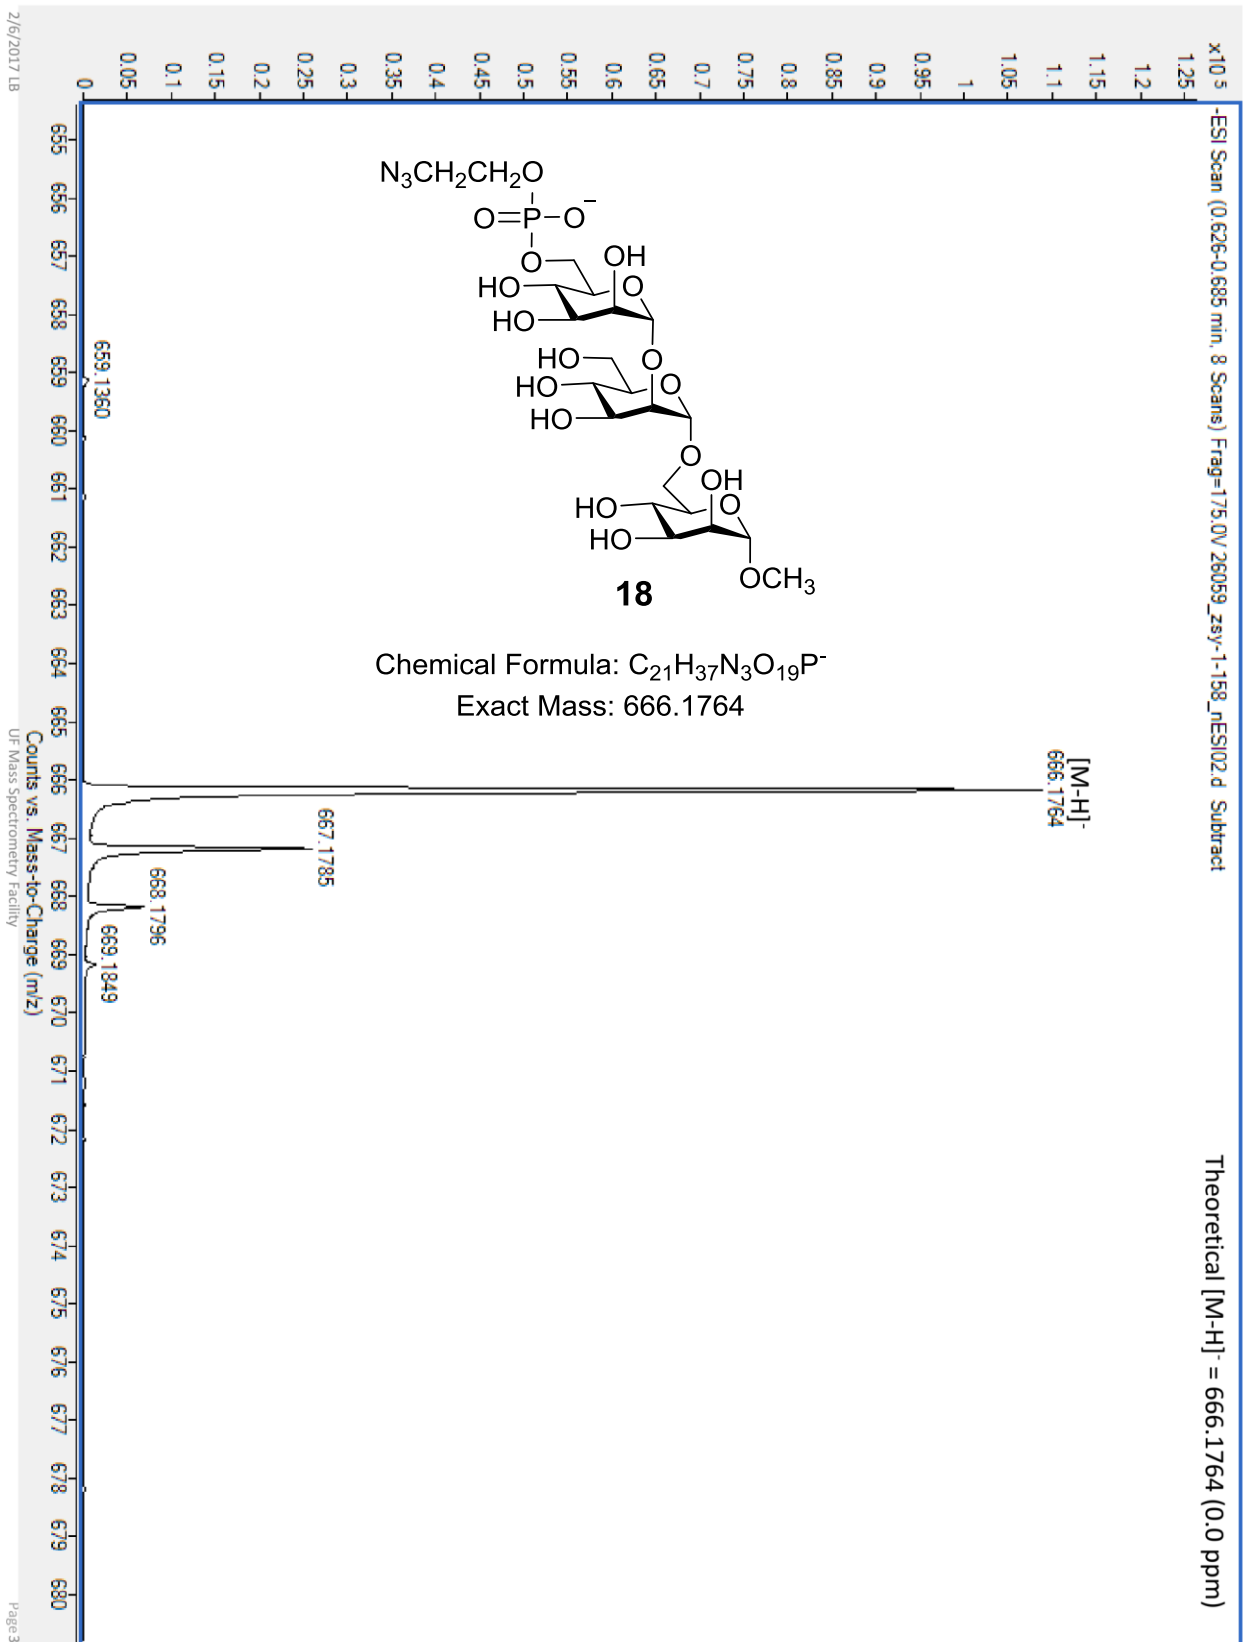

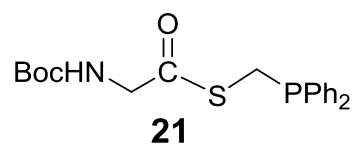

<sup>1</sup>H NMR  
400 MHz  
CDCl<sub>3</sub>

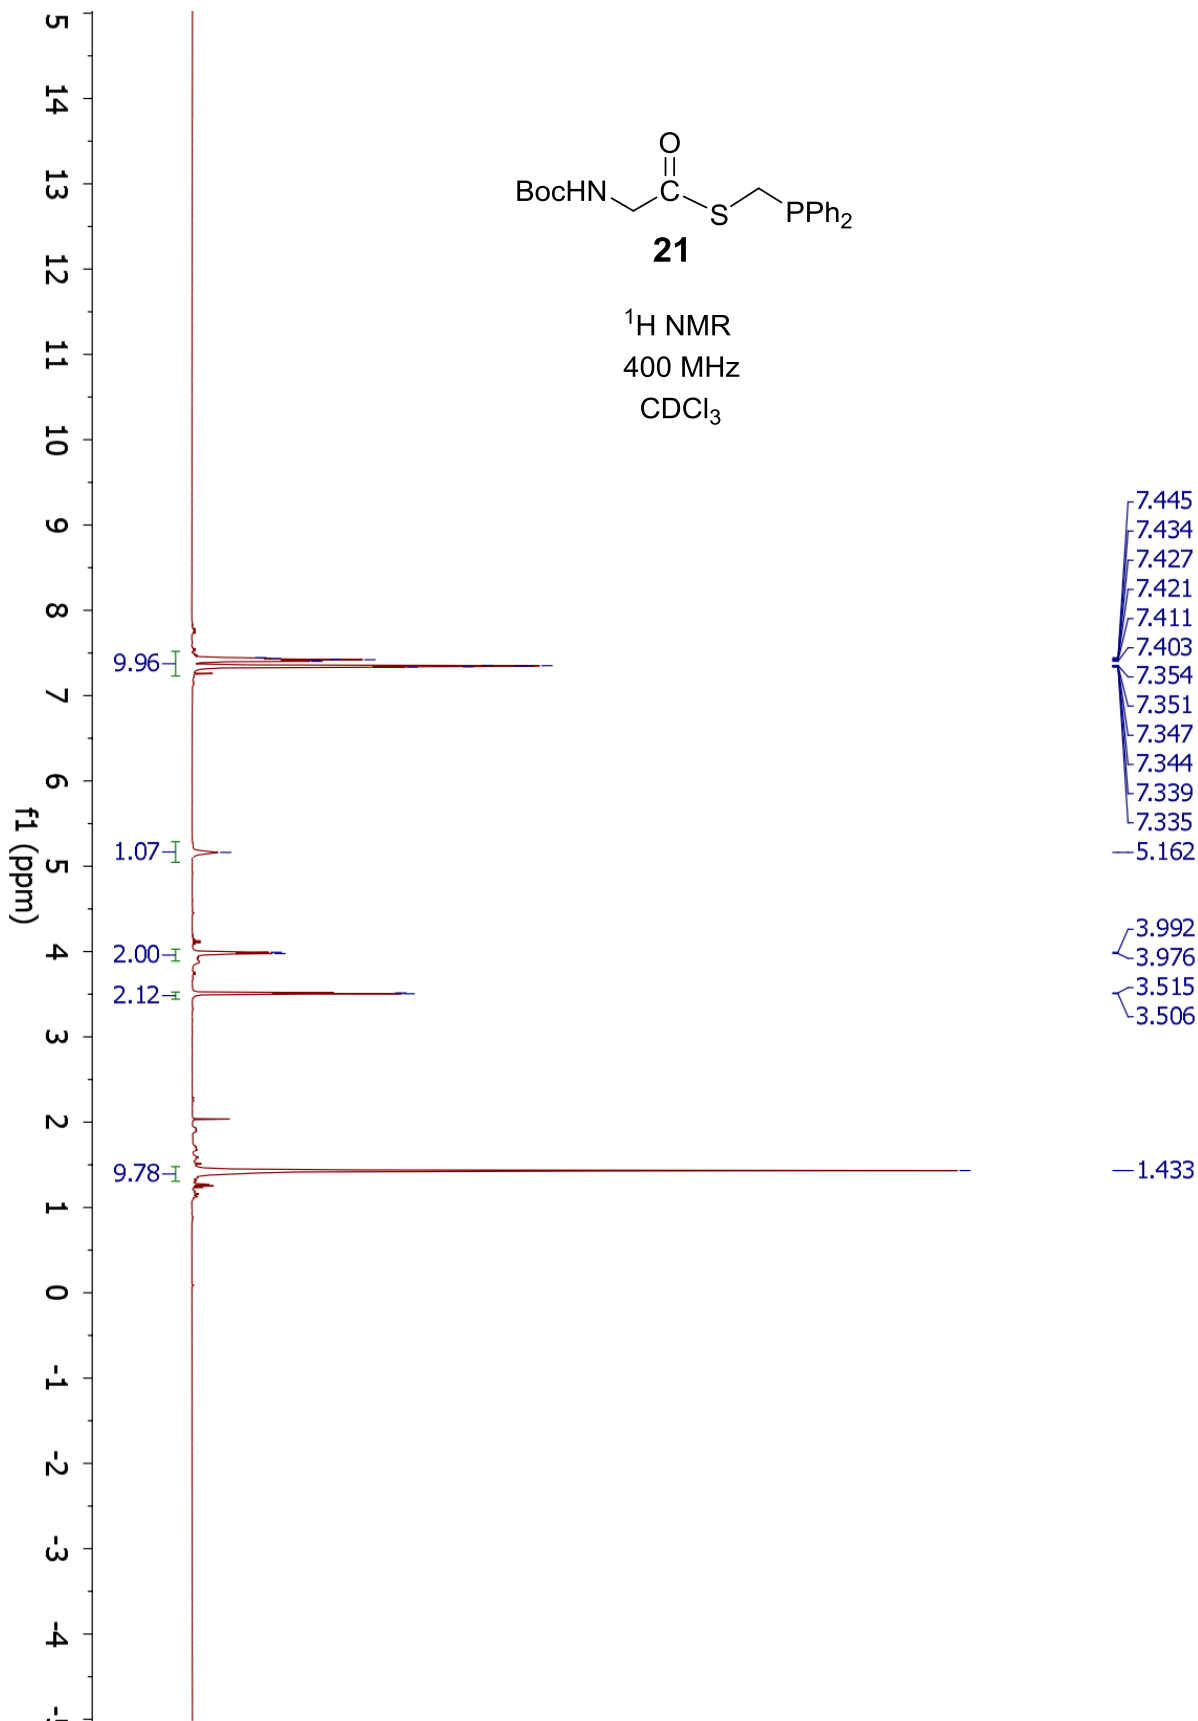

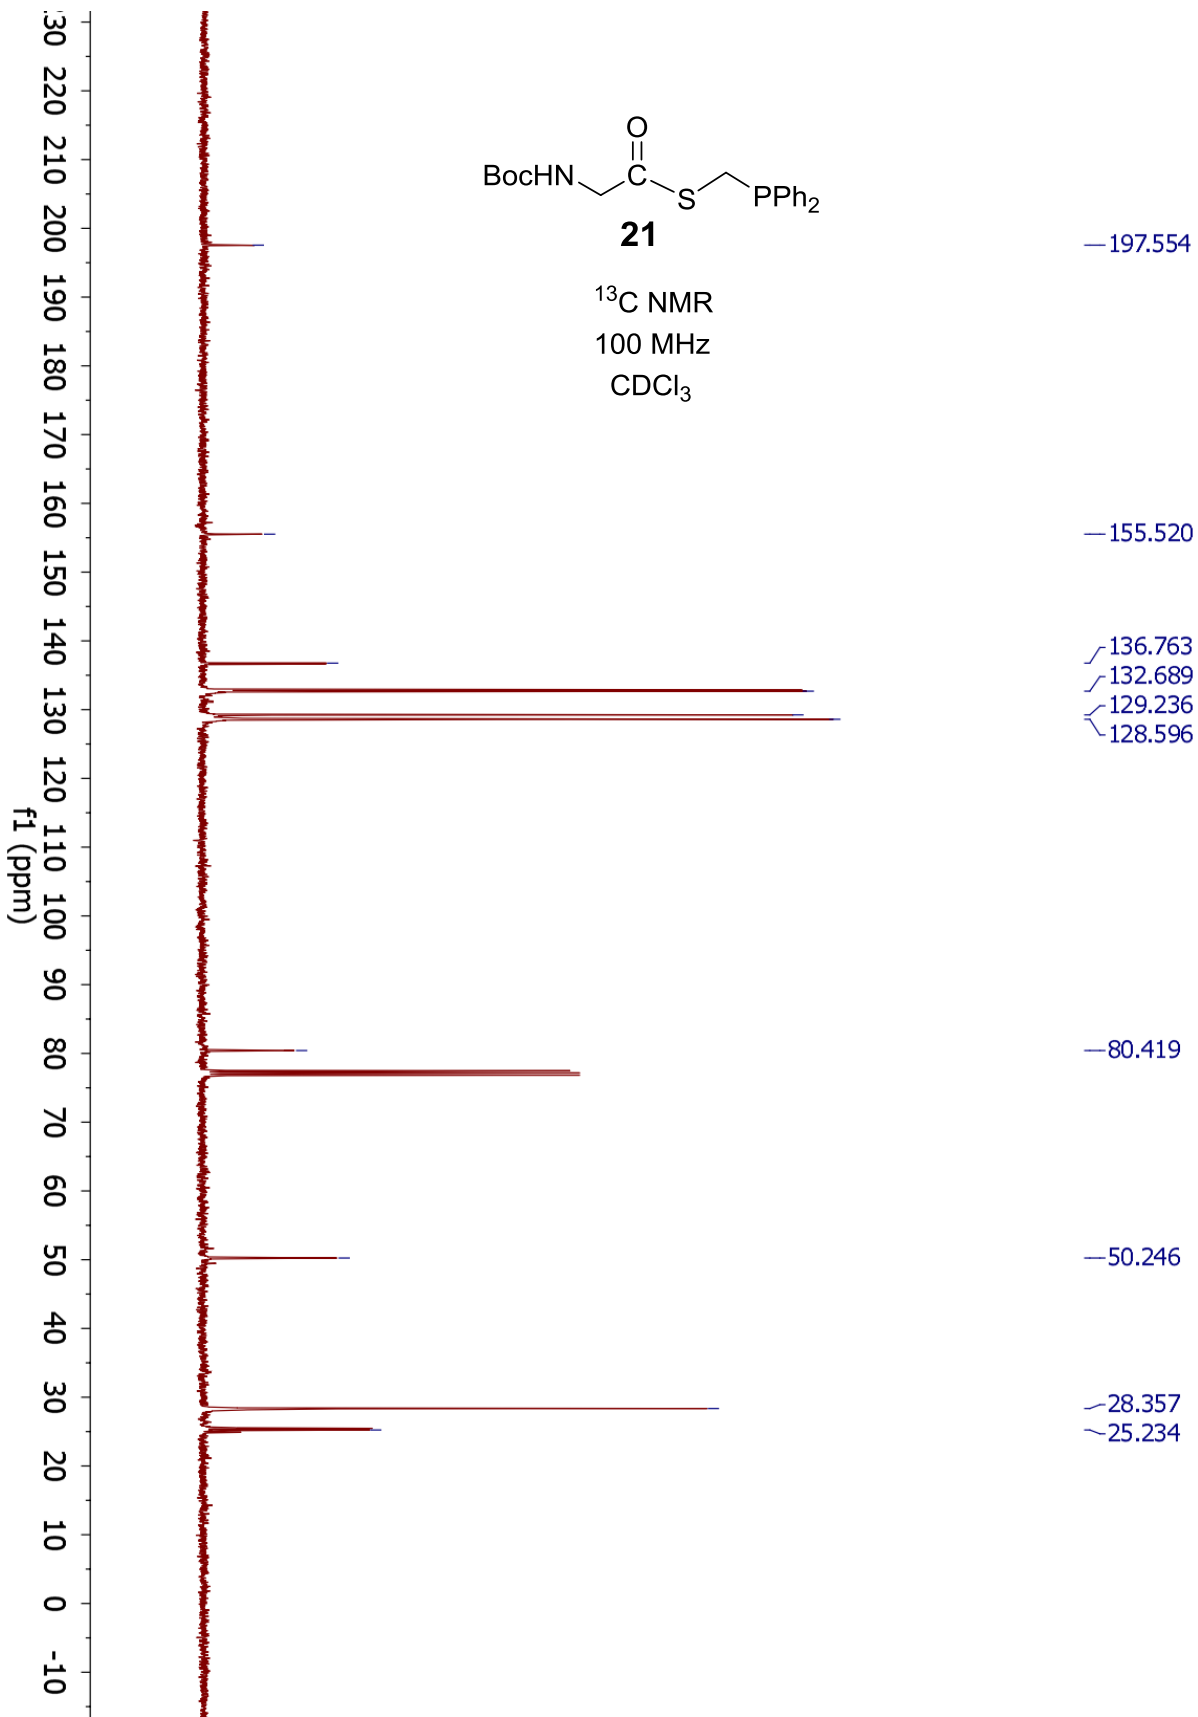



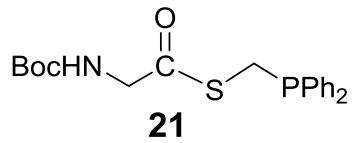

<sup>1</sup>H-<sup>13</sup>C HMQC  
400/100 MHz  
CDCl<sub>3</sub>

| INDEX | FREQUENCY PPM | HEIGHT |
|-------|---------------|--------|
| 1     | 13951.0       | 25.9   |
| 2     | 13332.3       | 25.3   |
| 3     | 12985.2       | 26.5   |
| 4     | 12927.6       | 28.1   |
| 5     | 12920.9       | 28.4   |
| 6     | 2845.6        | 33.1   |

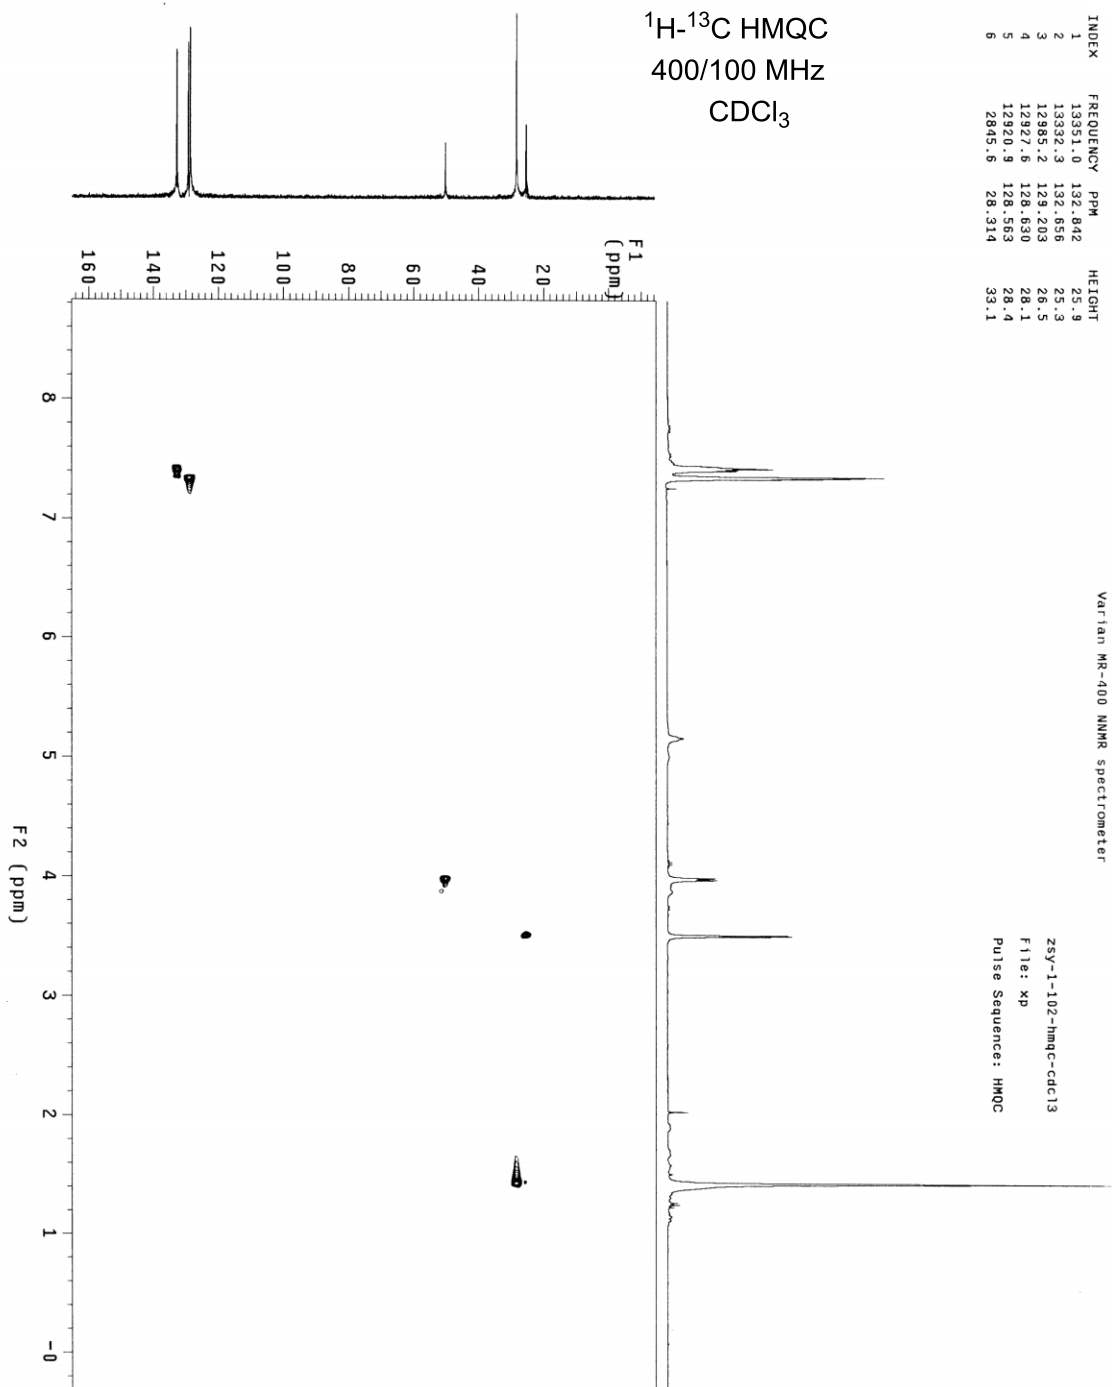

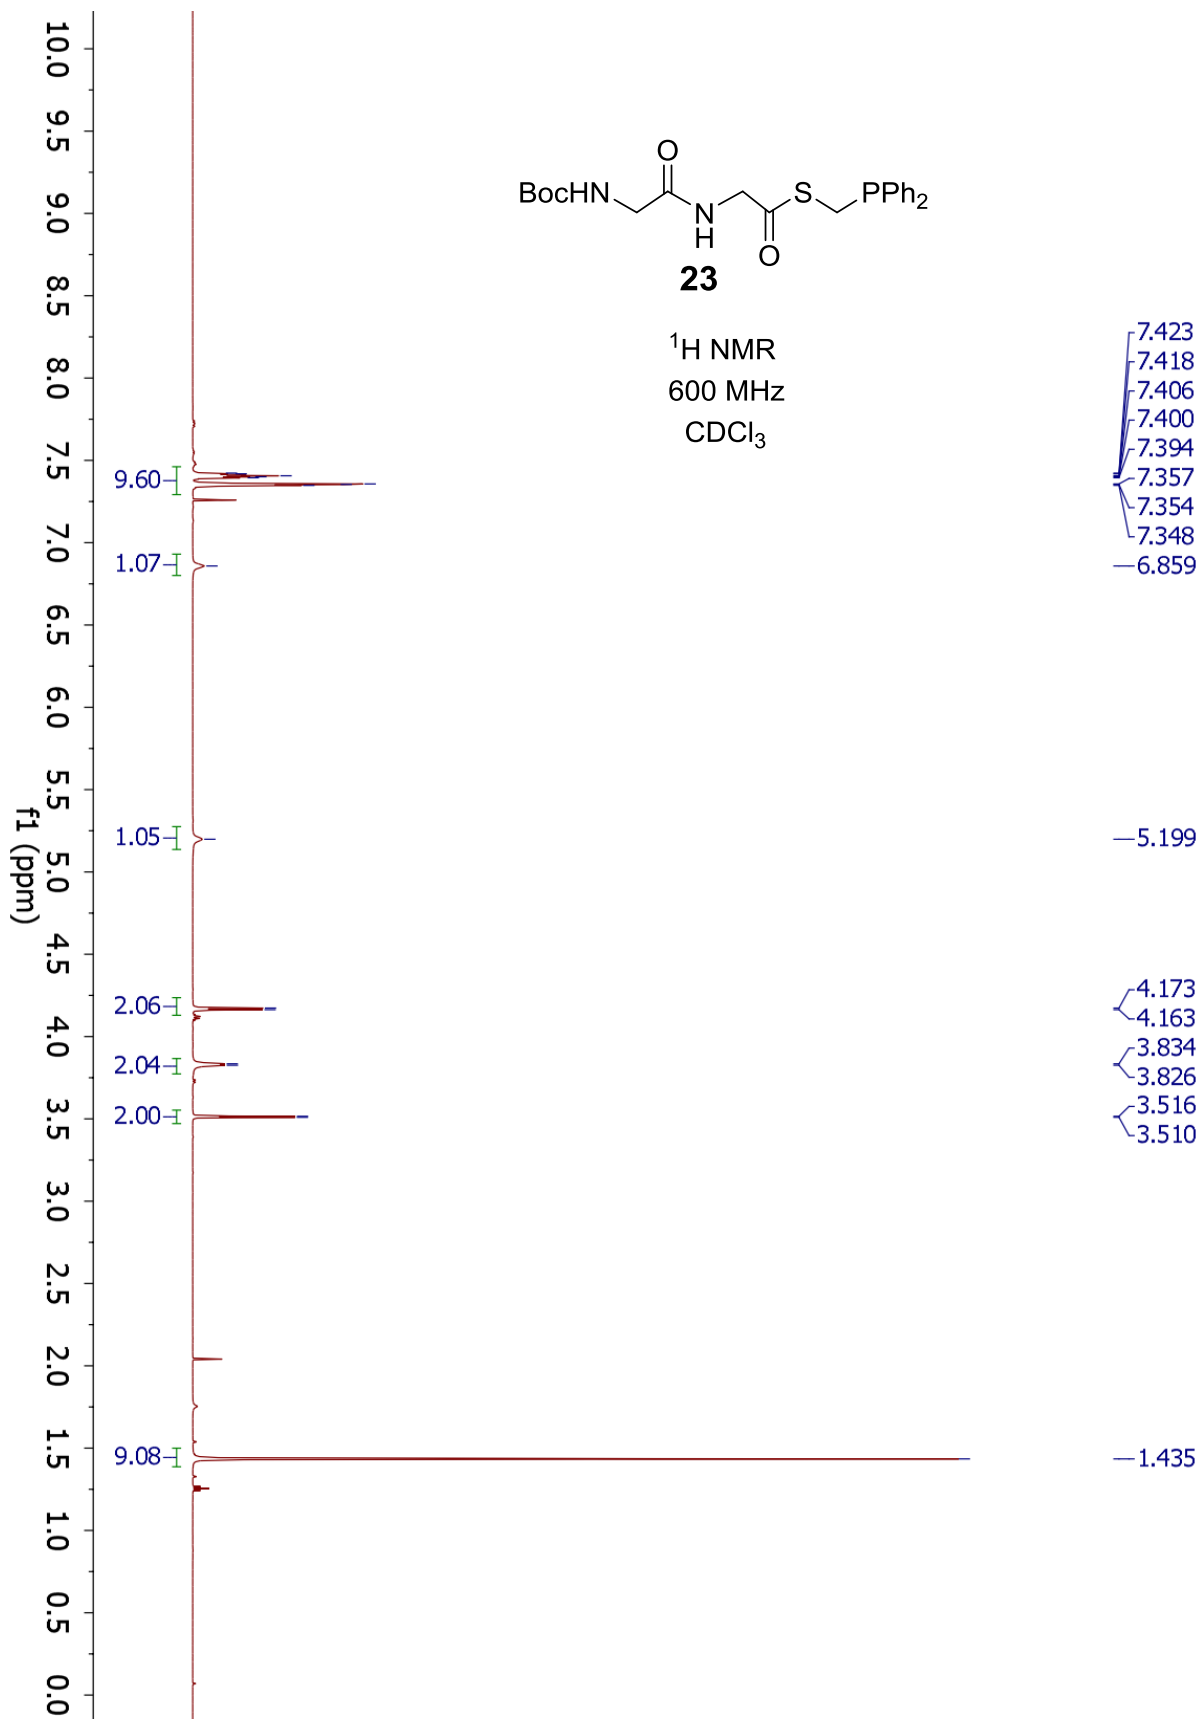

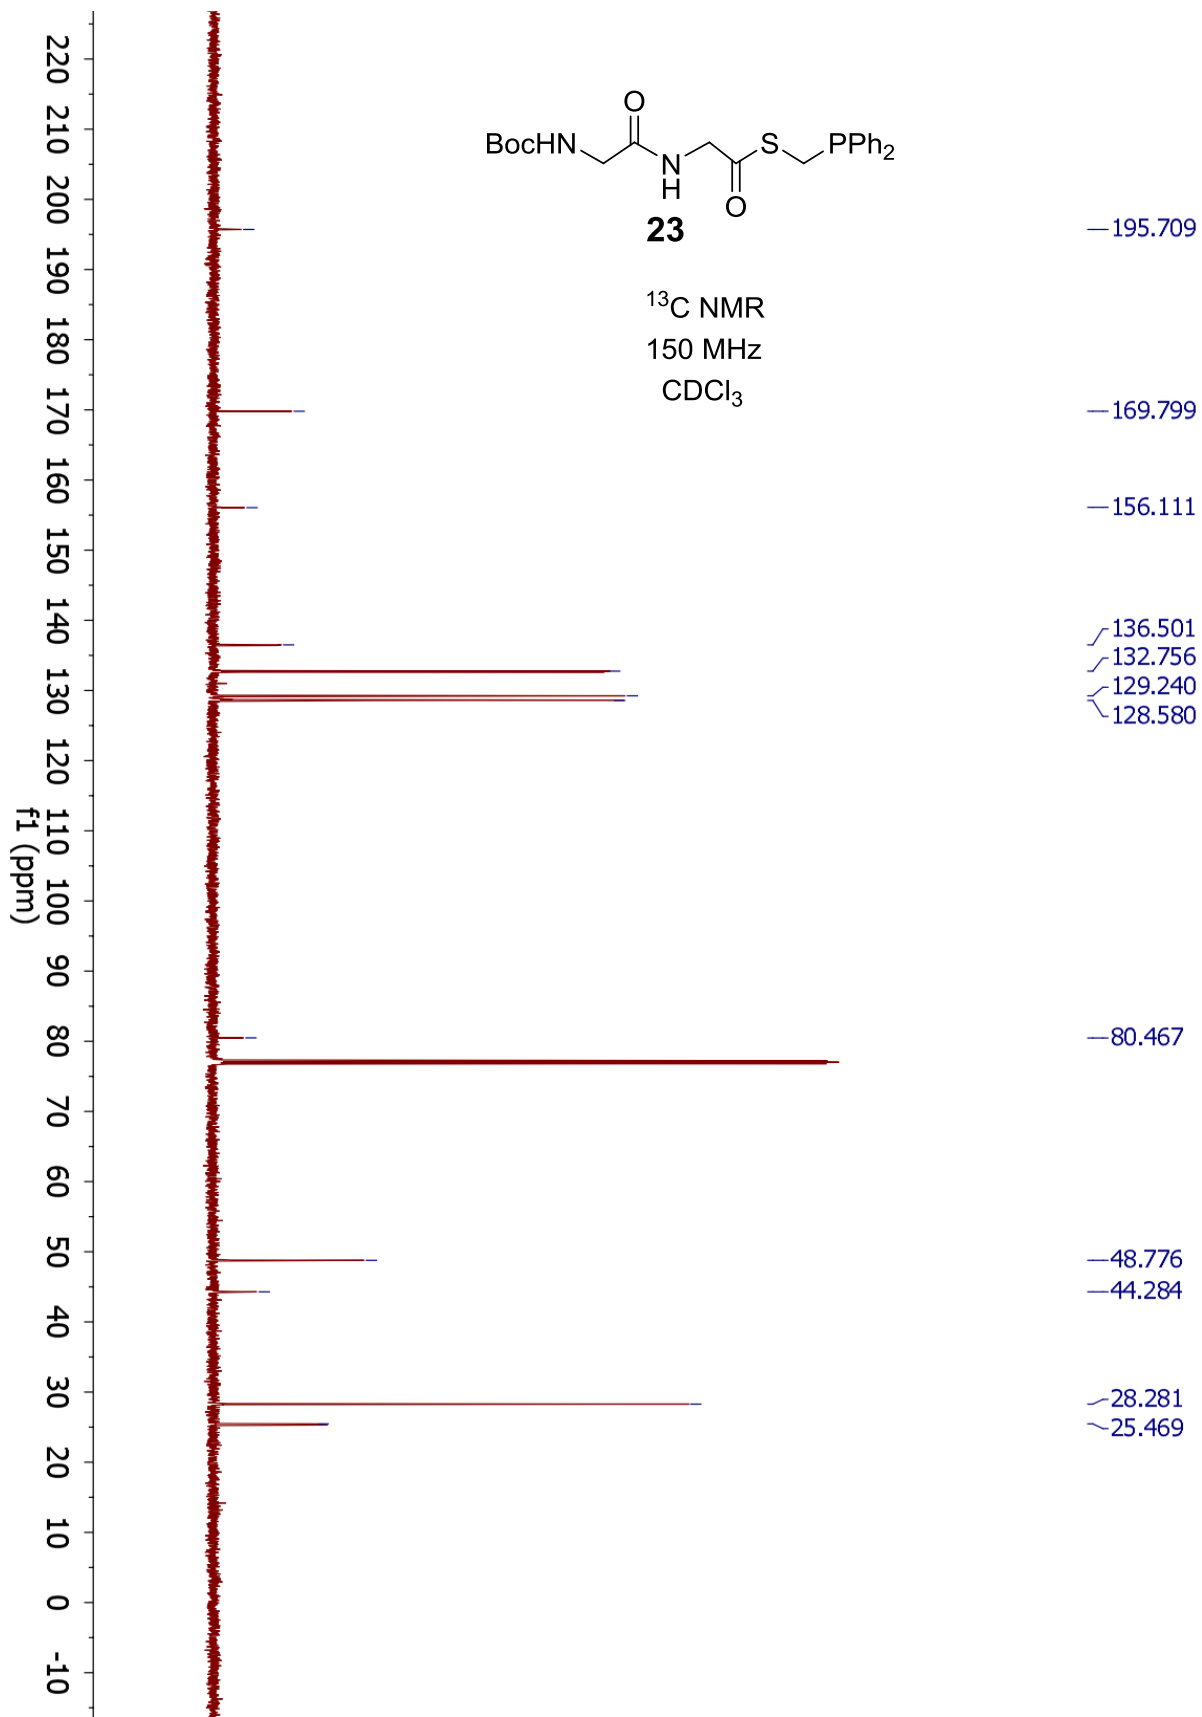

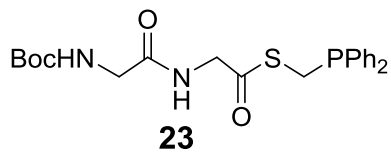

$^1\text{H}$ - $^{13}\text{C}$  HMQC  
600/150 MHz  
 $\text{CDCl}_3$

|   |         |         |       |
|---|---------|---------|-------|
| 1 | 20023.4 | 132.771 | -32.6 |
| 2 | 20004.4 | 132.644 | -31.2 |
| 3 | 19493.3 | 129.256 | -32.9 |
| 4 | 19400.7 | 128.642 | -33.0 |
| 5 | 19394.0 | 128.597 | -29.1 |
| 6 | 4264.8  | 28.279  | 23.3  |

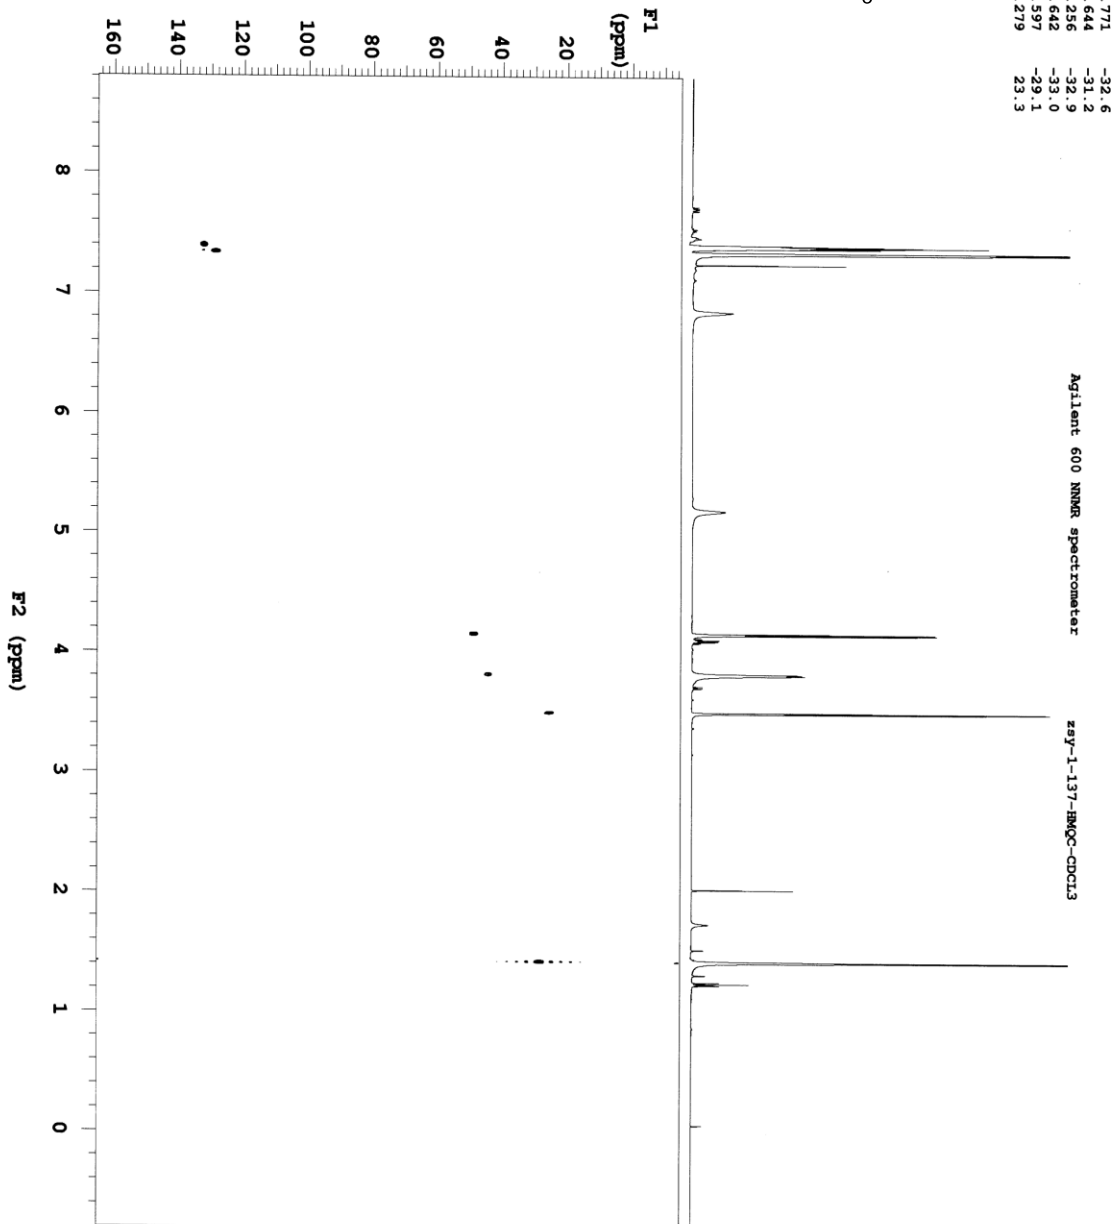

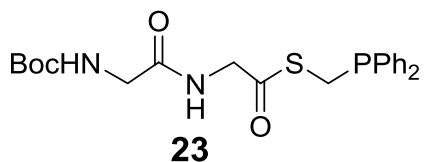

Chemical Formula: C<sub>22</sub>H<sub>27</sub>N<sub>2</sub>O<sub>4</sub>PS  
 Exact Mass: 446.1429

HR ESI-TOF MS

Calc. Mass:

[M + H]<sup>+</sup> = 447.1507

[M + Na]<sup>+</sup> = 469.1327

[M + K]<sup>+</sup> = 485.1066

### Elemental Composition Report

#### Single Mass Analysis

Tolerance = 10.0 PPM / DBE: min = -1.5, max = 100.0

Element prediction: Off

Number of isotope peaks used for i-FIT = 6

Monoisotopic Mass, Even Electron Ions

934 formula(e) evaluated with 4 results within limits (all results (up to 1000) for each mass)

Elements Used:

C: 22-22 H: 0-40 N: 0-5 O: 0-10 Na: 0-1 31P: 0-1 S: 0-1 39K: 0-1

S.Zhu ZSY-1-137 in AcN Cone(V)50

LCT Premier KD128  
 TOF MS ES+

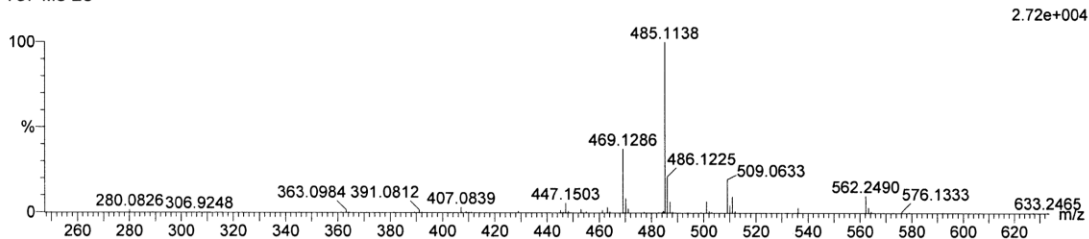

Minimum:

Maximum: 3.0 10.0 -1.5

Mass Calc. Mass mDa PPM DBE i-FIT i-FIT (Norm) Formula

|          |          |      |      |      |      |                           |                        |
|----------|----------|------|------|------|------|---------------------------|------------------------|
| 447.1503 | 447.1507 | -0.4 | -0.9 | 10.5 | 39.9 | 1.4                       | C22 H28 N2 O4<br>31P S |
| 447.1485 | 1.8      | 4.0  | 8.5  | 39.8 | 1.3  | C22 H29 N2 O2 Na<br>S 39K |                        |
| 447.1525 | -2.2     | -4.9 | 6.5  | 40.0 | 1.5  | C22 H33 O3 31P S<br>39K   |                        |
| 447.1467 | 3.6      | 8.1  | 12.5 | 39.8 | 1.3  | C22 H24 N4 O3 Na<br>S     |                        |

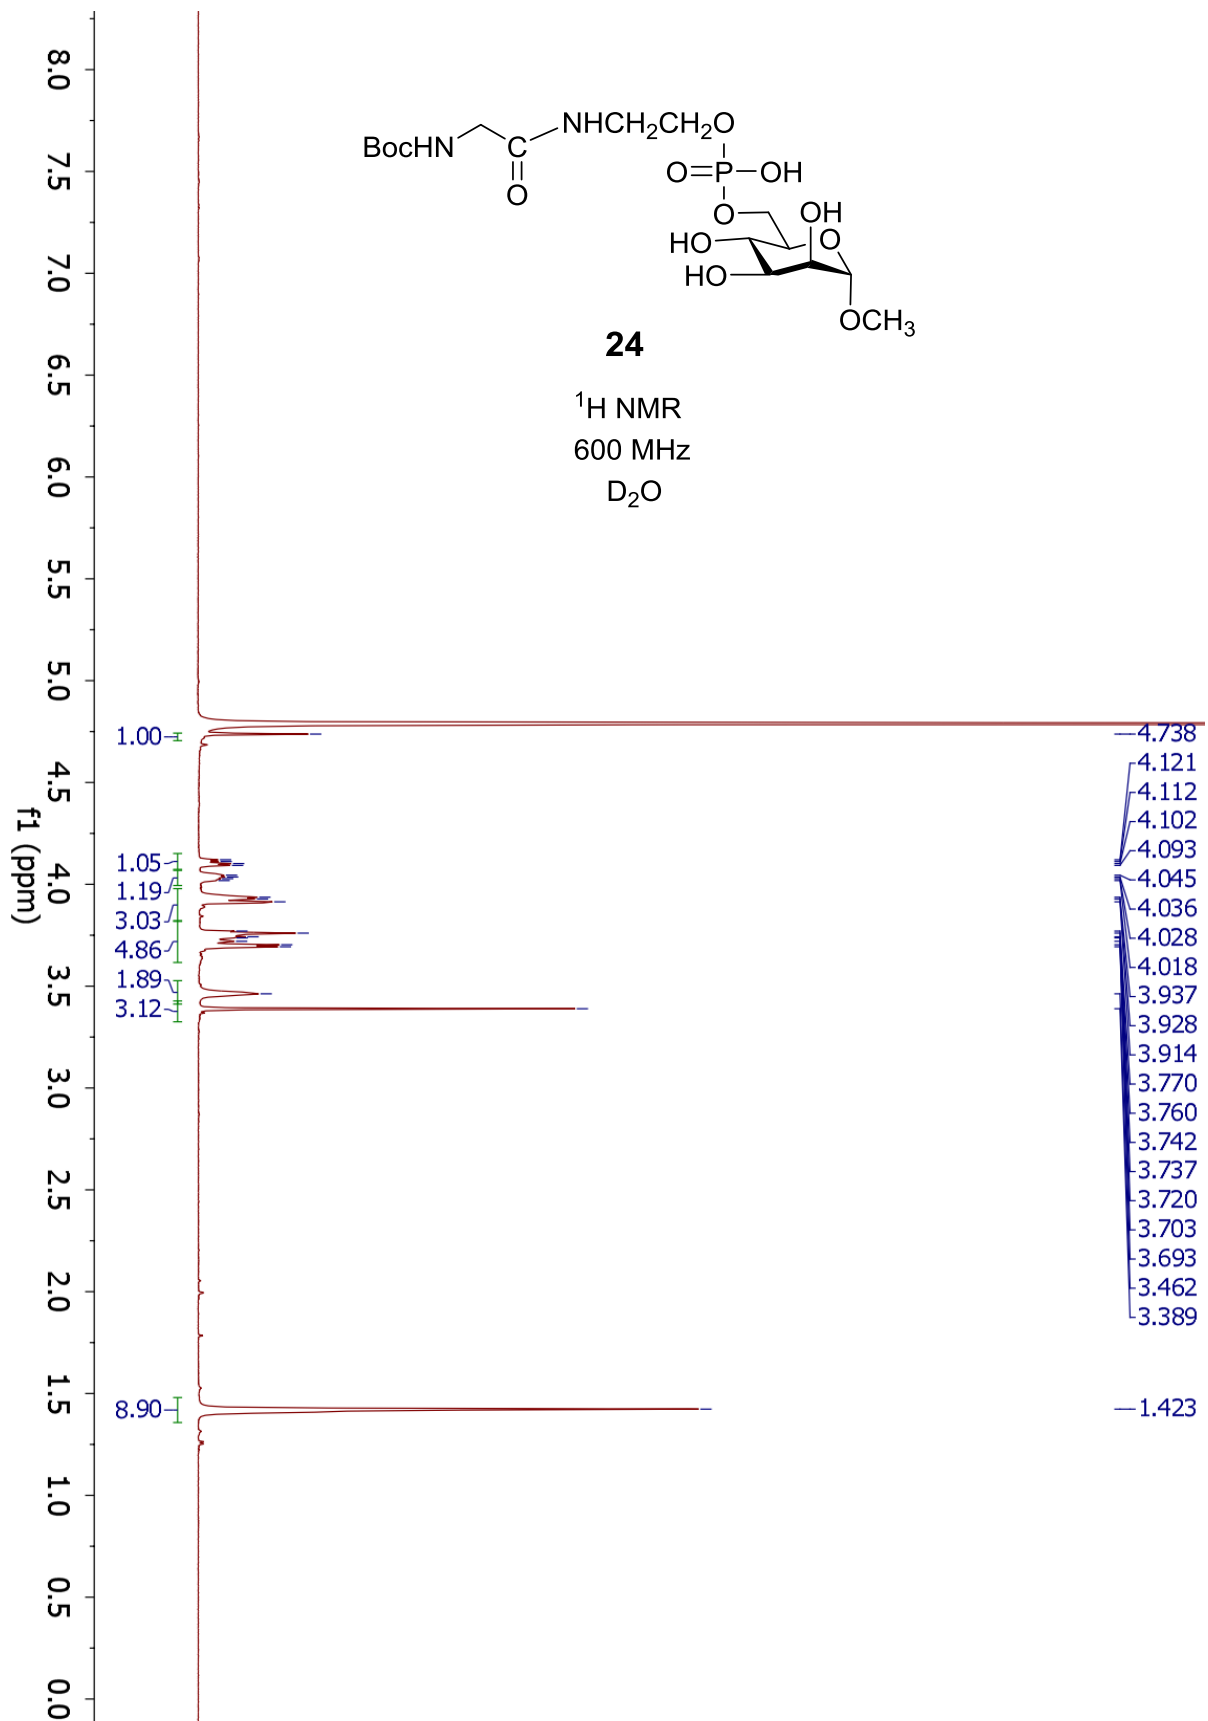

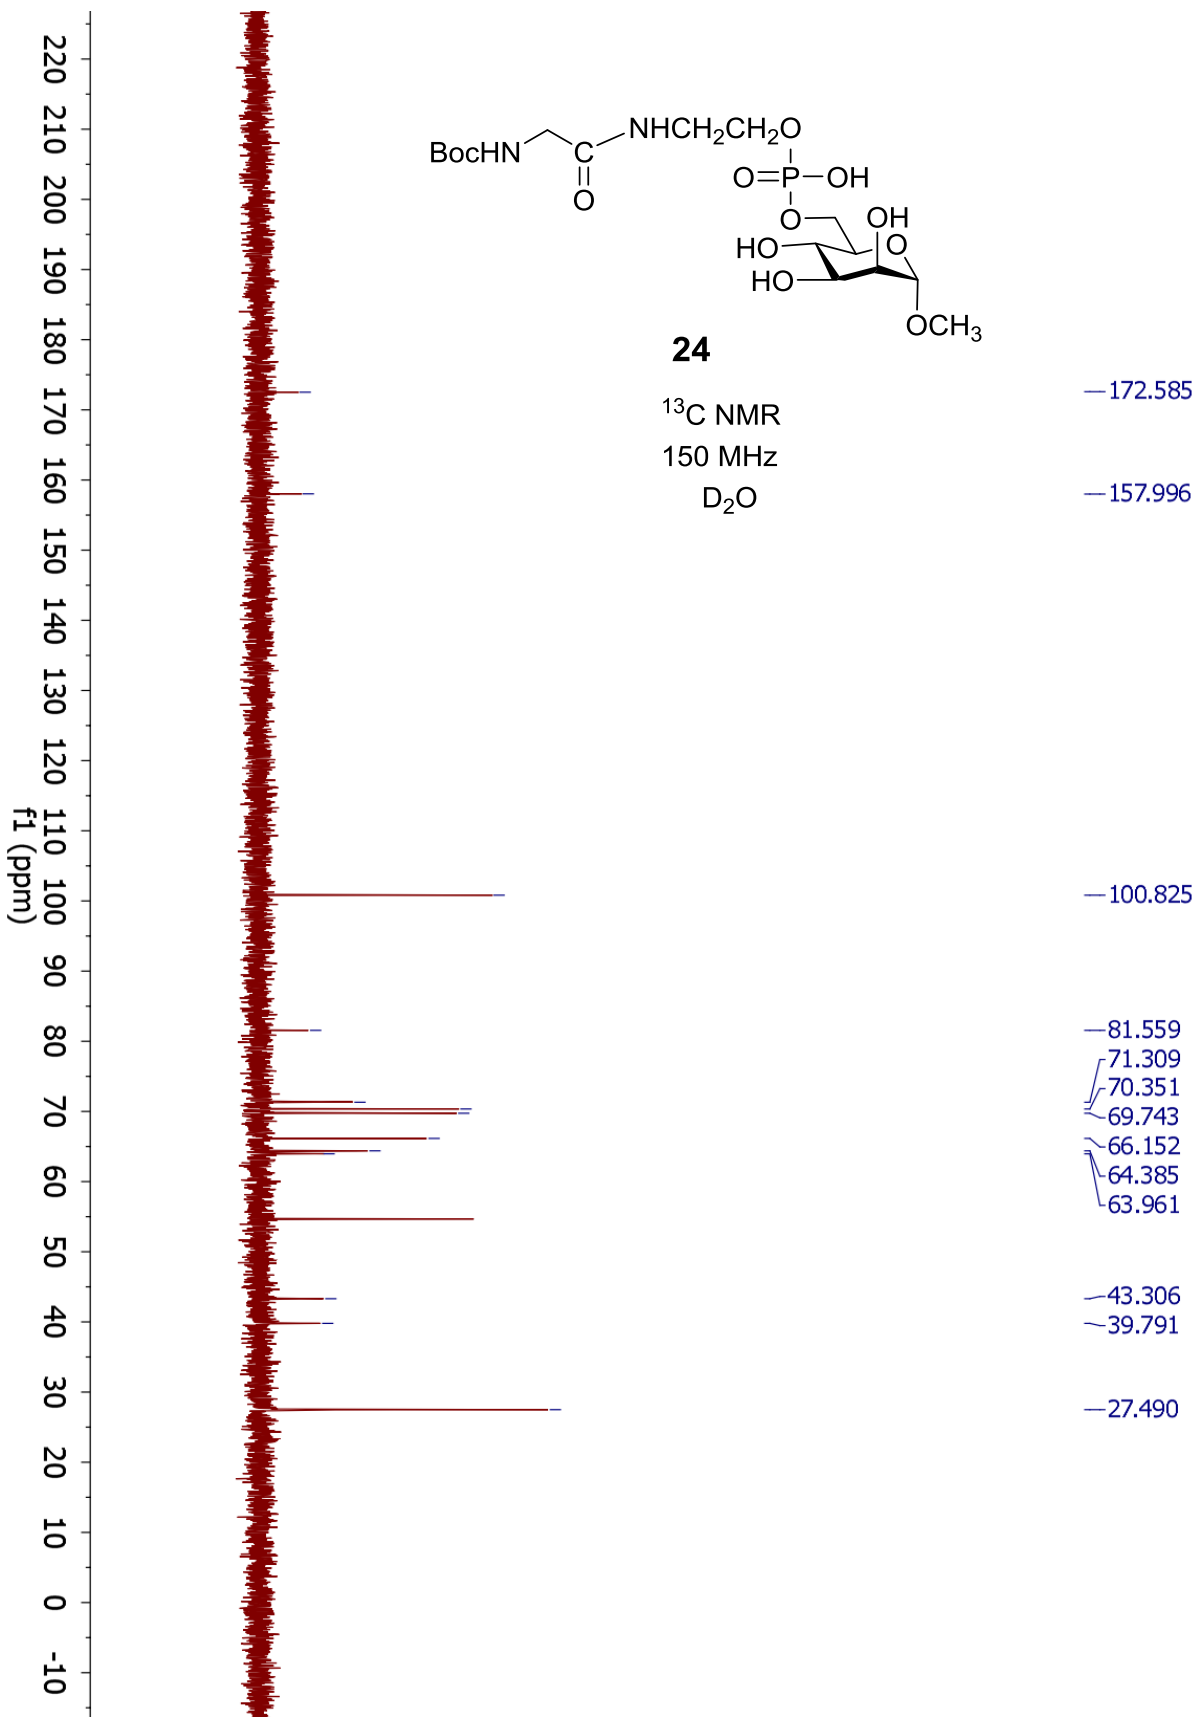

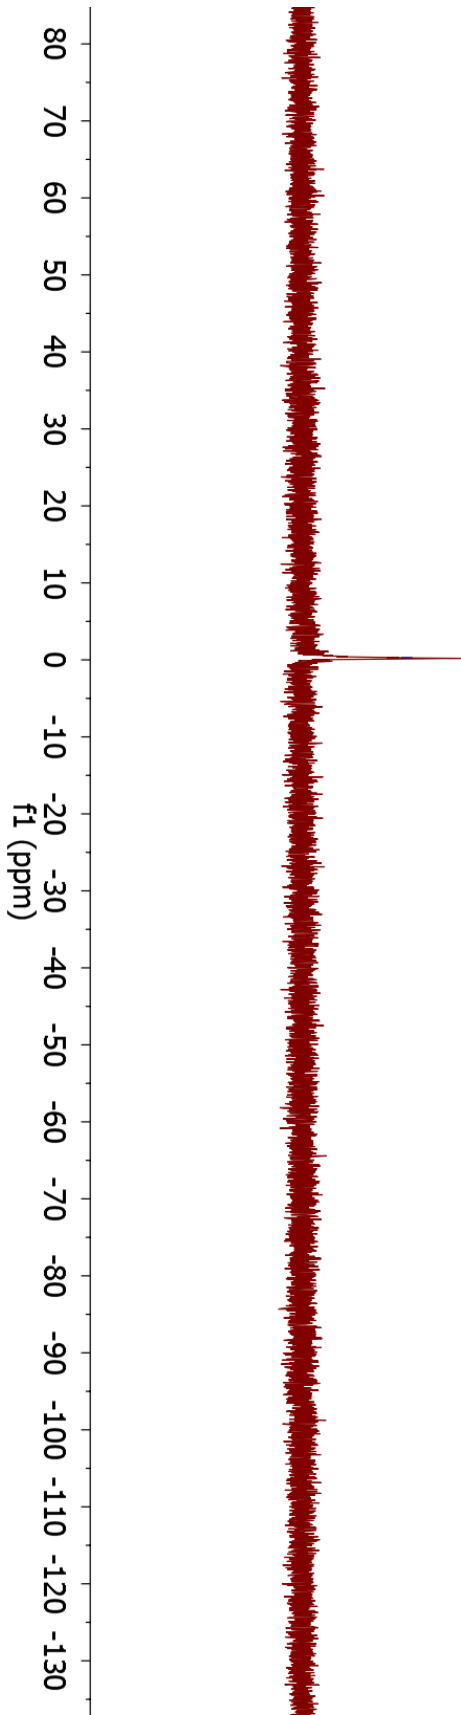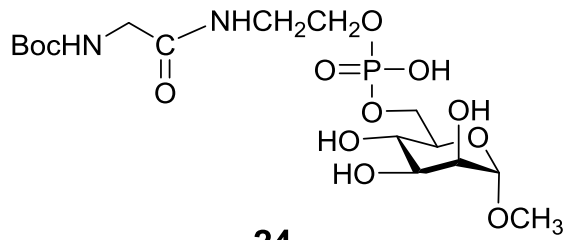

**24**

<sup>31</sup>P NMR  
160 MHz  
D<sub>2</sub>O

-0.287



Sample Name:

Data collected on:

a600-nmr600

Archive directory:

/home/vmr1/vmr5ys/probes/probe\_calibs

Sample directory:

Fidfile: gcosy

Pulse Sequence: gcosy

Solvent: d2o

Data collected on: Oct 21 2015

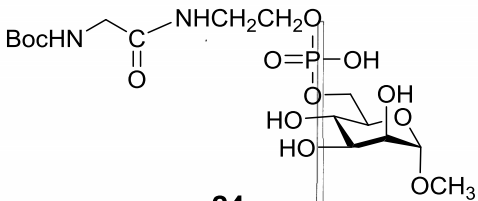

24

<sup>1</sup>H-<sup>1</sup>H COSY  
600 MHz  
D<sub>2</sub>O

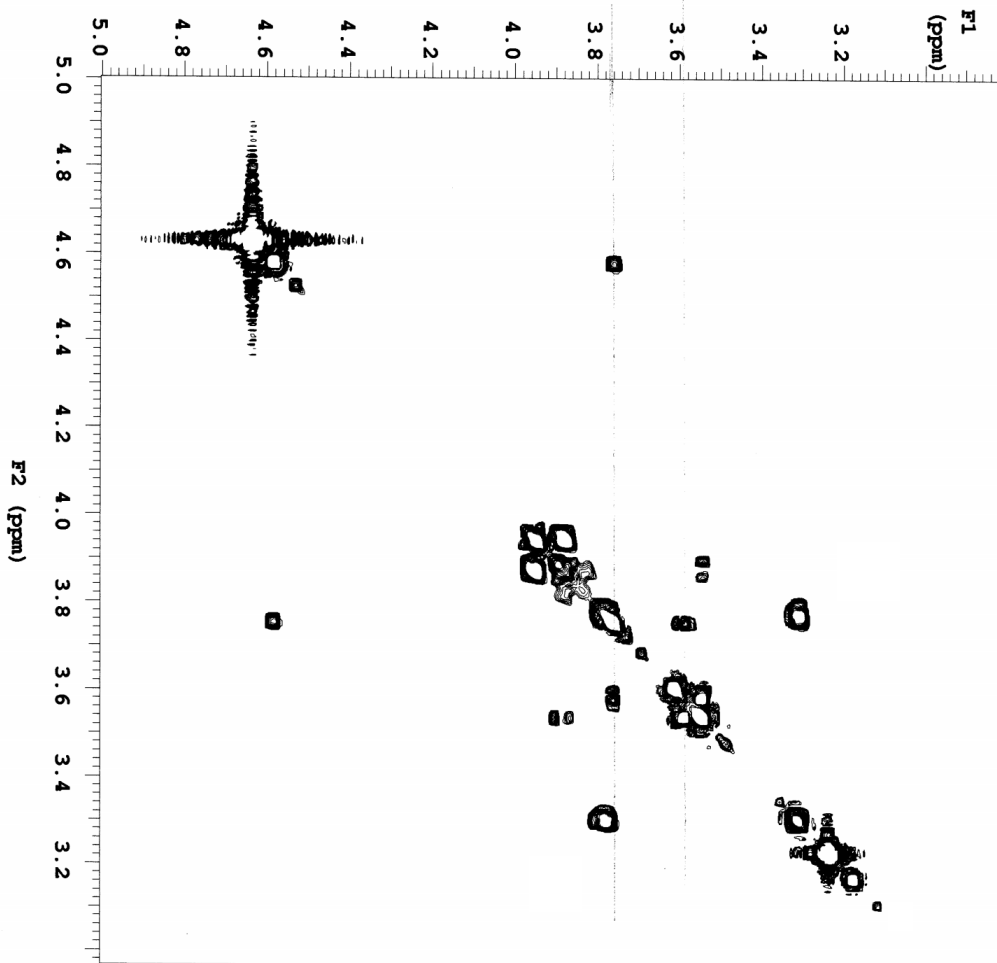

## Elemental Composition Report

### Single Mass Analysis

Tolerance = 5.0 PPM / DBE: min = -1.5, max = 100.0

Element prediction: Off

Number of isotope peaks used for i-FIT = 6

Monoisotopic Mass, Even Electron Ions

238 formula(e) evaluated with 1 results within limits (all results (up to 1000) for each mass)

Elements Used:

C: 16-16 H: 0-35 N: 0-5 O: 0-20 31P: 0-1

S.Zhu ZSY-1-136 inMeOH Cone(V)50

LCT Premier KD128

TOF MS ES-

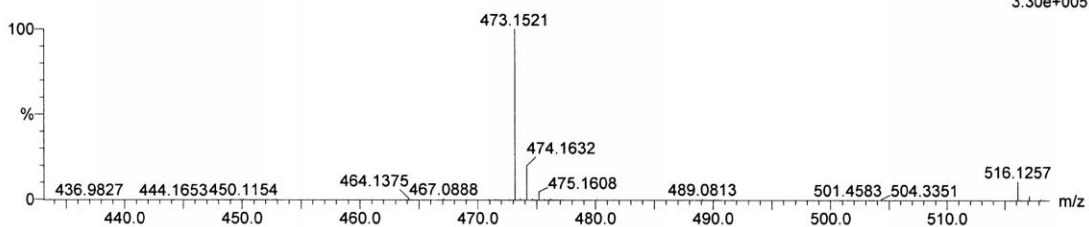

Minimum:

Maximum: 3.0 5.0 -1.5 100.0

| Mass     | Calc. Mass | mDa  | PPM  | DBE | i-FIT | i-FIT (Norm) | Formula            |
|----------|------------|------|------|-----|-------|--------------|--------------------|
| 473.1521 | 473.1536   | -1.5 | -3.2 | 3.5 | 125.1 | 0.0          | C16 H30 N2 O12 31P |

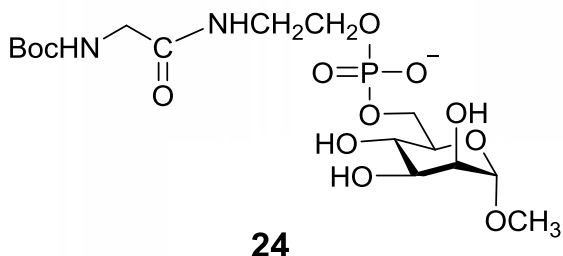

**24**

Chemical Formula: C<sub>16</sub>H<sub>30</sub>N<sub>2</sub>O<sub>12</sub>P<sup>-</sup>

Exact Mass: 473.1542

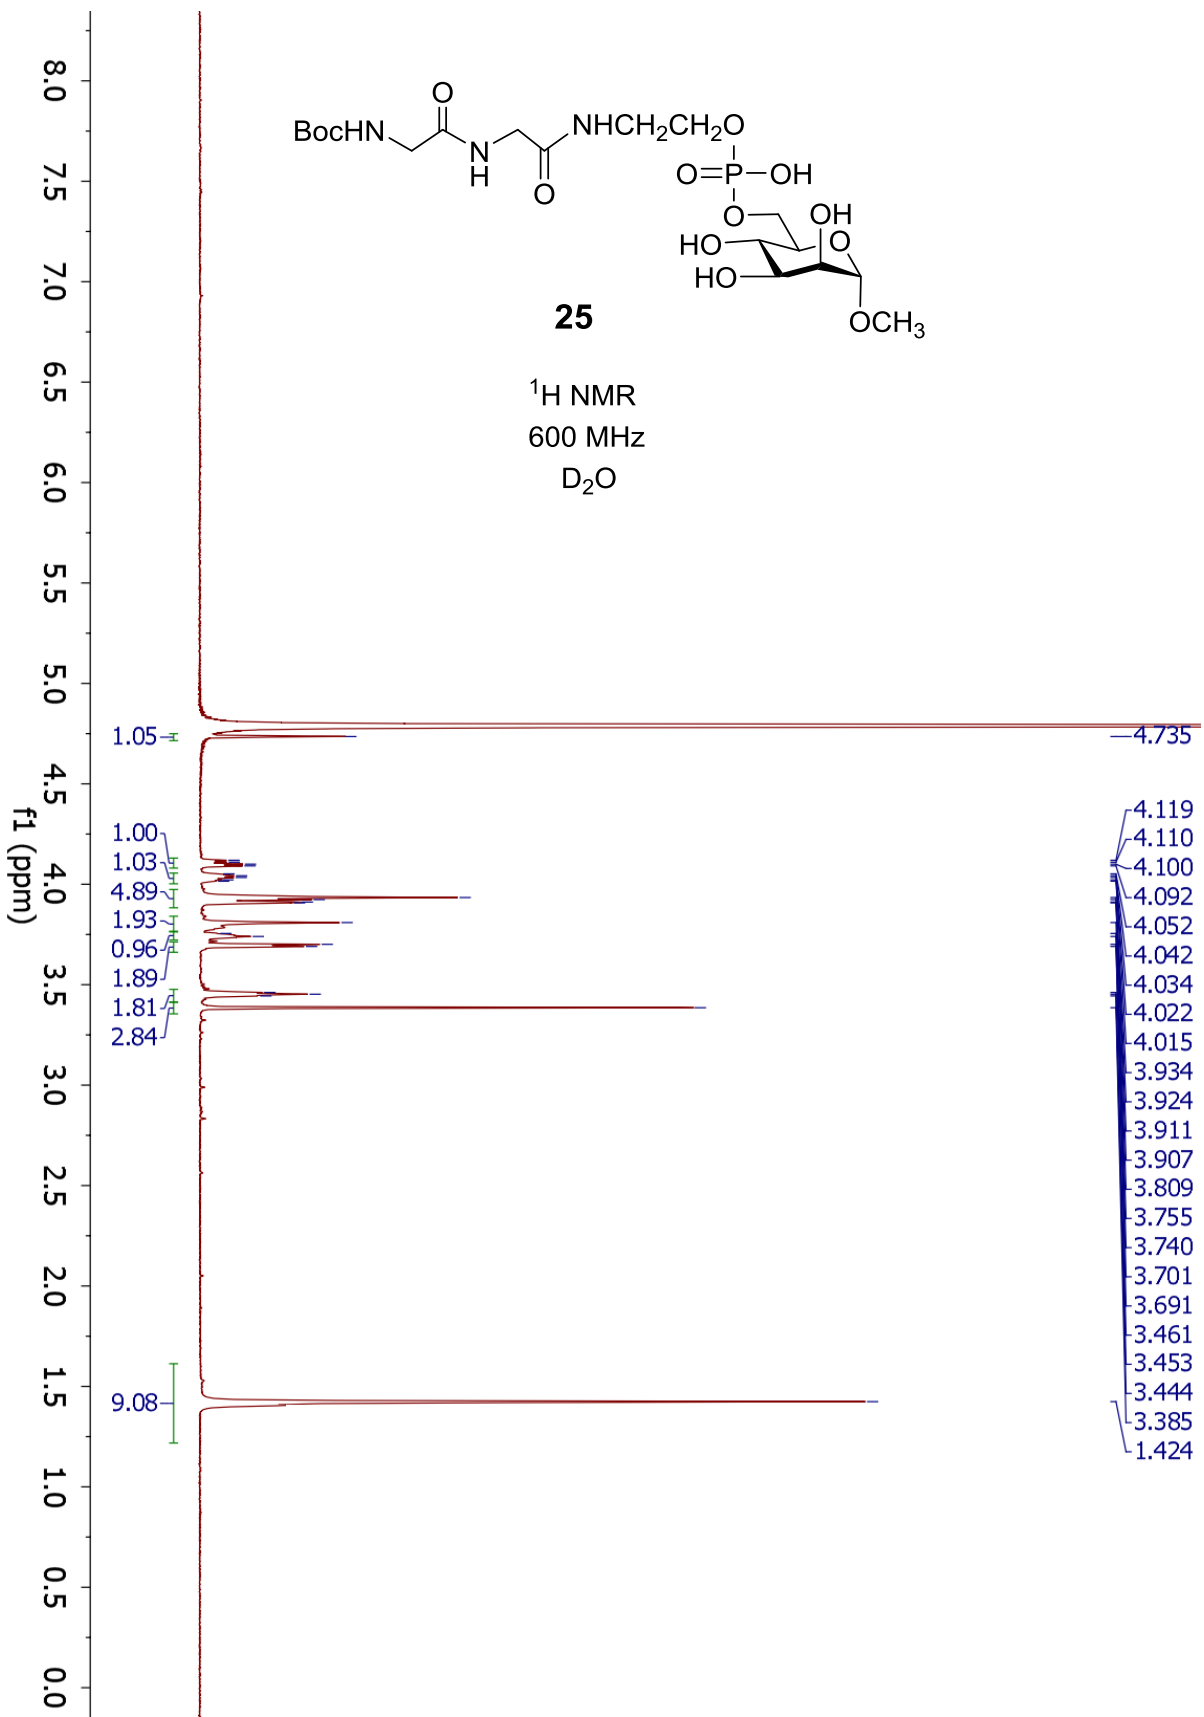

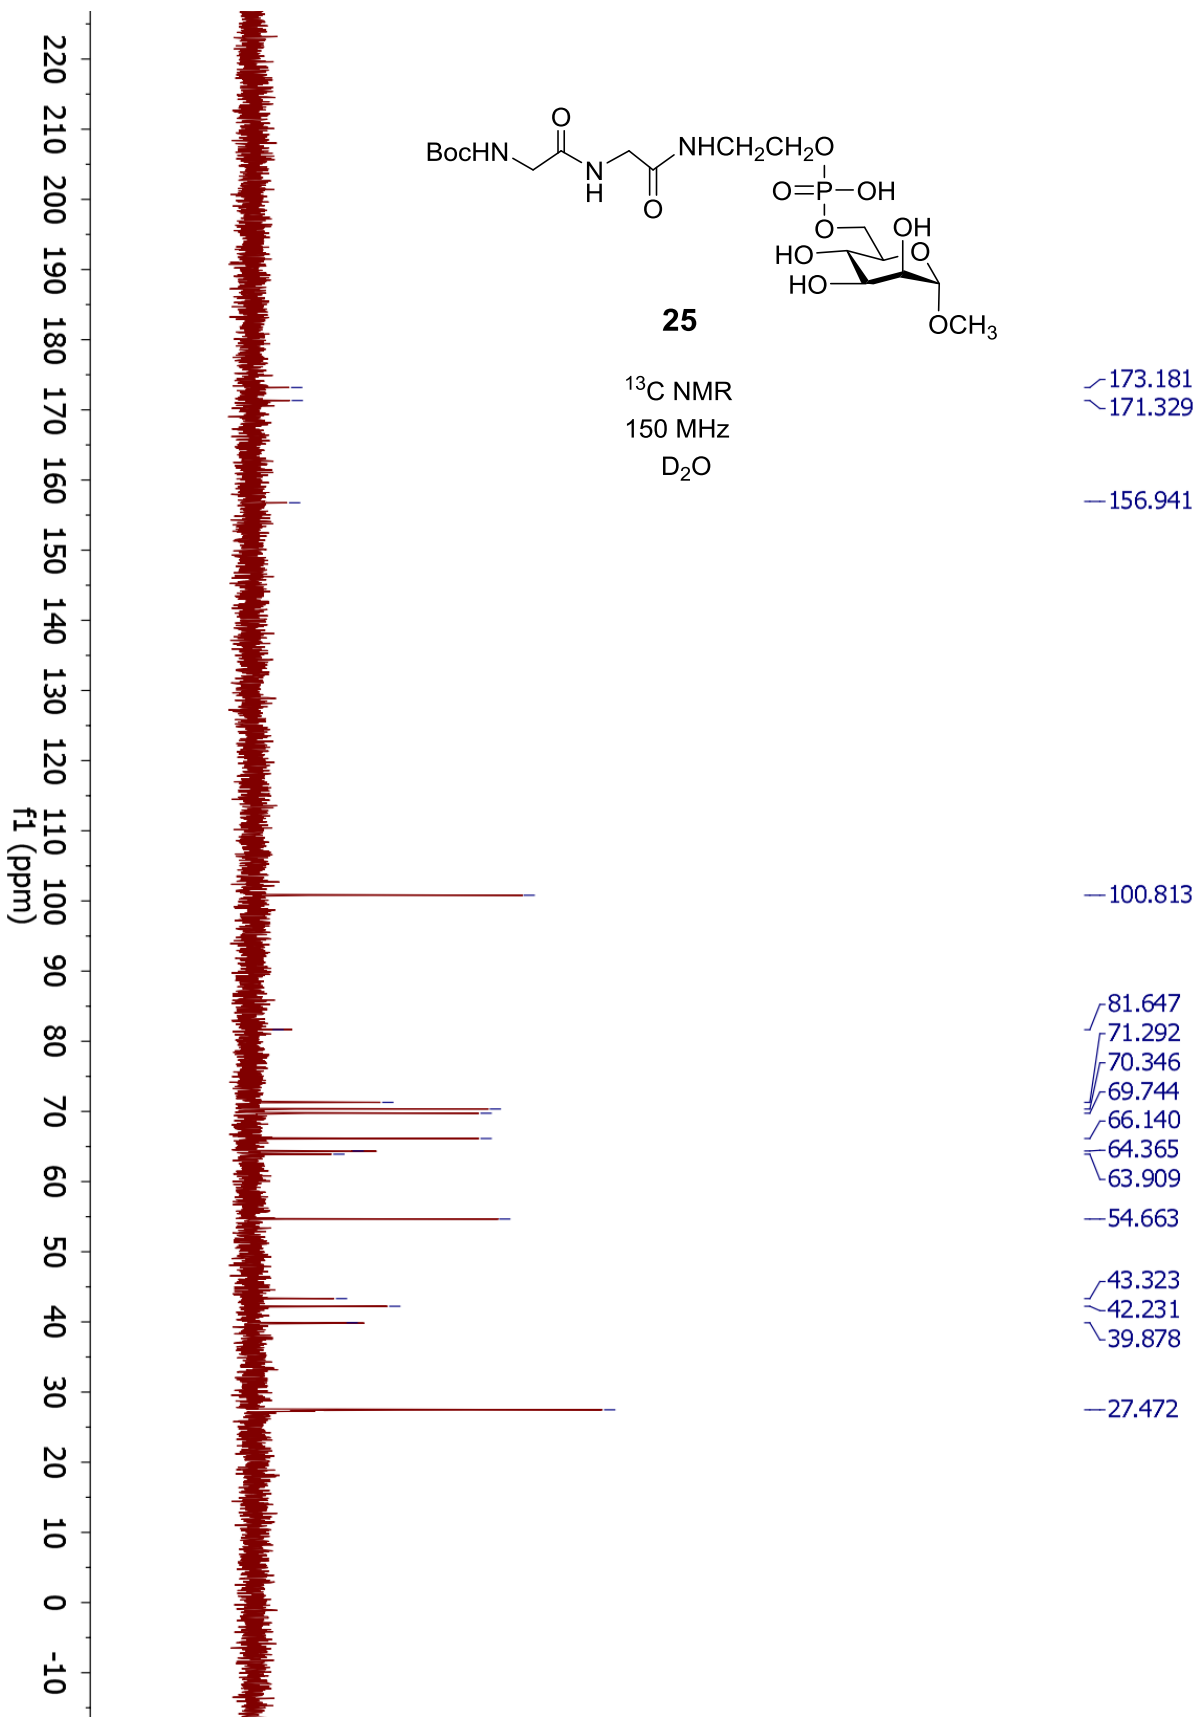

Sample Name:

Data Collected on:

600-nmr600

Archive directory:

/home/vmml/vmrmsys/probes/probe\_calibs

Sample directory:

F1F1file: rzy-1-139-cosy-D20

Pulse Sequence: COSY

Solvent: d2o

Data collected on: Oct 26 2015

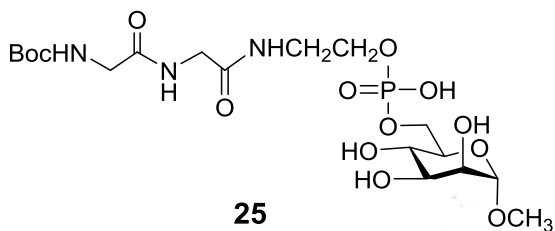

25

<sup>1</sup>H-<sup>1</sup>H COSY  
600 MHz  
D<sub>2</sub>O

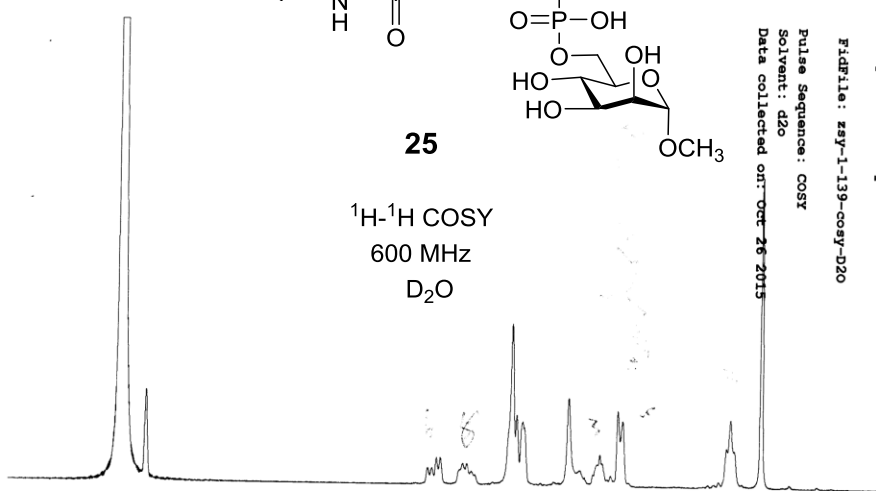

Agilent 600 NMR spectrometer

Agilent Technologies

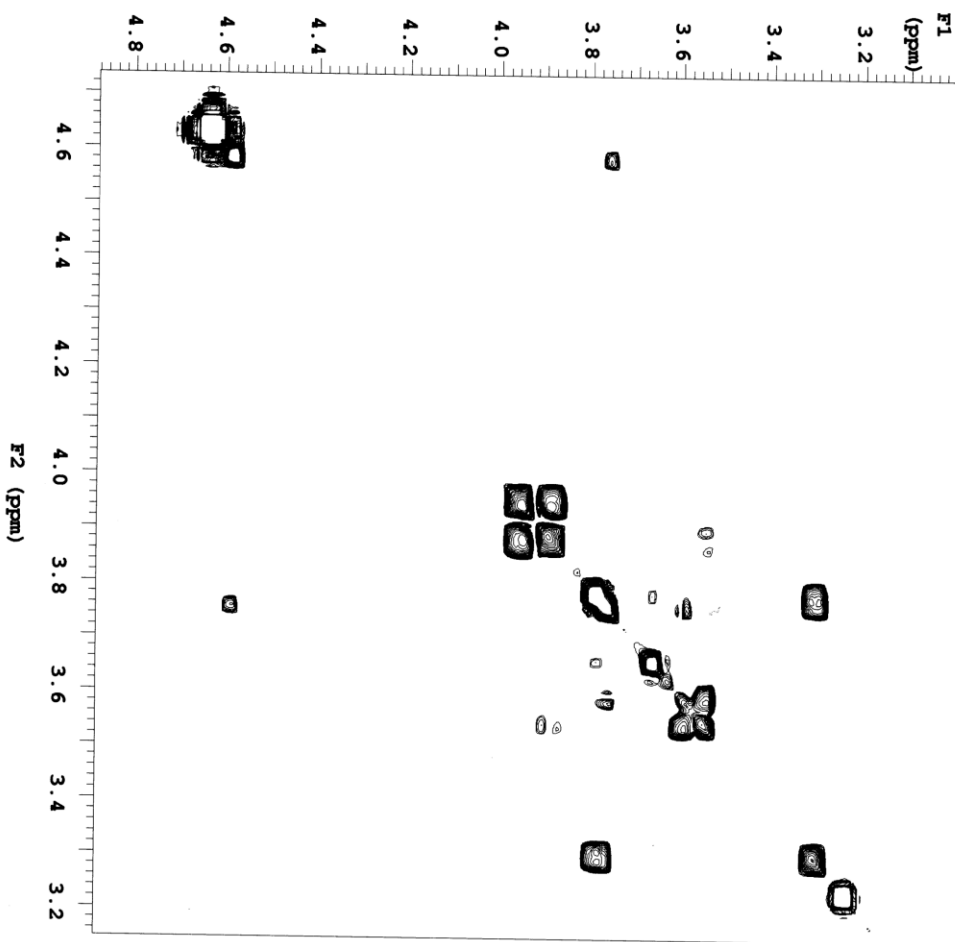

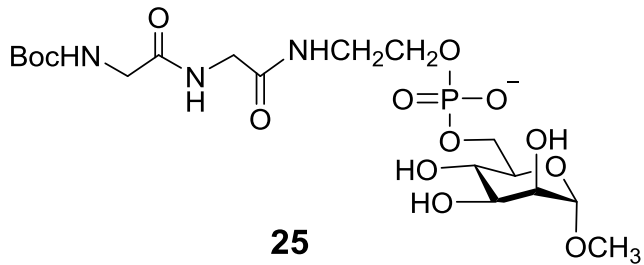

Chemical Formula:  $C_{18}H_{33}N_3O_{13}P^-$   
 Exact Mass: 530.1756

### Elemental Composition Report

#### Single Mass Analysis

Tolerance = 10.0 PPM / DBE: min = -1.5, max = 100.0

Element prediction: Off

Number of isotope peaks used for i-FIT = 6

Monoisotopic Mass, Even Electron Ions

182 formula(e) evaluated with 1 results within limits (all results (up to 1000) for each mass)

Elements Used:

C: 18-18 H: 0-40 N: 0-5 O: 0-15 31P: 0-1

LCT Premier KD128

TOF MS ES-

S.Zhu ZSY-1-139 in MeOH Cone(V)50

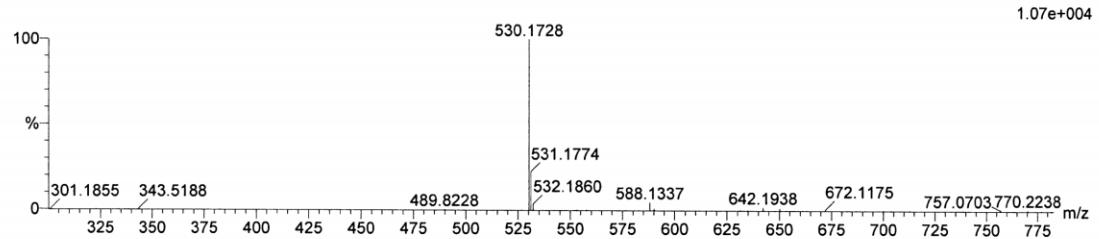

Minimum: -1.5  
 Maximum: 3.0 10.0 100.0

| Mass     | Calc. Mass | mDa  | PPM  | DBE | i-FIT | i-FIT (Norm) | Formula               |
|----------|------------|------|------|-----|-------|--------------|-----------------------|
| 530.1728 | 530.1751   | -2.3 | -4.3 | 4.5 | 38.2  | 0.0          | C18 H33 N3 O13<br>31P |

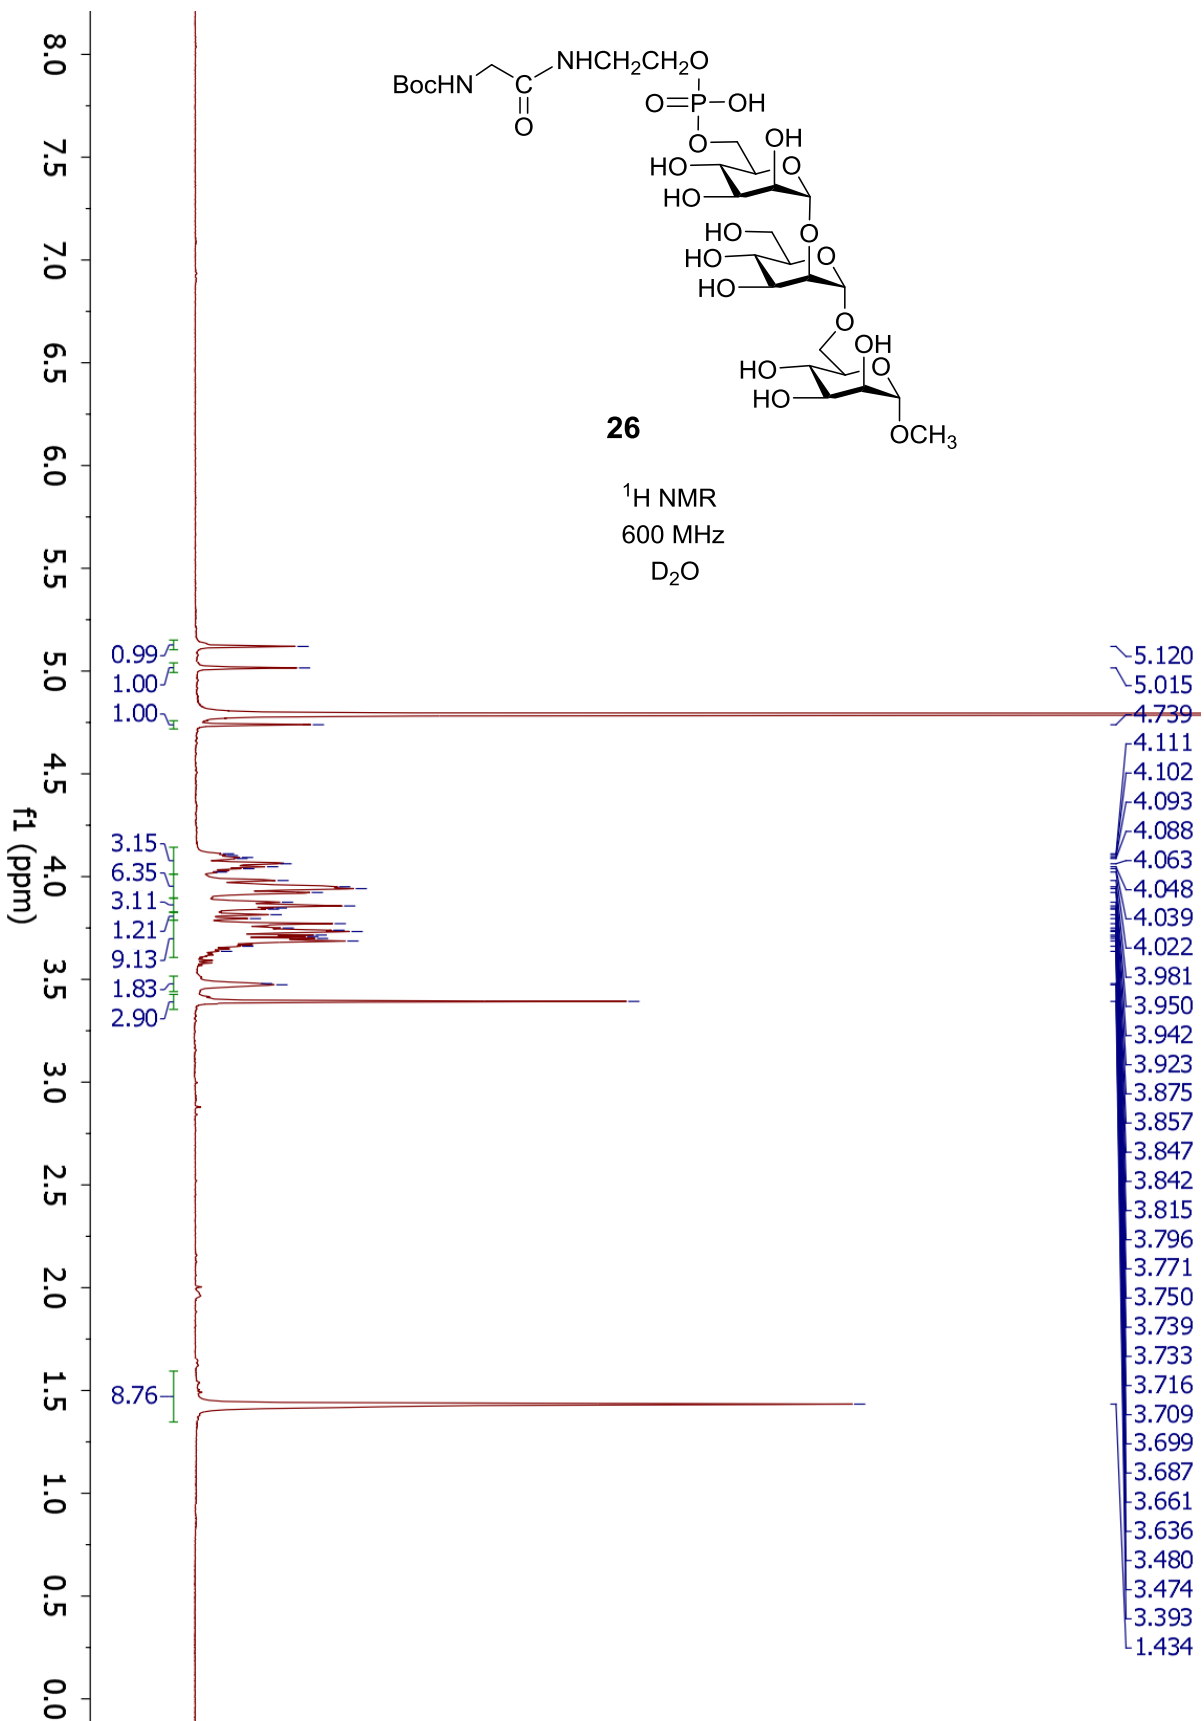





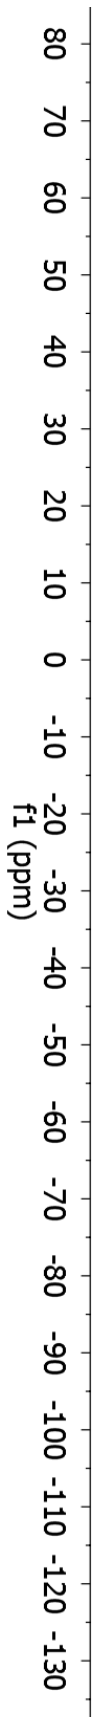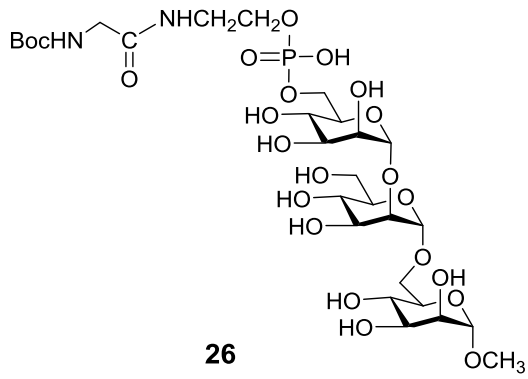

**26**

<sup>31</sup>P NMR  
160 MHz  
D<sub>2</sub>O

-0.504

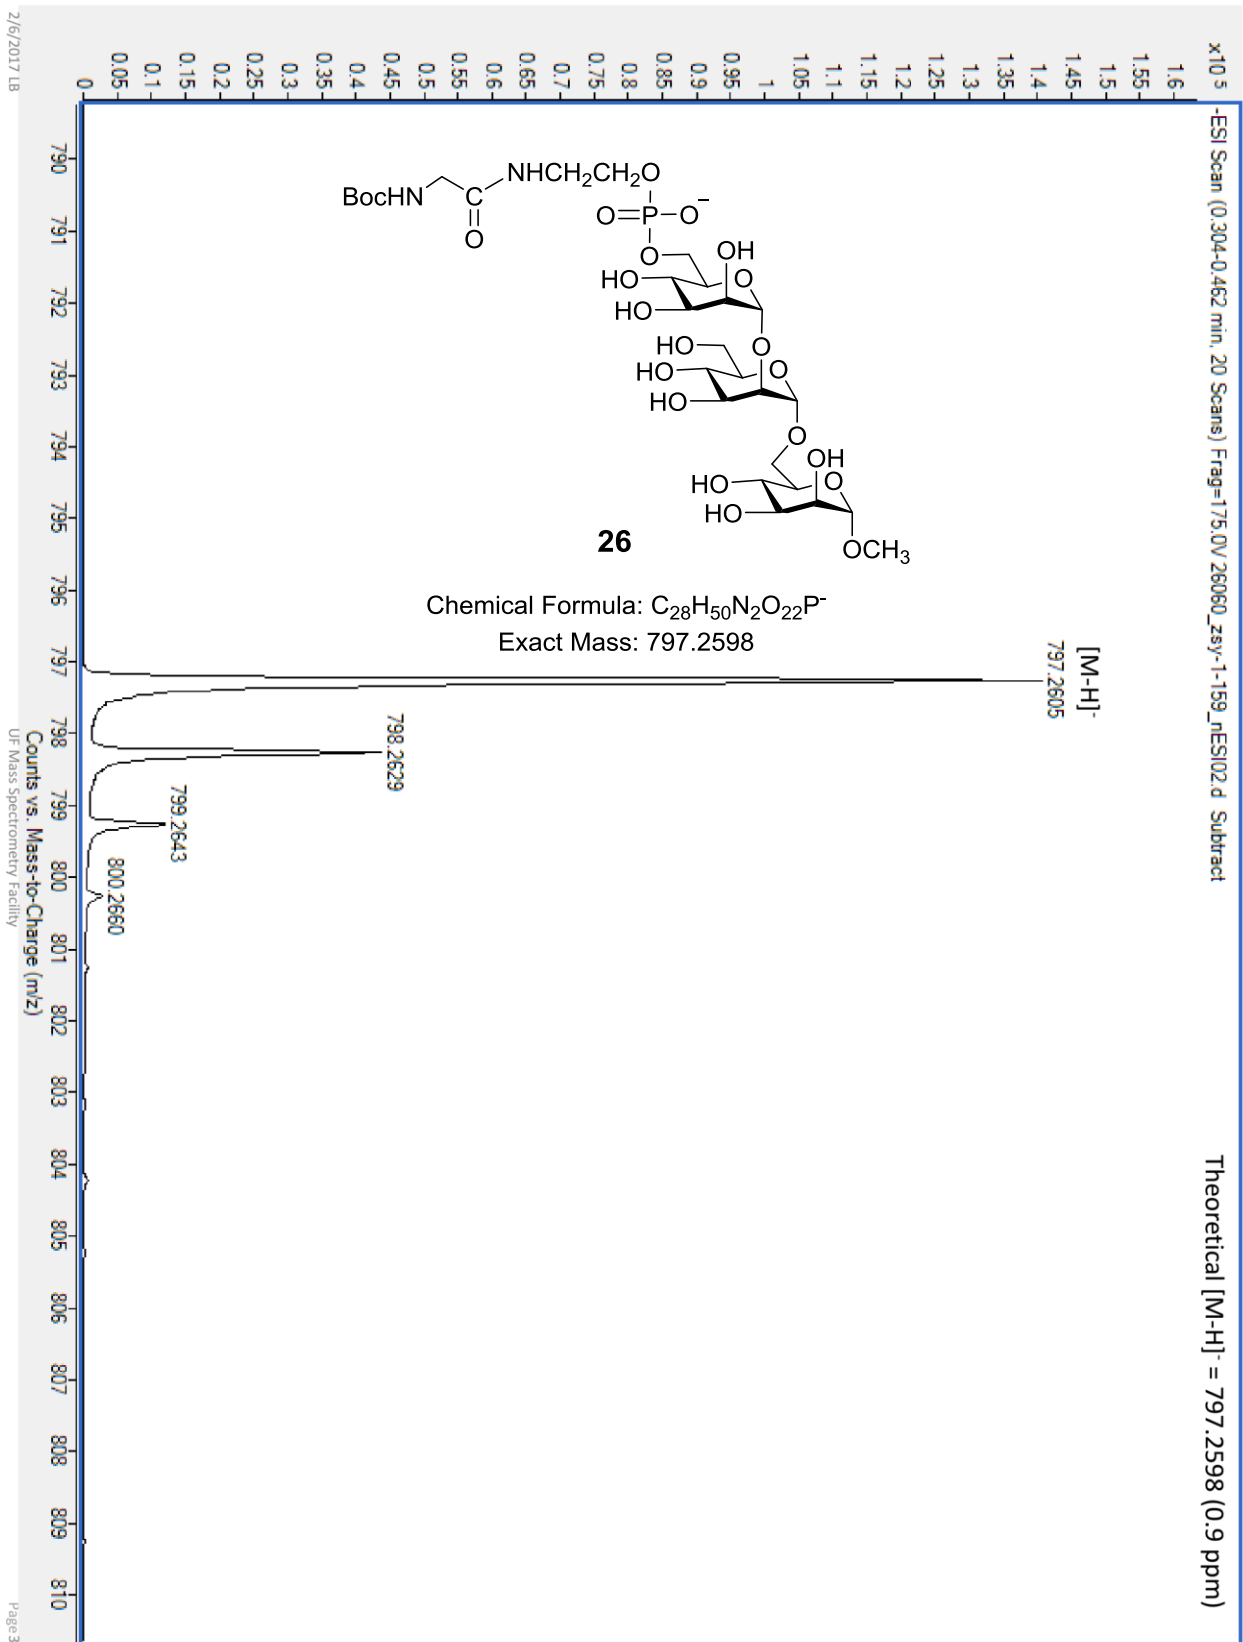

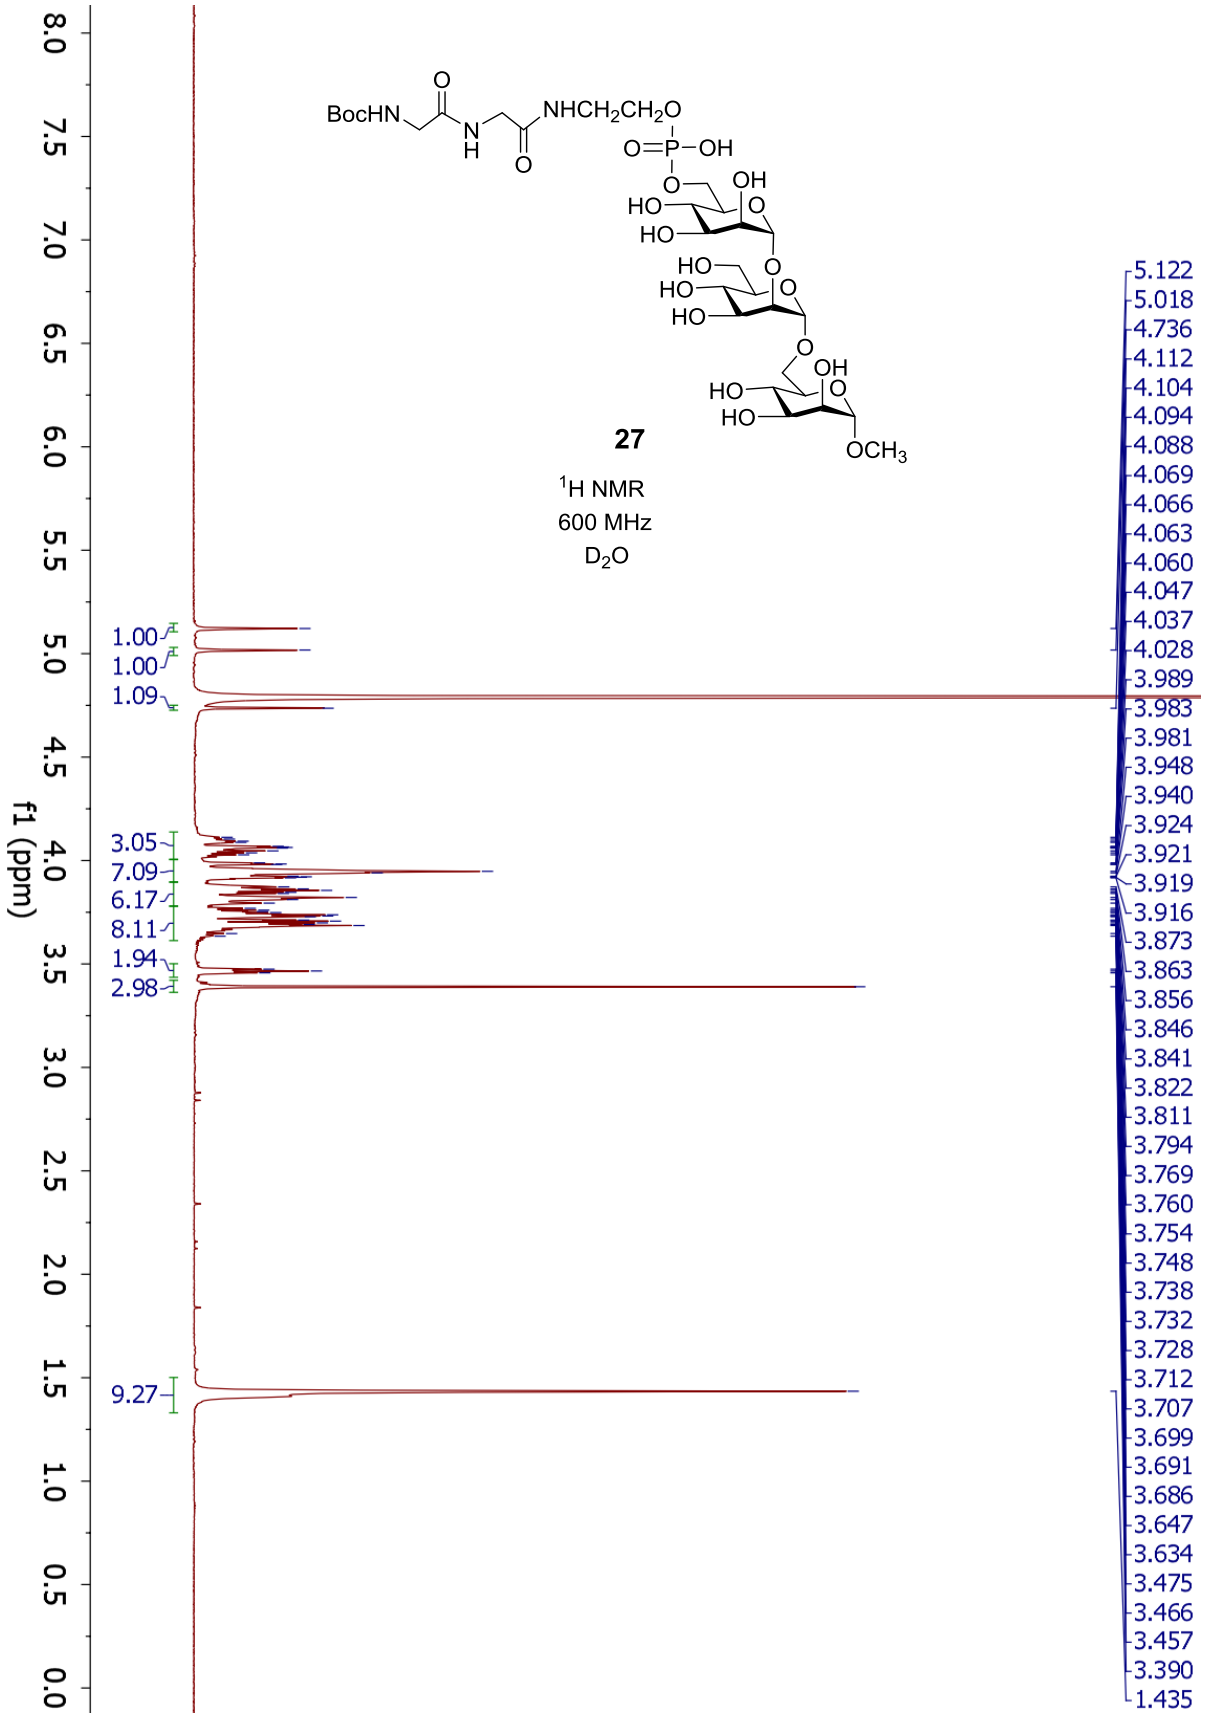

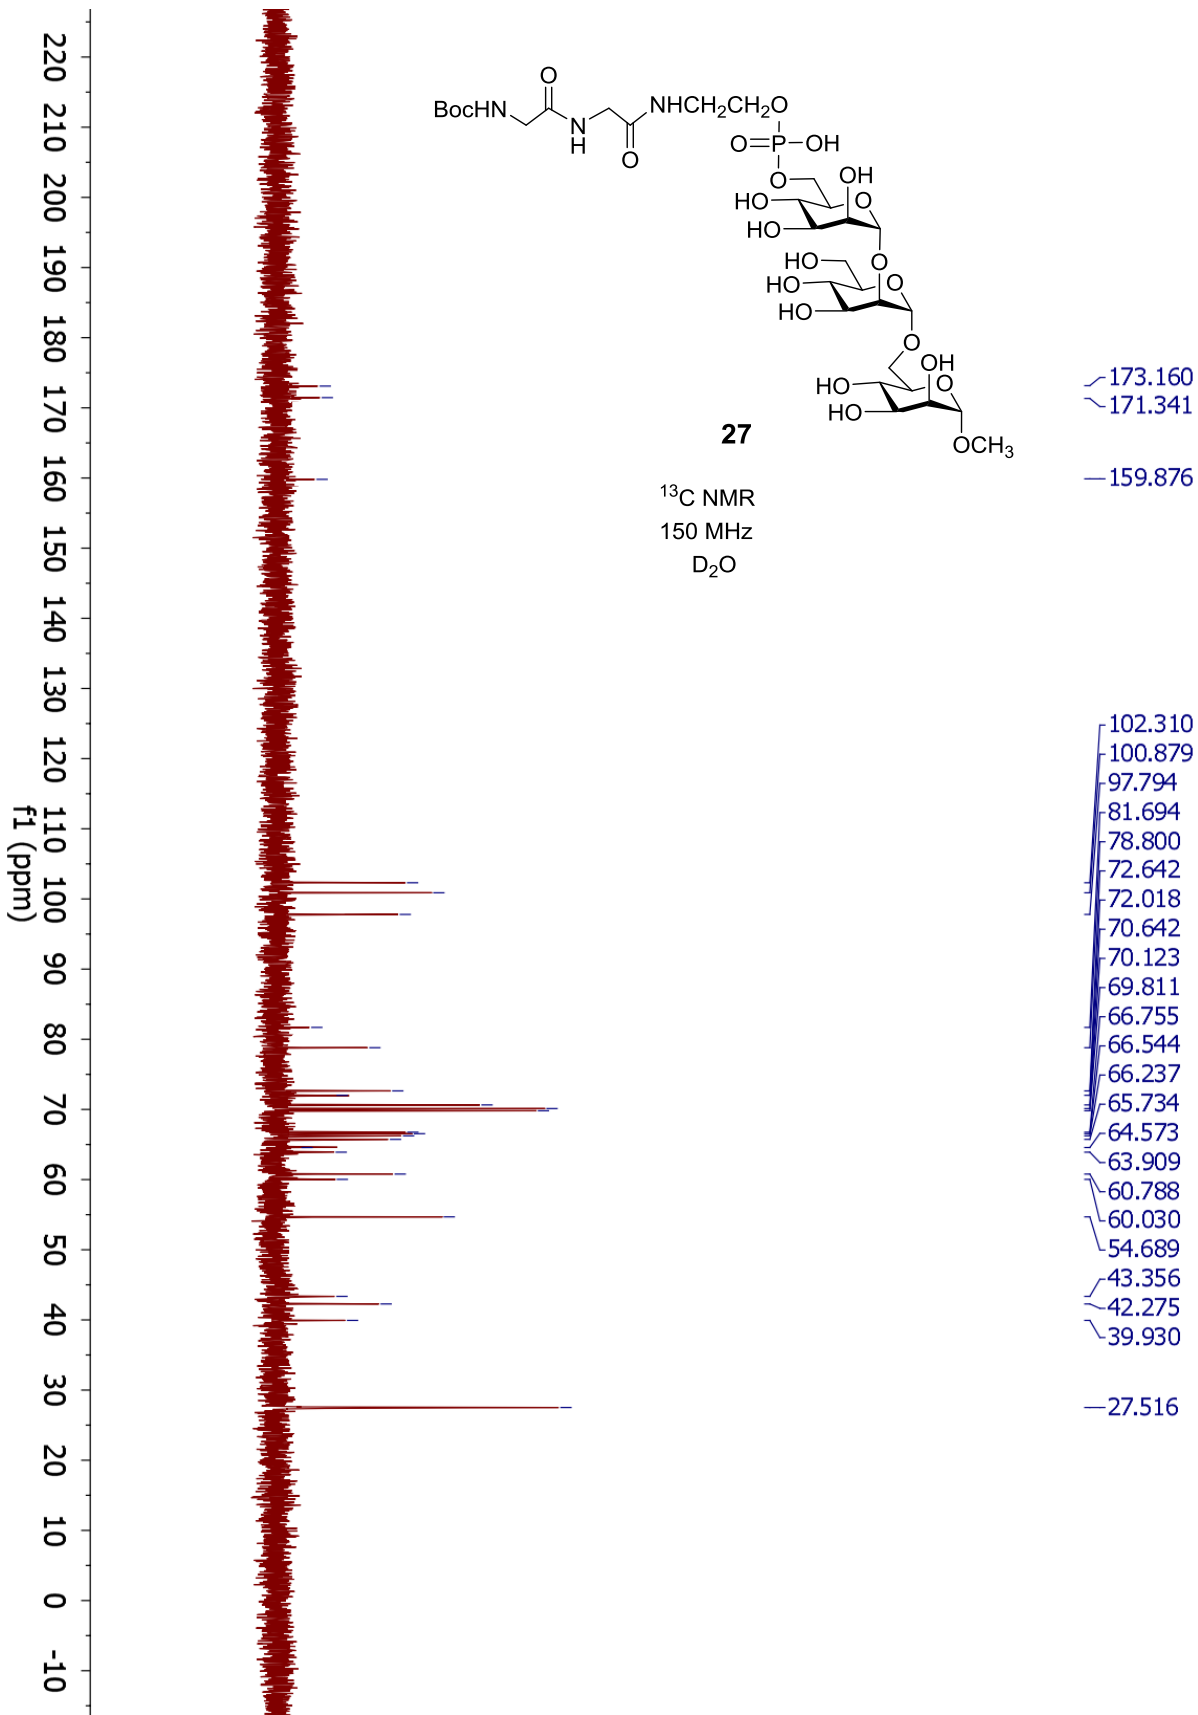

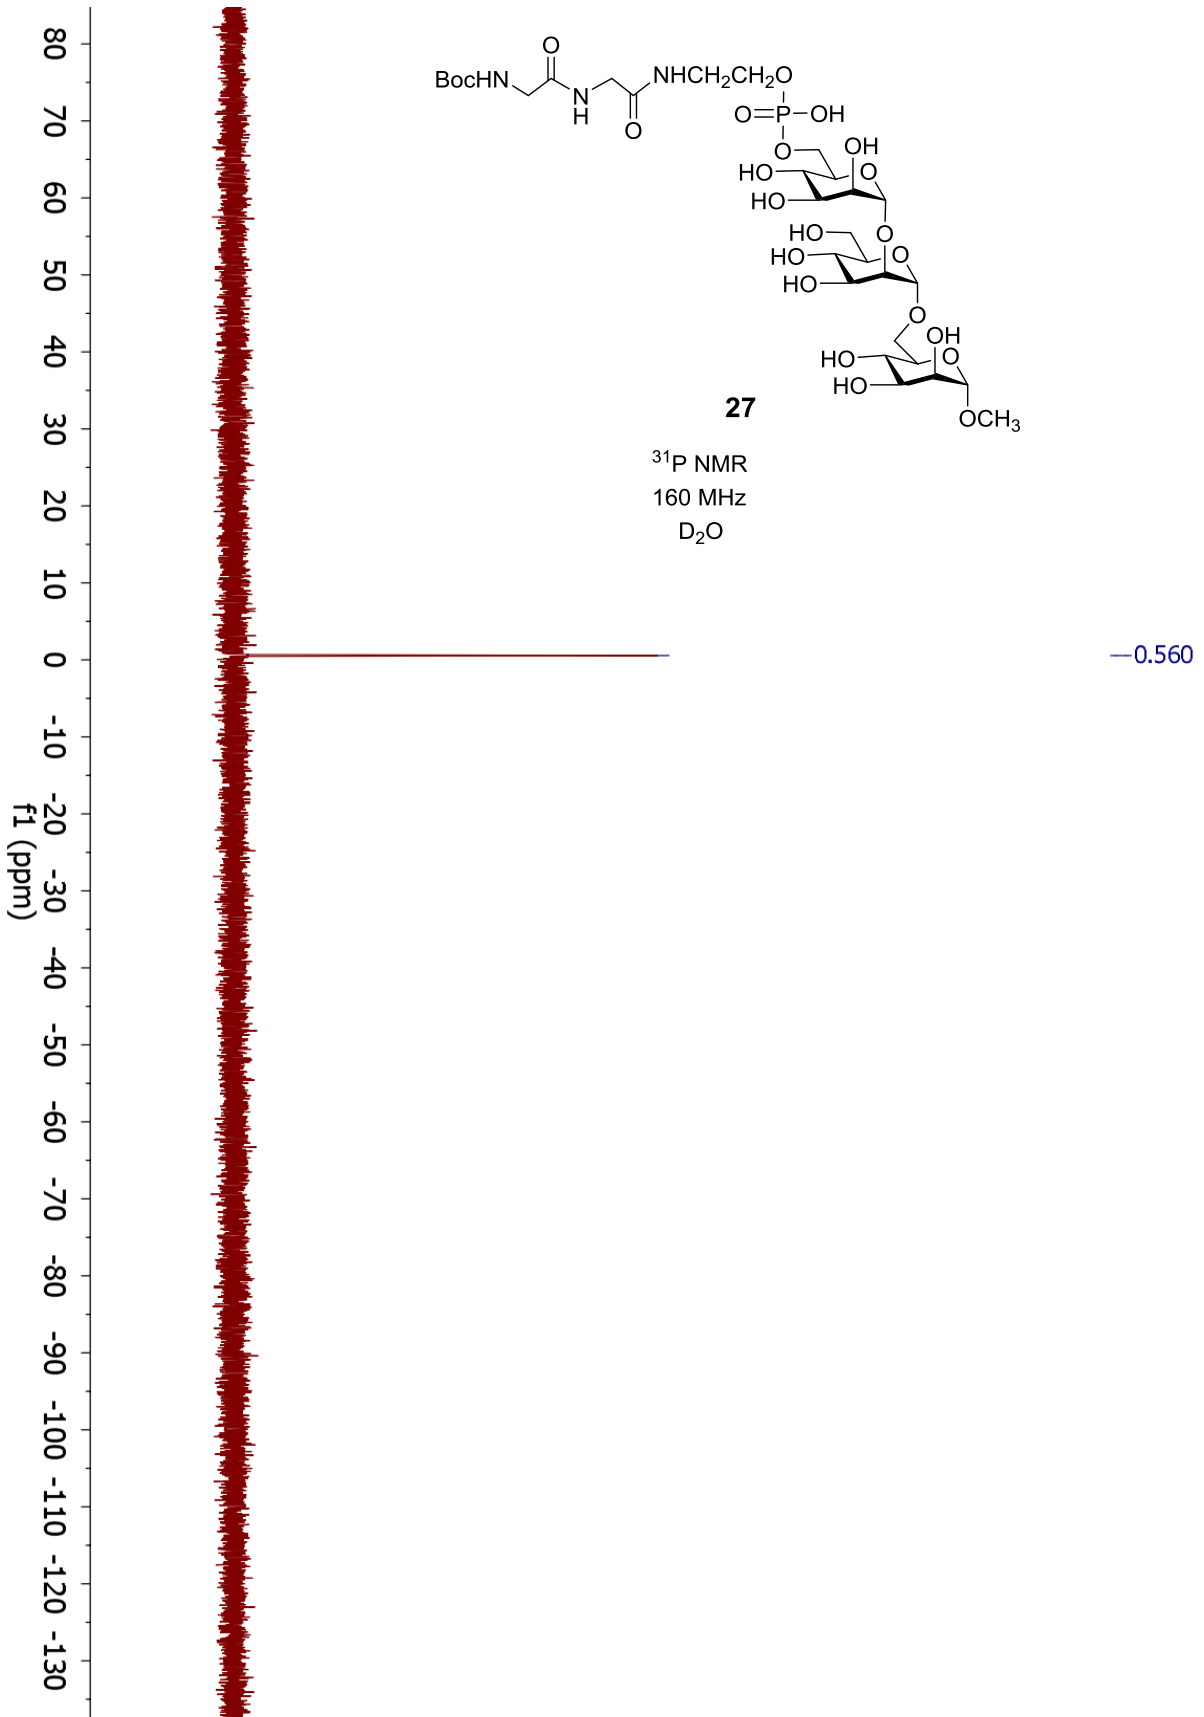

|    |         |         |      |
|----|---------|---------|------|
| 1  | 15431.2 | 102.321 | 15.6 |
| 2  | 15215.2 | 100.889 | 18.9 |
| 3  | 14750.2 | 97.805  | 14.8 |
| 4  | 10956.3 | 72.648  | 13.8 |
| 5  | 10652.2 | 70.632  | 24.0 |
| 6  | 10576.5 | 70.130  | 32.7 |
| 7  | 10529.3 | 69.818  | 32.1 |
| 8  | 10068.2 | 66.760  | 15.5 |
| 9  | 10036.8 | 66.552  | 15.6 |
| 10 | 9990.2  | 66.243  | 15.5 |
| 11 | 9914.5  | 65.741  | 13.8 |
| 12 | 9168.4  | 60.793  | 14.3 |
| 13 | 8248.4  | 54.693  | 20.3 |
| 14 | 6376.4  | 42.280  | 12.5 |
| 15 | 4149.8  | 27.516  | 34.1 |

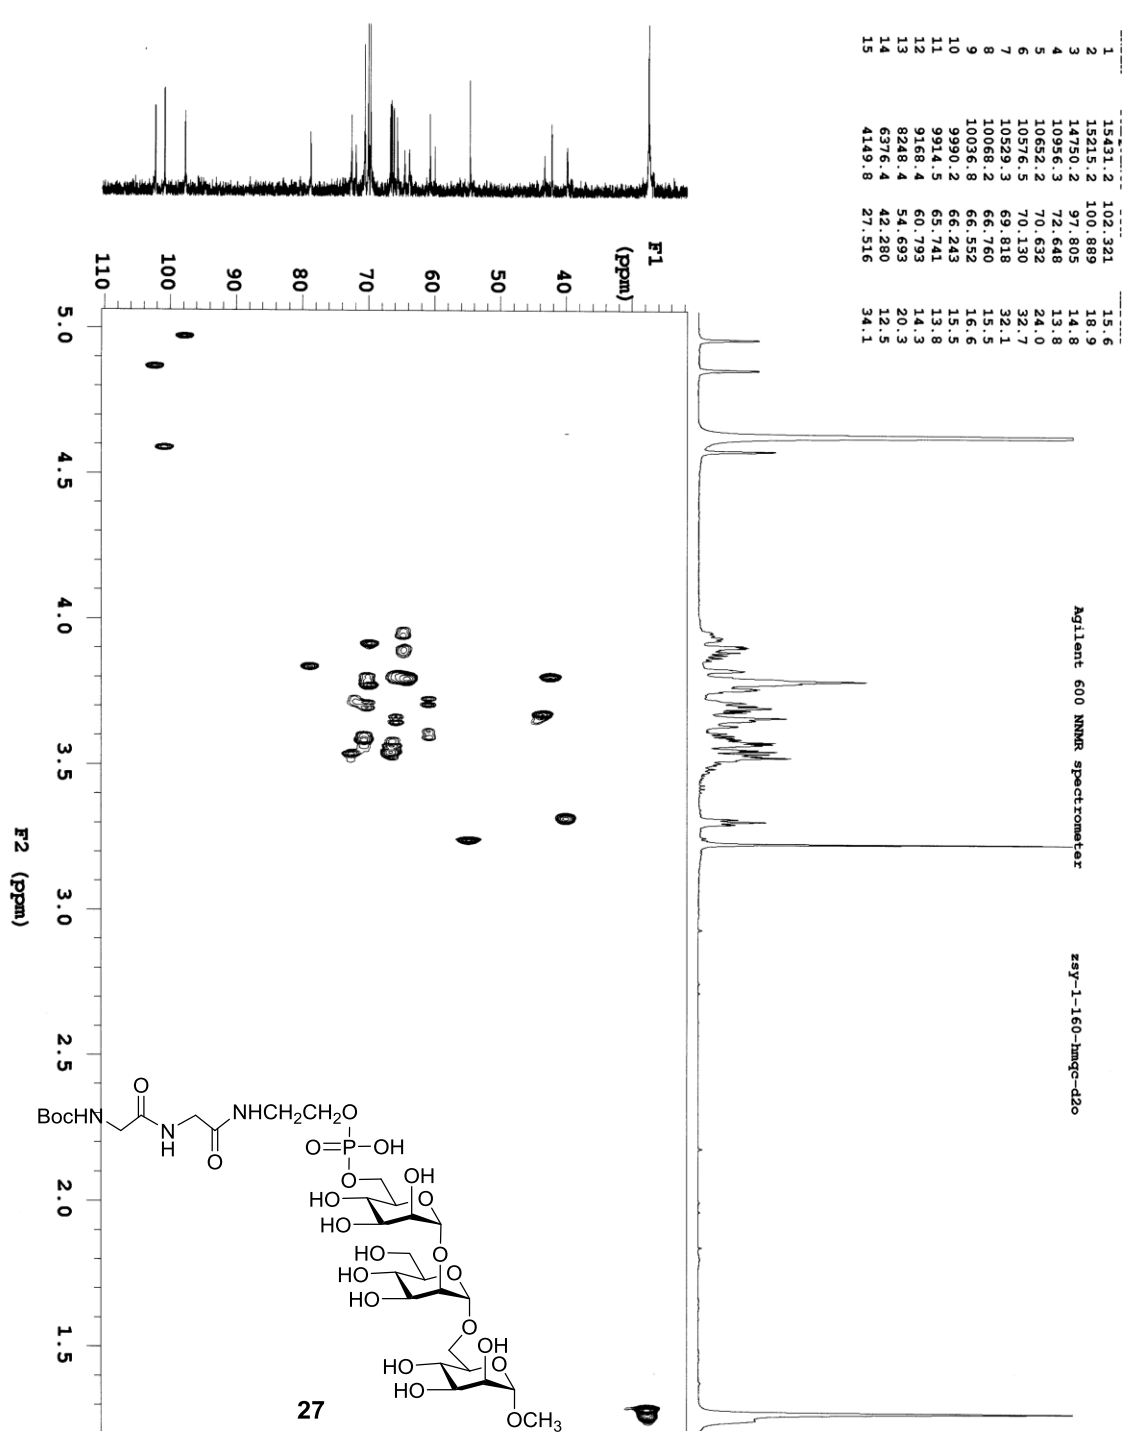

Agilent 600 NMR spectrometer  
 zxy-1-160-1mqc-d2o

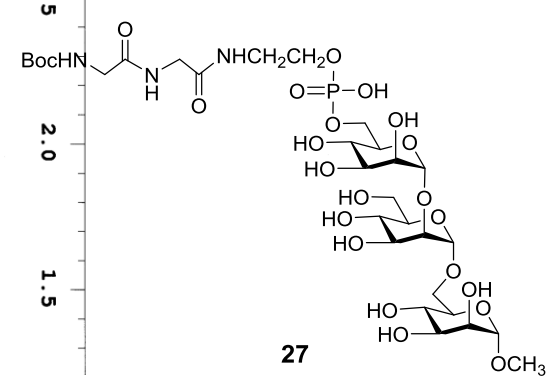

<sup>1</sup>H-<sup>13</sup>C HMQC  
 600/150 MHz  
 D<sub>2</sub>O

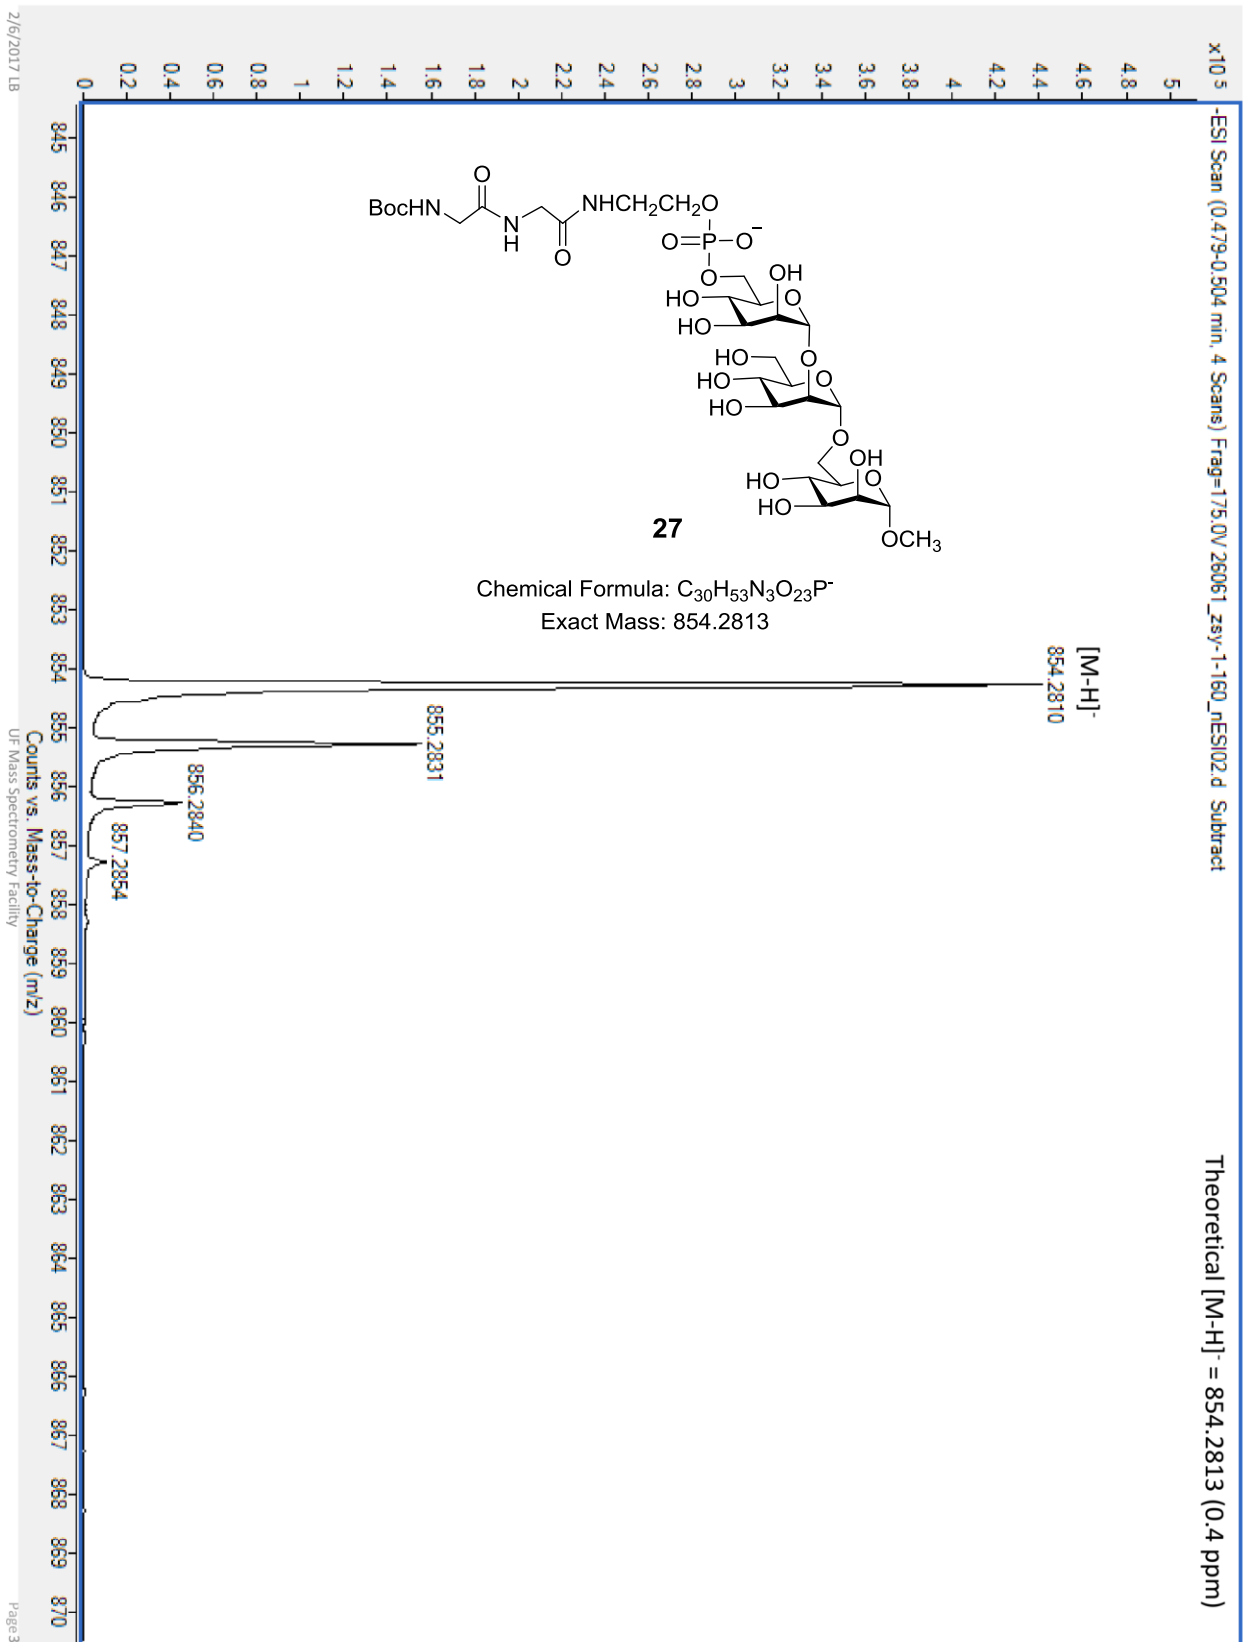

Supplement: NIHMS911922-supplement-SI.pdf [file NIHMS911922-supplement-SI.pdf]
